# Supplementary material for: Effects of Spore-Displayed p75 Protein from Lacticaseibacillus rhamnosus GG on the Transcriptional Response of HT-29 Cells
Source: MDPI journal article supplement (doi:10.3390/microorganisms10071276), 2022-06-23
Supplement: s1 [file s1]

**Journal name:**

Microorganisms

**Manuscript title:**

Effects of spore-displayed p75 protein from *Lacticaseibacillus rhamnosus* GG on the transcriptional response of HT-29 cells

**The names of the authors:**

Soo Ji Kang<sup>1</sup>, Min Joo Kim<sup>1</sup>, Do Yeong Son<sup>1</sup>, Seok Seong Kang<sup>1</sup>, and Kwang Won Hong<sup>1,\*</sup>

**The affiliation and address of the authors:**

<sup>1</sup> Department of Food Science and Biotechnology, College of Life Science and Biotechnology, Dongguk University, Goyang-si 10326, Republic of Korea

**\* Corresponding author:** Kwang Won Hong (E-mail address: [hkwon@dongguk.edu](mailto:hkwon@dongguk.edu), Tel: +82-31-961-5140, Fax: +82-31-961-5108)

**Table S1** Primers used for RT-qPCR for selected genes

| Accession number | Gene symbols    | Forward primer (5'→3')  | Reverse primer (5'→3')   |
|------------------|-----------------|-------------------------|--------------------------|
| NM_001657        | <i>AREG</i>     | GCACCTGGAAGCAGTAACATGC  | GGCAGCTATGGCTGCTAATGCA   |
| NM_001432        | <i>EREG</i>     | CTTATCACAGTCGTCGGTTCCAC | GCCATTCAGACTTGCGGCAACT   |
| NM_001945        | <i>HBEGF</i>    | TGTATCCACGGACCAGCTGCTA  | TGCTCCTCCTTGTTTGGTGTGG   |
| NM_001013442     | <i>EPGN</i>     | GTTCTCACACCTTTGCCTGGAAG | GTCAAGTGCTCACACCTTTCTCC  |
| NM_000639        | <i>FASLG</i>    | GGTTCTGGTTGCCTTGGTAGGA  | CTGTGTGCATCTGGCTGGTAGA   |
| NM_005270        | <i>GLI2</i>     | GTCAGAGCCATCAAGACCGAGA  | GCATCTCCACGCCACTGTCATT   |
| NM_000389        | <i>CDKN1A</i>   | AGGTGGACCTGGAGACTCTCAG  | TCCTCTTGGAGAAGATCAGCCG   |
| NM_005438        | <i>FOSL1</i>    | GGAGGAAGGAACTGACCGACTT  | CTCTAGGCGCTCCTTCTGCTTC   |
| NM_002467        | <i>MYC</i>      | CCTGGTGCTCCATGAGGAGAC   | CAGACTCTGACCTTTTGCCAGG   |
| NM_000602        | <i>SERPINE1</i> | CTCATCAGCCACTGGAAAGGCA  | GACTCGTGAAGTCAGCCTGAAAC  |
| NM_003810        | <i>TNFSF10</i>  | TGGCAACTCCGTCAGCTCGTTA  | AGCTGCTACTCTCTGAGGACCT   |
| NM_001706        | <i>BCL6</i>     | CATGCAGAGATGTGCCTCCACA  | TCAGAGAAGCGGCAGTCACACT   |
| NM_002016        | <i>FLG</i>      | GCTGAAGGAACTTCTGGAAAAGG | GTTGTGGTCTATATCCAAGTGATC |
| NM_005547        | <i>IVL</i>      | GGTCCAAGACATTCAACCAGCC  | TCTGGACACTGCGGGTGGTTAT   |
| NM_005987        | <i>SPRR1A</i>   | GTGAAACAACCTTGCCAGCCTC  | TGGCAGGGCTCTGGAACCTTG    |
| NM_003125        | <i>SPRR1B</i>   | CTGCCCTTCAATAGTCACTCCAG | CTCATACGCAGAATGGGATAGGG  |
| NM_001097589     | <i>SPRR3</i>    | TGAACCAGGCAGCATCAAGGTC  | GAAGGACATGGCTCTGGTAGCT   |
| NM_017511        | <i>MUC5AC</i>   | CCACTGGTTCTATGGCAACACC  | GCCGAAGTCCAGGCTGTGCG     |

**Table S2** Throughput and quality of RNA-seq data

| Sample name <sup>a</sup> | Raw reads  | Clean reads | GC content (%) | Q30 (%) <sup>b</sup> | Mapped reads <sup>c</sup> |
|--------------------------|------------|-------------|----------------|----------------------|---------------------------|
| CON-1                    | 78,305,704 | 77,090,466  | 50.09          | 96.08                | 76,116,020 (98.74%)       |
| CON-2                    | 69,390,858 | 67,876,956  | 46.84          | 95.54                | 65,763,348 (96.89%)       |
| CON-3                    | 79935,542  | 78,407,308  | 46.98          | 95.53                | 74,804,251 (95.4%)        |
| WT-1                     | 80,578,234 | 79,502,480  | 49.40          | 96.25                | 78,534,207 (98.78%)       |
| WT-2                     | 63,678,206 | 62,388,808  | 48.07          | 95.69                | 61,301,961 (98.26%)       |
| WT-3                     | 59,788,048 | 58,381,418  | 47.45          | 95.54                | 57,391,672 (98.3%)        |
| G75-1                    | 69,795,644 | 68,885,098  | 49.98          | 96.53                | 67,886,087 (98.55%)       |
| G75-2                    | 81,607,548 | 79,218,066  | 48.56          | 95.74                | 77,111,419 (97.34%)       |
| G75-3                    | 87,526,726 | 86,105,694  | 46.82          | 95.69                | 84,492,377 (98.13%)       |

<sup>a</sup> Each sample represents HT-29 cells unstimulated (CON) or stimulated with wild-type spore (WT) and CotG-p75 (G75), respectively

<sup>b</sup> Q30 indicates the percentage of sequencing data with an error rate less than 0.1%

<sup>c</sup> Mapped reads represent the reads of clean bases mapped to the reference genome

**Table S3** List of differentially expressed genes between wild-type spores stimulated HT-29 cells and control

| Gene ID   | Transcript ID                                                                                             | Gene Symbol | Description                                   | Fold change (WT/CON) | Raw <i>p</i> -val |
|-----------|-----------------------------------------------------------------------------------------------------------|-------------|-----------------------------------------------|----------------------|-------------------|
| 100532736 | NM_001204088,NM_001204089                                                                                 | MINOS1-NBL1 | MINOS1-NBL1 readthrough                       | 5.711302             | 0.030415887       |
| 140710    | NM_080627,NM_199181                                                                                       | SOGA1       | suppressor of glucose, autophagy associated 1 | 4.993611             | 7.22189E-18       |
| 147111    | NM_178493                                                                                                 | NOTUM       | NOTUM, palmitoleoyl-protein carboxylesterase  | 4.697269             | 0.011976435       |
| 5463      | NM_001330422,NM_001351088,NR_026893,NR_147046,NR_147047,NR_147048,NR_147049,NR_147050,NR_147051,NR_147052 | POU6F1      | POU class 6 homeobox 1                        | 4.234451             | 0.002442382       |
| 5243      | NM_000927,NM_001348944,NM_001348945,NM_001348946                                                          | ABCB1       | ATP binding cassette subfamily B member 1     | 4.049126             | 0.034347626       |
| 201181    | NM_001242704                                                                                              | ZNF385C     | zinc finger protein 385C                      | 3.950943             | 0.014494083       |
| 80125     | NM_001287181,NM_025055,NM_182791                                                                          | CCDC33      | coiled-coil domain containing 33              | 3.618958             | 0.03014839        |
| 9501      | NM_001190411,NM_001190412,NM_001190413,NM_006987                                                          | RPH3AL      | rabphilin 3A like (without C2 domains)        | 3.602920             | 0.000907002       |
| 2979      | NM_002098                                                                                                 | GUCA1B      | guanylate cyclase activator 1B                | 3.416902             | 0.005862771       |
| 9154      | NM_001287761,NM_001287762,NM_001321721,NM_001321722,NM_004213,NM_0201651                                  | SLC28A1     | solute carrier family 28 member 1             | 3.218961             | 0.029048749       |

|           |                                                            |              |                                           |          |             |
|-----------|------------------------------------------------------------|--------------|-------------------------------------------|----------|-------------|
| 401251    | NM_001039651                                               | SAPCD1       | suppressor APC domain containing 1        | 3.212568 | 0.033779138 |
| 108903150 | NR_144447                                                  | ZNF8-ERVK3-1 | ZNF8-ERVK3-1 readthrough                  | 3.157648 | 1.56552E-05 |
| 203102    | NM_001313994,NM_145004                                     | ADAM32       | ADAM metallopeptidase domain 32           | 3.080939 | 0.041062969 |
| 7846      | NM_001270399,NM_001270400,NM_006009                        | TUBA1A       | tubulin alpha 1a                          | 3.004302 | 0.045567622 |
| 160428    | NM_001034173,NR_027752                                     | ALDH1L2      | aldehyde dehydrogenase 1 family member L2 | 2.988939 | 0.030491199 |
| 23148     | NM_001146334                                               | NACAD        | NAC alpha domain containing               | 2.662285 | 0.043102239 |
| 400618    | NR_103737,NR_103738                                        | SOX9-AS1     | SOX9 antisense RNA 1                      | 2.618078 | 0.010155644 |
| 79413     | NM_024508                                                  | ZBED2        | zinc finger BED-type containing 2         | 2.602981 | 0.002156233 |
| 80790     | NM_030629,NM_198390                                        | CMIP         | c-Maf inducing protein                    | 2.566630 | 0.019739208 |
| 138199    | NM_001320497,NM_152420,NR_135282                           | CARNMT1      | carnosine N-methyltransferase 1           | 2.564506 | 0.00687444  |
| 83886     | NM_001318395,NM_031948                                     | PRSS27       | protease, serine 27                       | 2.440817 | 0.04065593  |
| 677825    | NR_002976                                                  | SNORA44      | small nucleolar RNA, H/ACA box 44         | 2.353757 | 0.041160895 |
| 7352      | NM_003356,NM_022803                                        | UCP3         | uncoupling protein 3                      | 2.294909 | 0.015013487 |
| 7052      | NM_001323316,NM_001323317,NM_001323318,NM_004613,NM_198951 | TGM2         | transglutaminase 2                        | 2.283907 | 0.026895712 |
| 25764     | NM_001199885,NM_016400                                     | HYPK         | huntingtin interacting protein K          | 2.258744 | 0.006963514 |

|           |                                                                                                                |             |                                                           |           |             |
|-----------|----------------------------------------------------------------------------------------------------------------|-------------|-----------------------------------------------------------|-----------|-------------|
| 101928689 | NR_109928                                                                                                      | LINC01424   | long intergenic non-protein coding RNA 1424               | 2.244268  | 0.048553463 |
| 6364      | NM_001130046,NM_004591                                                                                         | CCL20       | C-C motif chemokine ligand 20                             | 2.166385  | 0.008796954 |
| 2920      | NM_002089                                                                                                      | CXCL2       | C-X-C motif chemokine ligand 2                            | 2.154919  | 0.021575445 |
| 2840      | NM_001161415,NM_001161416,NM_001161417,NM_005291                                                               | GPR17       | G protein-coupled receptor 17                             | 2.154634  | 0.015847274 |
| 163590    | NM_001199260,NM_001349931,NM_001349933,NM_001349934,NM_001349935,NM_001349936,NM_001349937,NM_022347,NM_145034 | TOR1AIP2    | torsin 1A interacting protein 2                           | 2.108915  | 0.01493783  |
| 254099    | NR_038869                                                                                                      | LINC01342   | long intergenic non-protein coding RNA 1342               | 2.082970  | 0.039009893 |
| 728658    | NR_026712                                                                                                      | RPL13AP5    | ribosomal protein L13a pseudogene 5                       | 2.080822  | 0.005238317 |
| 29114     | NM_001008272,NM_001008273,NM_013259                                                                            | TAGLN3      | transgelin 3                                              | 2.076381  | 0.019636428 |
| 55588     | NM_001317770,NM_017592,NR_133915                                                                               | MED29       | mediator complex subunit 29                               | 2.047612  | 0.012890371 |
| 6640      | NM_003098                                                                                                      | SNTA1       | syntrophin alpha 1                                        | 2.002687  | 0.038991439 |
| 100529144 | NM_001201479                                                                                                   | CORO7-PAM16 | CORO7-PAM16 readthrough                                   | -2.013298 | 0.009531695 |
| 200315    | NM_001270406,NM_145699                                                                                         | APOBEC3A    | apolipoprotein B mRNA editing enzyme catalytic subunit 3A | -2.015495 | 0.043606522 |
| 9991      | NM_001163788,NM_001163790,NM_001244896,NM_001244897,NM_001244898,                                              | PTBP3       | polypyrimidine tract binding protein 3                    | -2.023599 | 0.046782533 |

|           |                                               |              |                                                  |           |             |
|-----------|-----------------------------------------------|--------------|--------------------------------------------------|-----------|-------------|
|           | NM_005156                                     |              |                                                  |           |             |
| 5166      | NM_002612                                     | PK4          | pyruvate dehydrogenase kinase 4                  | -2.028992 | 0.000216423 |
| 8732      | NM_001286426,NM_001286428,NM_003800           | RNGTT        | RNA guanylyltransferase and 5'-phosphatase       | -2.035854 | 0.006541802 |
| 121268    | NM_001303126,NM_144593,NR_130123              | RHEBL1       | Ras homolog enriched in brain like 1             | -2.039483 | 0.003287191 |
| 23306     | NM_001130963,NM_015257                        | NEMP1        | nuclear envelope integral membrane protein 1     | -2.148945 | 0.015217889 |
| 2583      | NM_001276468,NM_001276469,NM_001478           | B4GALNT1     | beta-1,4-N-acetyl-galactosaminyltransferase 1    | -2.158066 | 0.012364564 |
| 7802      | NM_003462                                     | DNALI1       | dynein axonemal light intermediate chain 1       | -2.168669 | 0.009393765 |
| 8339      | NM_003518                                     | HIST1H2BG    | histone cluster 1 H2B family member g            | -2.316632 | 0.001106169 |
| 101929549 | NR_110112                                     | LOC101929549 | uncharacterized LOC101929549                     | -2.364050 | 0.029187118 |
| 105371267 | NR_136518,NR_147075                           | LOC105371267 | p53-regulated lncRNA 1                           | -2.379005 | 0.040032435 |
| 1719      | NM_000791,NM_001290354,NM_001290357,NR_110936 | DHFR         | dihydrofolate reductase                          | -2.453515 | 0.032538864 |
| 377841    | NM_001033113,NM_198585                        | ENTPD8       | ectonucleoside triphosphate diphosphohydrolase 8 | -2.460757 | 0.035359747 |
| 100996724 | NR_144516,NR_144517                           | LOC100996724 | phosphodiesterase 4D interacting protein-like    | -2.479262 | 0.00749269  |
| 26206     | NM_001039592,NM_172312                        | SPAG8        | sperm associated antigen 8                       | -2.564928 | 0.043915365 |

|        |                                                  |           |                                                                             |           |             |
|--------|--------------------------------------------------|-----------|-----------------------------------------------------------------------------|-----------|-------------|
| 9403   | NM_004261,NM_203341,NR_144512,NR_144513          | SELENOF   | selenoprotein F                                                             | -2.673010 | 0.015073822 |
| 2901   | NM_001301030,NM_002088                           | GRIK5     | glutamate ionotropic receptor kainate type subunit 5                        | -2.736920 | 0.032389078 |
| 10891  | NM_001330751,NM_001330752,NM_001330753,NM_013261 | PPARGC1A  | PPARG coactivator 1 alpha                                                   | -2.749119 | 0.020904192 |
| 161753 | NM_175881                                        | ODF3L1    | outer dense fiber of sperm tails 3 like 1                                   | -2.805109 | 0.045557441 |
| 653113 | NR_024254                                        | FAM86FP   | family with sequence similarity 86 member F, pseudogene                     | -2.836866 | 0.002604823 |
| 378938 | NR_002819,NR_144567,NR_144568                    | MALAT1    | metastasis associated lung adenocarcinoma transcript 1 (non-protein coding) | -2.923931 | 0.015785377 |
| 677767 | NR_003001                                        | SCARNA7   | small Cajal body-specific RNA 7                                             | -2.937906 | 0.018131273 |
| 29071  | NM_001011551,NM_152692                           | C1GALT1C1 | C1GALT1 specific chaperone 1                                                | -2.982188 | 0.023708309 |
| 6345   | NM_001098814,NM_001323667,NM_001323668           | SRL       | sarcalumenin                                                                | -2.983180 | 0.03587902  |
| 8351   | NM_003530                                        | HIST1H3D  | histone cluster 1 H3 family member d                                        | -3.158637 | 0.003155483 |
| 144193 | NM_152435                                        | AMDHD1    | amidohydrolase domain containing 1                                          | -3.264341 | 0.010144148 |
| 8348   | NM_003527                                        | HIST1H2BO | histone cluster 1 H2B family member o                                       | -3.389114 | 0.007510994 |
| 85495  | NR_002312                                        | RPPH1     | ribonuclease P RNA component H1                                             | -3.530340 | 0.000607651 |



|           |                                                                    |           |                                                                |            |             |
|-----------|--------------------------------------------------------------------|-----------|----------------------------------------------------------------|------------|-------------|
| 8329      | NM_003509                                                          | HIST1H2AI | histone cluster 1 H2A family member i                          | -3.594152  | 0.004087093 |
| 100507266 | NR_037888                                                          | STX18-AS1 | STX18 antisense RNA 1 (head to head)                           | -3.635330  | 0.03025544  |
| 8343      | NM_003522                                                          | HIST1H2BF | histone cluster 1 H2B family member f                          | -3.772859  | 0.00907002  |
| 106099130 | NR_132348                                                          | GSTT1-AS1 | GSTT1 antisense RNA 1                                          | -3.778788  | 0.035325805 |
| 344657    | NM_001080460                                                       | LRRIQ4    | leucine rich repeats and IQ motif containing 4                 | -3.915645  | 0.031801416 |
| 6023      | NR_003051                                                          | RMRP      | RNA component of mitochondrial RNA processing endoribonuclease | -5.073627  | 0.017091649 |
| 126961    | NM_021059,NM_021059_dup1                                           | HIST2H3C  | histone cluster 2 H3 family member c                           | -5.492560  | 0.020315907 |
| 121274    | NM_001172681,NM_001172682,NM_152320                                | ZNF641    | zinc finger protein 641                                        | -9.394567  | 3.68015E-06 |
| 904       | NM_001240,NM_00127784_2                                            | CCNT1     | cyclin T1                                                      | -12.019002 | 0.044362546 |
| 101060321 | NM_001291462,NM_001291462_dup1,NM_001291462_dup2,NM_001291462_dup3 | TBC1D3G   | TBC1 domain family member 3G                                   | -27.240369 | 0.044164274 |

**Table S4** List of differentially expressed genes between CotG-p75 stimulated HT-29 cells and control

| Gene ID | Transcript ID                                                 | Gene Symbol | Description                                      | Fold change (G75/CON) | Raw <i>p</i> -val |
|---------|---------------------------------------------------------------|-------------|--------------------------------------------------|-----------------------|-------------------|
| 1543    | NM_000499,NM_001319216,NM_001319217                           | CYP1A1      | cytochrome P450 family 1 subfamily A member 1    | 191.945423            | 1.37257E-78       |
| 29114   | NM_001008272,NM_001008273,NM_013259                           | TAGLN3      | transgelin 3                                     | 11.148347             | 2.28108E-17       |
| 1545    | NM_000104                                                     | CYP1B1      | cytochrome P450 family 1 subfamily B member 1    | 9.239607              | 0                 |
| 51702   | NM_016233                                                     | PADI3       | peptidyl arginine deiminase 3                    | 8.747112              | 6.33867E-33       |
| 220     | NM_000693,NM_001293815                                        | ALDH1A3     | aldehyde dehydrogenase 1 family member A3        | 8.154219              | 2.7368E-298       |
| 221472  | NM_173558                                                     | FGD2        | FYVE, RhoGEF and PH domain containing 2          | 7.183803              | 6.58136E-05       |
| 2840    | NM_001161415,NM_001161416,NM_001161417,NM_005291              | GPR17       | G protein-coupled receptor 17                    | 6.522831              | 1.61687E-10       |
| 8120    | NM_001278511,NM_001278512,NM_001348440,NM_001348441,NM_004644 | AP3B2       | adaptor related protein complex 3 beta 2 subunit | 5.699657              | 1.19502E-05       |
| 2736    | NM_005270                                                     | GLI2        | GLI family zinc finger 2                         | 5.524409              | 3.97038E-15       |
| 6699    | NM_003125                                                     | SPRR1B      | small proline rich protein 1B                    | 5.493314              | 7.581E-18         |
| 10170   | NM_001142270,NM_001                                           | DHRS9       | dehydrogenase/reductase 9                        | 5.329982              | 5.86E-45          |

---

|           |                                                                                |           |                                               |          |             |
|-----------|--------------------------------------------------------------------------------|-----------|-----------------------------------------------|----------|-------------|
|           | 142271,NM_001289763,<br>NM_199204                                              |           |                                               |          |             |
| 6707      | NM_001097589,NM_005416                                                         | SPRR3     | small proline rich protein 3                  | 5.304377 | 4.25519E-22 |
| 7133      | NM_001066                                                                      | TNFRSF1B  | TNF receptor superfamily member 1B            | 5.271079 | 3.48243E-11 |
| 375791    | NM_199001                                                                      | CYSRT1    | cysteine rich tail 1                          | 5.104884 | 2.52469E-19 |
| 254439    | NM_001136485                                                                   | C11orf86  | chromosome 11 open reading frame 86           | 5.057713 | 1.2881E-07  |
| 8482      | NM_001146029,NM_001146030,NM_003612                                            | SEMA7A    | semaphorin 7A (John Milton Hagen blood group) | 4.909711 | 2.46531E-08 |
| 100846999 | NR_049831_chr2,NR_049831_chr3                                                  | MIR4444-2 | microRNA 4444-2                               | 4.860051 | 0.005623582 |
| 2702      | NM_005266,NM_181703                                                            | GJA5      | gap junction protein alpha 5                  | 4.842982 | 6.2038E-28  |
| 356       | NM_000639,NM_001302746                                                         | FASLG     | Fas ligand                                    | 4.558933 | 0.00245931  |
| 7846      | NM_001270399,NM_001270400,NM_006009                                            | TUBA1A    | tubulin alpha 1a                              | 4.474841 | 0.003847627 |
| 6398      | NM_003004                                                                      | SECTM1    | secreted and transmembrane 1                  | 4.285178 | 2.04839E-09 |
| 85409     | NM_001271082,NM_033120                                                         | NKD2      | naked cuticle homolog 2                       | 4.194734 | 9.85416E-44 |
| 255324    | NM_001270989,NM_001270990,NM_001270991,NM_001270992,NM_001270993,NR_073114,NR_ | EPGN      | epithelial mitogen                            | 4.131741 | 0.013039185 |

---

|        |                                                                                                           |            |                                                  |          |             |
|--------|-----------------------------------------------------------------------------------------------------------|------------|--------------------------------------------------|----------|-------------|
|        | 073117                                                                                                    |            |                                                  |          |             |
| 6698   | NM_001199828,NM_005987                                                                                    | SPRR1A     | small proline rich protein 1A                    | 4.118056 | 0.00103516  |
| 164312 | NM_152611                                                                                                 | LRRN4      | leucine rich repeat neuronal 4                   | 4.113114 | 1.39408E-14 |
| 285154 | NR_027252                                                                                                 | CYP1B1-AS1 | CYP1B1 antisense RNA 1                           | 4.028174 | 2.49637E-10 |
| 5582   | NM_001316329,NM_002739                                                                                    | PRKCG      | protein kinase C gamma                           | 3.946057 | 8.27897E-14 |
| 5463   | NM_001330422,NM_001351088,NR_026893,NR_147046,NR_147047,NR_147048,NR_147049,NR_147050,NR_147051,NR_147052 | POU6F1     | POU class 6 homeobox 1                           | 3.882133 | 0.002627753 |
| 9788   | NM_001282971,NM_001282974,NM_014751                                                                       | MTSS1      | MTSS1, I-BAR domain containing                   | 3.854426 | 4.87339E-31 |
| 144453 | NM_001282613,NM_001282614,NM_001282615,NM_001282616,NM_032735,NM_152439,NR_104220                         | BEST3      | bestrophin 3                                     | 3.841074 | 0.016040629 |
| 219855 | NM_001145290,NM_198277                                                                                    | SLC37A2    | solute carrier family 37 member 2                | 3.830376 | 1.98055E-16 |
| 6364   | NM_001130046,NM_004591                                                                                    | CCL20      | C-C motif chemokine ligand 20                    | 3.804218 | 1.20057E-06 |
| 245973 | NM_001039362,NM_144                                                                                       | ATP6V1C2   | ATPase H <sup>+</sup> transporting V1 subunit C2 | 3.752930 | 8.74923E-08 |

|           |                                                               |           |                                                            |          |             |
|-----------|---------------------------------------------------------------|-----------|------------------------------------------------------------|----------|-------------|
|           | 583                                                           |           |                                                            |          |             |
| 3038      | NM_001199280,NM_005329,NM_138612                              | HAS3      | hyaluronan synthase 3                                      | 3.717783 | 4.88841E-09 |
| 79094     | NM_001142776,NM_024111                                        | CHAC1     | ChaC glutathione specific gamma-glutamylcyclotransferase 1 | 3.688559 | 1.09396E-10 |
| 7433      | NM_001251882,NM_001251883,NM_001251884,NM_001251885,NM_004624 | VIPR1     | vasoactive intestinal peptide receptor 1                   | 3.611321 | 3.70838E-81 |
| 885       | NM_000729,NM_001174138                                        | CCK       | cholecystokinin                                            | 3.610318 | 0.001486433 |
| 101929125 | NR_109859                                                     | LINC01730 | long intergenic non-protein coding RNA 1730                | 3.541326 | 0.008034132 |
| 140710    | NM_080627,NM_199181                                           | SOGA1     | suppressor of glucose, autophagy associated 1              | 3.466092 | 3.41389E-12 |
| 117157    | NM_053282                                                     | SH2D1B    | SH2 domain containing 1B                                   | 3.455596 | 0.009690138 |
| 79413     | NM_024508                                                     | ZBED2     | zinc finger BED-type containing 2                          | 3.453758 | 2.23807E-05 |
| 1026      | NM_000389,NM_001220777,NM_001220778,NM_001291549,NM_078467    | CDKN1A    | cyclin dependent kinase inhibitor 1A                       | 3.419799 | 8.01542E-94 |
| 340393    | NM_001252402,NM_001252404,NM_001280561, NR_047684             | TMEM249   | transmembrane protein 249                                  | 3.334595 | 0.042034507 |
| 111       | NM_001199642,NM_183357                                        | ADCY5     | adenylate cyclase 5                                        | 3.324753 | 0.049279363 |

|       |                                                            |         |                                                  |          |             |
|-------|------------------------------------------------------------|---------|--------------------------------------------------|----------|-------------|
| 25907 | NM_015444                                                  | TMEM158 | transmembrane protein 158 (gene/pseudogene)      | 3.320155 | 8.27219E-18 |
| 54541 | NM_019058                                                  | DDIT4   | DNA damage inducible transcript 4                | 3.271894 | 6.70371E-70 |
| 84623 | NM_001161707,NM_001301097,NM_032531                        | KIRREL3 | kin of IRRE like 3 (Drosophila)                  | 3.228350 | 9.17243E-05 |
| 1437  | NM_000758                                                  | CSF2    | colony stimulating factor 2                      | 3.225479 | 5.19346E-08 |
| 2069  | NM_001432                                                  | EREG    | epiregulin                                       | 3.221198 | 2.0928E-109 |
| 7128  | NM_001270507,NM_001270508,NM_006290                        | TNFAIP3 | TNF alpha induced protein 3                      | 3.187974 | 2.03684E-11 |
| 3352  | NM_000864                                                  | HTR1D   | 5-hydroxytryptamine receptor 1D                  | 3.169428 | 7.01724E-41 |
| 6624  | NM_003088                                                  | FSCN1   | fascin actin-bundling protein 1                  | 3.167804 | 1.7598E-07  |
| 9940  | NM_001321153,NM_007335,NM_007337                           | DLEC1   | deleted in lung and esophageal cancer 1          | 3.167403 | 1.32736E-05 |
| 78990 | NM_023112                                                  | OTUB2   | OTU deubiquitinase, ubiquitin aldehyde binding 2 | 3.148013 | 1.00829E-20 |
| 8193  | NM_001135155,NM_001135156,NM_001289978,NM_004647           | DPF1    | double PHD fingers 1                             | 3.144756 | 0.025166525 |
| 9841  | NM_001164313,NM_014797                                     | ZBTB24  | zinc finger and BTB domain containing 24         | 3.133866 | 1.28589E-10 |
| 9536  | NM_004878                                                  | PTGES   | prostaglandin E synthase                         | 3.128326 | 0.045531525 |
| 3384  | NM_000873,NM_001099786,NM_001099787,NM_001099788,NM_001099 | ICAM2   | intercellular adhesion molecule 2                | 3.120727 | 0.019057569 |

|           |                                                                         |              |                                                                             |          |             |
|-----------|-------------------------------------------------------------------------|--------------|-----------------------------------------------------------------------------|----------|-------------|
|           | 789                                                                     |              |                                                                             |          |             |
| 8862      | NM_017413                                                               | APLN         | apelin                                                                      | 3.107111 | 0.020805675 |
| 147929    | NM_001042474,NM_152477                                                  | ZNF565       | zinc finger protein 565                                                     | 3.077691 | 4.20123E-54 |
| 8061      | NM_001300844,NM_001300855,NM_001300856,NM_001300857,NM_005438,NR_125339 | FOSL1        | FOS like 1, AP-1 transcription factor subunit                               | 3.062739 | 0.01895985  |
| 101928841 | NM_001304433                                                            | LOC101928841 | collagen alpha-1(II) chain-like                                             | 3.045369 | 1.42336E-45 |
| 3872      | NM_000422                                                               | KRT17        | keratin 17                                                                  | 3.044978 | 0.030591911 |
| 2312      | NM_002016                                                               | FLG          | filaggrin                                                                   | 3.036836 | 4.20727E-05 |
| 1735      | NM_001362                                                               | DIO3         | iodothyronine deiodinase 3                                                  | 3.036003 | 0.009405687 |
| 57514     | NM_020754                                                               | ARHGAP31     | Rho GTPase activating protein 31                                            | 3.026232 | 0.007540874 |
| 55084     | NM_018013                                                               | SOBP         | sine oculis binding protein homolog                                         | 3.021249 | 4.01005E-52 |
| 57214     | NM_001293298,NM_001293304,NM_018689                                     | CEMIP        | cell migration inducing hyaluronan binding protein                          | 3.009316 | 0.003029468 |
| 2331      | NM_002023,NR_103757                                                     | FMOD         | fibromodulin                                                                | 3.001652 | 4.58295E-24 |
| 3283      | NM_000862,NM_001328615                                                  | HSD3B1       | hydroxy-delta-5-steroid dehydrogenase, 3 beta-and steroid delta-isomerase 1 | 2.986105 | 0.020496109 |
| 10896     | NM_022375                                                               | OCLM         | oculomedin                                                                  | 2.963107 | 0.002233085 |
| 100131378 | NM_001166692                                                            | C11orf91     | chromosome 11 open reading frame 91                                         | 2.943090 | 0.03958522  |

|        |                                                                                                                          |          |                                        |          |             |
|--------|--------------------------------------------------------------------------------------------------------------------------|----------|----------------------------------------|----------|-------------|
| 6317   | NM_006919                                                                                                                | SERPINB3 | serpin family B member 3               | 2.932880 | 0.011226637 |
| 2979   | NM_002098                                                                                                                | GUCA1B   | guanylate cyclase activator 1B         | 2.925289 | 1.04219E-75 |
| 374    | NM_001657,NM_001657_dup1                                                                                                 | AREG     | amphiregulin                           | 2.792427 | 2.42195E-49 |
| 10123  | NM_001282431,NM_005737                                                                                                   | ARL4C    | ADP ribosylation factor like GTPase 4C | 2.760695 | 0.004434847 |
| 2498   | NR_002201                                                                                                                | FTH1P3   | ferritin heavy chain 1 pseudogene 3    | 2.754462 | 0.000888934 |
| 6536   | NM_001024845,NM_001261380,NM_001328626,NM_001328627,NM_001328628,NM_001328629,NM_001328630,NM_006934,NM_201649,NR_048548 | SLC6A9   | solute carrier family 6 member 9       | 2.744465 | 8.59642E-80 |
| 54206  | NM_018948                                                                                                                | ERRFI1   | ERBB receptor feedback inhibitor 1     | 2.722261 | 0.022235995 |
| 259236 | NM_147196                                                                                                                | TMIE     | transmembrane inner ear                | 2.659485 | 0.000116243 |
| 84981  | NR_028502,NR_028503,NR_028504,NR_028505                                                                                  | MIR22HG  | MIR22 host gene                        | 2.635537 | 2.76889E-59 |
| 126917 | NM_001136265                                                                                                             | IFFO2    | intermediate filament family orphan 2  | 2.616536 | 0.022407478 |
| 56241  | NM_019601                                                                                                                | SUSD2    | sushi domain containing 2              | 2.614846 | 0.003347381 |
| 117155 | NM_001282309,NM_001282310,NM_172095,NR_110319                                                                            | CATSPER2 | cation channel sperm associated 2      | 2.610799 | 1.81529E-46 |



|           |                                                                                                                                                          |           |                                                               |          |             |
|-----------|----------------------------------------------------------------------------------------------------------------------------------------------------------|-----------|---------------------------------------------------------------|----------|-------------|
| 84803     | NM_001256421,NM_001256422,NM_032717                                                                                                                      | GPAT3     | glycerol-3-phosphate acyltransferase 3                        | 2.608791 | 0.039721486 |
| 171169    | NM_133498                                                                                                                                                | SPACA4    | sperm acrosome associated 4                                   | 2.607807 | 1.08142E-62 |
| 266977    | NM_025048,NM_153840                                                                                                                                      | ADGRF1    | adhesion G protein-coupled receptor F1                        | 2.603004 | 0.001633467 |
| 100506737 | NR_131244                                                                                                                                                | LINC01589 | long intergenic non-protein coding RNA 1589                   | 2.602534 | 7.62893E-39 |
| 100499467 | NR_036488,NR_137280,NR_137281                                                                                                                            | LINC00673 | long intergenic non-protein coding RNA 673                    | 2.576686 | 3.91133E-13 |
| 137994    | NM_001199659,NM_001199660,NM_001286787,NM_001286819,NM_001286821,NM_001330515,NM_144652                                                                  | LETM2     | leucine zipper and EF-hand containing transmembrane protein 2 | 2.572450 | 4.03826E-42 |
| 360       | NM_001318144,NM_004925                                                                                                                                   | AQP3      | aquaporin 3 (Gill blood group)                                | 2.570650 | 6.2413E-35  |
| 23135     | NM_001080424,NM_001348716                                                                                                                                | KDM6B     | lysine demethylase 6B                                         | 2.544534 | 1.04954E-48 |
| 91663     | NM_001020818,NM_001020819,NM_001020820,NM_001020821,NM_001290188,NM_001290189,NM_001290190,NM_001290191,NM_001290192,NM_001290193,NM_001290194,NM_138373 | MYADM     | myeloid associated differentiation marker                     | 2.539238 | 7.46149E-05 |
| 100499177 | NR_034075,NR_034076,NR_034077                                                                                                                            | THAP9-AS1 | THAP9 antisense RNA 1                                         | 2.529425 | 1.95098E-07 |

|        |                                                  |           |                                                   |          |             |
|--------|--------------------------------------------------|-----------|---------------------------------------------------|----------|-------------|
| 164832 | NM_198461                                        | LONRF2    | LON peptidase N-terminal domain and ring finger 2 | 2.522746 | 2.46176E-05 |
| 399473 | NM_001042522,NR_073032                           | SPRED3    | sprouty related EVH1 domain containing 3          | 2.518955 | 4.04157E-05 |
| 26086  | NM_001145638,NM_001145639,NM_001200003,NM_015597 | GPSM1     | G protein signaling modulator 1                   | 2.517783 | 1.3941E-13  |
| 11010  | NM_006851                                        | GLIPR1    | GLI pathogenesis related 1                        | 2.516977 | 1.90843E-34 |
| 168455 | NM_175884                                        | CCDC71L   | coiled-coil domain containing 71 like             | 2.516709 | 0.003452083 |
| 2920   | NM_002089                                        | CXCL2     | C-X-C motif chemokine ligand 2                    | 2.509510 | 6.60711E-09 |
| 4586   | NM_001304359                                     | MUC5AC    | mucin 5AC, oligomeric mucus/gel-forming           | 2.492205 | 1.6051E-34  |
| 9518   | NM_004864                                        | GDF15     | growth differentiation factor 15                  | 2.477376 | 8.96234E-17 |
| 11240  | NM_007365                                        | PADI2     | peptidyl arginine deiminase 2                     | 2.467617 | 0.014713806 |
| 84290  | NM_032330                                        | CAPNS2    | calpain small subunit 2                           | 2.444739 | 0.042235493 |
| 25758  | NM_012194                                        | KIAA1549L | KIAA1549 like                                     | 2.440597 | 0.000638616 |
| 3371   | NM_002160                                        | TNC       | tenascin C                                        | 2.439789 | 9.53819E-27 |
| 283174 | NR_024344                                        | MIR4697HG | MIR4697 host gene                                 | 2.437494 | 3.74979E-12 |
| 57491  | NM_001242412,NM_020731                           | AHRR      | aryl-hydrocarbon receptor repressor               | 2.437478 | 5.53821E-10 |
| 6581   | NM_021977                                        | SLC22A3   | solute carrier family 22 member 3                 | 2.432945 | 5.10832E-38 |
| 5743   | NM_000963                                        | PTGS2     | prostaglandin-endoperoxide synthase 2             | 2.424420 | 1.41594E-43 |

|        |                                                                            |         |                                                              |          |             |
|--------|----------------------------------------------------------------------------|---------|--------------------------------------------------------------|----------|-------------|
| 112574 | NM_001102575,NM_001145427,NM_052870                                        | SNX18   | sorting nexin 18                                             | 2.422601 | 1.22828E-25 |
| 3576   | NM_000584                                                                  | CXCL8   | C-X-C motif chemokine ligand 8                               | 2.417164 | 2.81662E-52 |
| 9965   | NM_005117                                                                  | FGF19   | fibroblast growth factor 19                                  | 2.400426 | 6.31072E-15 |
| 29126  | NM_001267706,NM_001314029,NM_014143,NR_052005                              | CD274   | CD274 molecule                                               | 2.381806 | 0.000802025 |
| 6781   | NM_003155                                                                  | STC1    | stanniocalcin 1                                              | 2.381257 | 1.62214E-10 |
| 84541  | NM_032505                                                                  | KBTBD8  | kelch repeat and BTB domain containing 8                     | 2.357111 | 3.47238E-20 |
| 23328  | NM_001346505,NM_001346506,NM_001346507,NM_001346508,NM_001346509,NM_015278 | SASH1   | SAM and SH3 domain containing 1                              | 2.335536 | 0.004282334 |
| 2669   | NM_005261,NM_181702                                                        | GEM     | GTP binding protein overexpressed in skeletal muscle         | 2.327218 | 1.42652E-25 |
| 29943  | NM_013358                                                                  | PADI1   | peptidyl arginine deiminase 1                                | 2.318097 | 7.71605E-59 |
| 7791   | NM_001010972,NM_003461                                                     | ZYX     | zyxin                                                        | 2.317488 | 0.007893833 |
| 6640   | NM_003098                                                                  | SNTA1   | syntrophin alpha 1                                           | 2.312051 | 0.000233849 |
| 4242   | NM_001166343,NM_002405,NR_029413                                           | MFNG    | MFNG O-fucosylpeptide 3-beta-N-acetylglucosaminyltransferase | 2.310436 | 0.008476167 |
| 168620 | NM_177455                                                                  | BHLHA15 | basic helix-loop-helix family member a15                     | 2.276086 | 9.01723E-32 |
| 9590   | NM_005100,NM_144497                                                        | AKAP12  | A-kinase anchoring protein 12                                | 2.273980 | 1.00901E-23 |

|        |                                                                                                                             |           |                                                    |          |             |
|--------|-----------------------------------------------------------------------------------------------------------------------------|-----------|----------------------------------------------------|----------|-------------|
| 2571   | NM_000817,NM_013445                                                                                                         | GAD1      | glutamate decarboxylase 1                          | 2.271789 | 5.99216E-65 |
| 8140   | NM_003486                                                                                                                   | SLC7A5    | solute carrier family 7 member 5                   | 2.263884 | 1.07369E-71 |
| 22822  | NM_007350                                                                                                                   | PHLDA1    | pleckstrin homology like domain family A member 1  | 2.260046 | 0.001027526 |
| 1958   | NM_001964                                                                                                                   | EGR1      | early growth response 1                            | 2.259638 | 0.000179646 |
| 339894 | NR_034007                                                                                                                   | LINC00880 | long intergenic non-protein coding RNA 880         | 2.256482 | 8.17417E-71 |
| 6484   | NM_001254757,NM_001254758,NM_001254759,NM_001348396,NM_001348397,NM_001348398,NM_001348399,NM_001348400,NM_006278,NR_145671 | ST3GAL4   | ST3 beta-galactoside alpha-2,3-sialyltransferase 4 | 2.232742 | 1.72609E-26 |
| 65981  | NM_001002259,NM_001206856,NM_001319842,NM_001319843,NM_001319844,NM_001319845,NM_001319846,NM_023925,NM_032156              | CAPRIN2   | caprin family member 2                             | 2.223298 | 0.002073422 |
| 10137  | NM_001198838,NM_001198840,NM_006047,NM_152838                                                                               | RBM12     | RNA binding motif protein 12                       | 2.220596 | 2.00214E-15 |
| 130497 | NM_145260                                                                                                                   | OSR1      | odd-skipped related transcription factor 1         | 2.215743 | 0.02431871  |
| 677839 | NR_003017                                                                                                                   | SNORA71C  | small nucleolar RNA, H/ACA box 71C                 | 2.206251 | 0.02431871  |
| 57473  | NM_020713                                                                                                                   | ZNF512B   | zinc finger protein 512B                           | 2.197257 | 0.004020972 |

|           |                                                  |             |                                                          |          |             |
|-----------|--------------------------------------------------|-------------|----------------------------------------------------------|----------|-------------|
| 100505994 | NR_103548,NR_103549                              | LUCAT1      | lung cancer associated transcript 1 (non-protein coding) | 2.194235 | 0.00016789  |
| 108903150 | NR_144447                                        | ZNF8-ERV3-1 | ZNF8-ERV3-1 readthrough                                  | 2.191464 | 0.001775745 |
| 6513      | NM_006516                                        | SLC2A1      | solute carrier family 2 member 1                         | 2.189117 | 5.15137E-57 |
| 11227     | NM_001329868,NM_014568                           | GALNT5      | polypeptide N-acetylgalactosaminyltransferase 5          | 2.186057 | 1.55485E-08 |
| 1839      | NM_001945                                        | HBEGF       | heparin binding EGF like growth factor                   | 2.180764 | 9.10819E-06 |
| 9120      | NM_001174166,NM_004694                           | SLC16A6     | solute carrier family 16 member 6                        | 2.178564 | 0.016133014 |
| 100507178 | NR_037868                                        | SLFNL1-AS1  | SLFNL1 antisense RNA 1                                   | 2.178044 | 0.0059774   |
| 22997     | NM_001277285                                     | IGSF9B      | immunoglobulin superfamily member 9B                     | 2.177263 | 1.64836E-16 |
| 9586      | NM_001011666,NM_004904,NM_182898,NM_182899       | CREB5       | cAMP responsive element binding protein 5                | 2.170680 | 7.08338E-07 |
| 4188      | NM_001300804,NM_001300805,NM_001300806,NM_005586 | MDF1        | MyoD family inhibitor                                    | 2.169043 | 0.001280461 |
| 100820829 | NM_001018100,NM_152451                           | MYZAP       | myocardial zonula adherens protein                       | 2.163825 | 1.93088E-33 |
| 10397     | NM_001135242,NM_001258432,NM_001258433,NM_006096 | NDRG1       | N-myc downstream regulated 1                             | 2.163677 | 4.67021E-14 |
| 80153     | NM_001142443,NM_001                              | EDC3        | enhancer of mRNA decapping 3                             | 2.145487 | 1.20944E-52 |

|       |                                                          |          |                                                      |          |             |
|-------|----------------------------------------------------------|----------|------------------------------------------------------|----------|-------------|
|       | 142444,NM_001351378,<br>NM_001351379,NM_025<br>083       |          |                                                      |          |             |
| 90102 | NM_001134437,NM_001<br>134438,NM_001134439,<br>NM_145753 | PHLDB2   | pleckstrin homology like domain family B<br>member 2 | 2.143867 | 1.26832E-12 |
| 5054  | NM_000602                                                | SERPINE1 | serpin family E member 1                             | 2.142781 | 3.73661E-06 |
| 3713  | NM_005547                                                | IVL      | involucrin                                           | 2.141007 | 1.17282E-07 |
| 7477  | NM_058238                                                | WNT7B    | Wnt family member 7B                                 | 2.134060 | 1.65228E-32 |
| 8572  | NM_001131027,NM_003<br>687                               | PDLIM4   | PDZ and LIM domain 4                                 | 2.133899 | 0.021724785 |
| 6722  | NM_001292001,NM_003<br>131                               | SRF      | serum response factor                                | 2.123975 | 0.046328683 |
| 9957  | NM_005114                                                | HS3ST1   | heparan sulfate-glucosamine 3-sulfotransferase 1     | 2.122846 | 2.54439E-43 |
| 5795  | NM_001098503,NM_002<br>843                               | PTPRJ    | protein tyrosine phosphatase, receptor type J        | 2.122527 | 5.0724E-37  |
| 4609  | NM_002467                                                | MYC      | MYC proto-oncogene, bHLH transcription factor        | 2.120155 | 1.33277E-40 |
| 23657 | NM_014331                                                | SLC7A11  | solute carrier family 7 member 11                    | 2.101824 | 8.63694E-37 |
| 250   | NM_001632                                                | ALPP     | alkaline phosphatase, placental                      | 2.101648 | 0.041074205 |
| 2706  | NM_004004                                                | GJB2     | gap junction protein beta 2                          | 2.097460 | 2.46252E-43 |
| 8771  | NM_003823                                                | TNFRSF6B | TNF receptor superfamily member 6b                   | 2.091485 | 0.028242108 |
| 89870 | NM_033229                                                | TRIM15   | tripartite motif containing 15                       | 2.080390 | 8.36575E-18 |

|        |                                                  |          |                                                                                 |          |             |
|--------|--------------------------------------------------|----------|---------------------------------------------------------------------------------|----------|-------------|
| 55901  | NM_018676,NM_199263                              | THSD1    | thrombospondin type 1 domain containing 1                                       | 2.079871 | 0.017245524 |
| 23109  | NM_015086                                        | DDN      | dendrin                                                                         | 2.075644 | 0.032912451 |
| 22936  | NM_012081                                        | ELL2     | elongation factor for RNA polymerase II 2                                       | 2.075086 | 3.98991E-29 |
| 10019  | NM_001291424,NM_005475                           | SH2B3    | SH2B adaptor protein 3                                                          | 2.073470 | 2.1724E-09  |
| 805    | NM_001305624,NM_001305625,NM_001305626,NM_001743 | CALM2    | calmodulin 2                                                                    | 2.072885 | 1.03106E-25 |
| 55243  | NM_001286349,NM_018240                           | KIRREL   | kin of IRRE like (Drosophila)                                                   | 2.063314 | 3.11531E-11 |
| 27063  | NM_014391                                        | ANKRD1   | ankyrin repeat domain 1                                                         | 2.061869 | 0.002724582 |
| 8728   | NM_033274                                        | ADAM19   | ADAM metallopeptidase domain 19                                                 | 2.053270 | 1.58861E-21 |
| 163732 | NM_133467                                        | CITED4   | Cbp/p300 interacting transactivator with Glu/Asp rich carboxy-terminal domain 4 | 2.052827 | 0.001930559 |
| 399972 | NR_033839                                        | GSEC     | G-quadruplex forming sequence containing lncRNA                                 | 2.051453 | 7.63169E-05 |
| 1045   | NM_001265                                        | CDX2     | caudal type homeobox 2                                                          | 2.049061 | 5.8418E-05  |
| 1506   | NM_001907                                        | CTRL     | chymotrypsin like                                                               | 2.048620 | 0.000331527 |
| 6004   | NM_002928                                        | RGS16    | regulator of G protein signaling 16                                             | 2.046753 | 9.28378E-07 |
| 1847   | NM_004419                                        | DUSP5    | dual specificity phosphatase 5                                                  | 2.038920 | 2.83221E-17 |
| 116936 | NR_000026                                        | SNORD139 | small nucleolar RNA, C/D box 139                                                | 2.035013 | 0.020342554 |

|           |                                                                                     |           |                                                            |          |             |
|-----------|-------------------------------------------------------------------------------------|-----------|------------------------------------------------------------|----------|-------------|
| 84951     | NM_032865                                                                           | TNS4      | tensin 4                                                   | 2.032424 | 2.01517E-42 |
| 59285     | NM_031897,NM_145814<br>,NM_145815,NR_102308                                         | CACNG6    | calcium voltage-gated channel auxiliary subunit<br>gamma 6 | 2.030350 | 1.70511E-06 |
| 5778      | NM_001199797,NM_002<br>832,NM_080588,NR_037<br>663,NR_037664                        | PTPN7     | protein tyrosine phosphatase, non-receptor type 7          | 2.027542 | 1.75707E-14 |
| 254427    | NM_153256                                                                           | PROSER2   | proline and serine rich 2                                  | 2.027244 | 3.46484E-34 |
| 3556      | NM_001167928,NM_001<br>167929,NM_001167930,<br>NM_001167931,NM_002<br>182,NM_134470 | IL1RAP    | interleukin 1 receptor accessory protein                   | 2.027198 | 4.34928E-08 |
| 105374177 | NR_135546                                                                           | LINC02029 | long intergenic non-protein coding RNA 2029                | 2.025677 | 0.000717704 |
| 64651     | NM_001320559,NM_001<br>320560,NM_033027                                             | CSRNP1    | cysteine and serine rich nuclear protein 1                 | 2.021440 | 1.91772E-12 |
| 3628      | NM_001128928,NM_002<br>194                                                          | INPP1     | inositol polyphosphate-1-phosphatase                       | 2.012929 | 4.97391E-38 |
| 9388      | NM_001308006,NM_006<br>033                                                          | LIPG      | lipase G, endothelial type                                 | 2.009272 | 6.67785E-37 |
| 440193    | NM_001080414                                                                        | CCDC88C   | coiled-coil domain containing 88C                          | 2.006184 | 4.42887E-41 |
| 221468    | NM_001162900,NM_001<br>286401,NM_145316,NR_<br>104442,NR_104443                     | TMEM217   | transmembrane protein 217                                  | 2.003065 | 0.002278448 |
| 79465     | NM_024518                                                                           | ULBP3     | UL16 binding protein 3                                     | 2.002097 | 1.22755E-18 |



|        |                                                      |           |                                                                    |           |             |
|--------|------------------------------------------------------|-----------|--------------------------------------------------------------------|-----------|-------------|
| 400673 | NM_001017921                                         | VMAC      | vimentin-type intermediate filament associated coiled-coil protein | -2.001977 | 0.0020581   |
| 57167  | NM_001318031,NM_020436                               | SALL4     | spalt like transcription factor 4                                  | -2.003012 | 1.41372E-06 |
| 56260  | NM_019607                                            | C8orf44   | chromosome 8 open reading frame 44                                 | -2.003040 | 9.1142E-05  |
| 84952  | NM_001252335,NM_032866                               | CGNL1     | cingulin like 1                                                    | -2.003991 | 4.99893E-05 |
| 387787 | NM_001144869,NM_001329941,NM_001329942               | LIPT2     | lipoyl(octanoyl) transferase 2 (putative)                          | -2.005380 | 5.0905E-07  |
| 143872 | NM_152432                                            | ARHGAP42  | Rho GTPase activating protein 42                                   | -2.006057 | 1.32283E-13 |
| 25764  | NM_001199885,NM_016400                               | HYPK      | huntingtin interacting protein K                                   | -2.014833 | 0.014075041 |
| 150759 | NR_103734                                            | LINC00342 | long intergenic non-protein coding RNA 342                         | -2.018011 | 5.21346E-07 |
| 6843   | NM_001297438,NM_014231,NM_016830,NM_199245,NR_123717 | VAMP1     | vesicle associated membrane protein 1                              | -2.018349 | 5.20101E-07 |
| 642366 | NR_046243                                            | LOC642366 | uncharacterized LOC642366                                          | -2.018567 | 1.21415E-07 |
| 26269  | NM_012180                                            | FBXO8     | F-box protein 8                                                    | -2.020903 | 9.85161E-09 |
| 5652   | NM_002773                                            | PRSS8     | protease, serine 8                                                 | -2.021801 | 7.91939E-37 |
| 192670 | NM_017629,NR_146062                                  | AGO4      | argonaute 4, RISC catalytic component                              | -2.022005 | 3.82463E-18 |
| 253018 | NR_026791                                            | HCG27     | HLA complex group 27 (non-protein coding)                          | -2.033615 | 0.003468705 |
| 203228 | NM_001256054,NM_018                                  | C9orf72   | chromosome 9 open reading frame 72                                 | -2.036136 | 0.000441187 |

|           |                                                                                            |           |                                             |           |             |
|-----------|--------------------------------------------------------------------------------------------|-----------|---------------------------------------------|-----------|-------------|
|           | 325,NM_145005                                                                              |           |                                             |           |             |
| 286144    | NM_001171795,NM_001171796,NM_001171797,NM_001171798,NM_001171799,NM_001191035,NM_001191036 | TRIQQ     | triple QxxK/R motif containing              | -2.037722 | 0.048780511 |
| 3707      | NM_002221                                                                                  | ITPKB     | inositol-trisphosphate 3-kinase B           | -2.039248 | 2.17736E-13 |
| 83935     | NM_032021                                                                                  | TMEM133   | transmembrane protein 133                   | -2.039421 | 2.25113E-09 |
| 220359    | NM_145719                                                                                  | TIGD3     | tigger transposable element derived 3       | -2.040293 | 0.005228195 |
| 27141     | NM_001318807,NM_014430                                                                     | CIDEB     | cell death-inducing DFPA-like effector b    | -2.042098 | 0.030950694 |
| 3202      | NM_019102                                                                                  | HOXA5     | homeobox A5                                 | -2.042930 | 1.15683E-26 |
| 55593     | NM_001136157,NM_001136158,NM_001136159,NM_017602                                           | OTUD5     | OTU deubiquitinase 5                        | -2.043956 | 2.91431E-05 |
| 51027     | NM_001321025,NM_001321026,NM_016074                                                        | BOLA1     | bolA family member 1                        | -2.047546 | 2.70265E-06 |
| 100505783 | NR_038337,NR_038338,NR_038339                                                              | OSER1-AS1 | OSER1 antisense RNA 1 (head to head)        | -2.051336 | 7.95615E-07 |
| 9481      | NM_001204051,NM_001204052,NM_004277                                                        | SLC25A27  | solute carrier family 25 member 27          | -2.053717 | 9.15261E-39 |
| 84181     | NM_032221                                                                                  | CHD6      | chromodomain helicase DNA binding protein 6 | -2.056669 | 4.28386E-05 |
| 113220    | NM_138424                                                                                  | KIF12     | kinesin family member 12                    | -2.057832 | 0.0048857   |

|        |                                                            |          |                                              |           |             |
|--------|------------------------------------------------------------|----------|----------------------------------------------|-----------|-------------|
| 285313 | NM_001178145,NM_001178146,NM_178822                        | IGSF10   | immunoglobulin superfamily member 10         | -2.058676 | 5.01438E-05 |
| 11067  | NM_007021                                                  | C10orf10 | chromosome 10 open reading frame 10          | -2.059031 | 1.46631E-13 |
| 341640 | NM_207361                                                  | FREM2    | FRAS1 related extracellular matrix protein 2 | -2.059067 | 0.001120302 |
| 84140  | NM_001201543,NM_032180,NR_037710                           | FAM161A  | family with sequence similarity 161 member A | -2.062177 | 2.6933E-11  |
| 1945   | NM_005227,NM_182689,NM_182690                              | EFNA4    | ephrin A4                                    | -2.067051 | 0.005749027 |
| 80741  | NM_025262                                                  | LY6G5C   | lymphocyte antigen 6 family member G5C       | -2.068540 | 1.85093E-09 |
| 220213 | NM_001145373                                               | OTUD1    | OTU deubiquitinase 1                         | -2.069453 | 1.44309E-13 |
| 8611   | NM_003711,NM_176895,NR_103485                              | PLPP1    | phospholipid phosphatase 1                   | -2.069463 | 2.36575E-30 |
| 57476  | NM_001286563,NM_001286564,NM_001330396,NM_020716           | GRAMD1B  | GRAM domain containing 1B                    | -2.074839 | 1.75009E-05 |
| 2861   | NM_005302                                                  | GPR37    | G protein-coupled receptor 37                | -2.075599 | 3.46475E-08 |
| 91894  | NM_080659                                                  | C11orf52 | chromosome 11 open reading frame 52          | -2.076392 | 0.013206842 |
| 256691 | NM_001347990,NM_153267,NR_125850                           | MAMDC2   | MAM domain containing 2                      | -2.080711 | 1.30343E-11 |
| 619279 | NM_001033723                                               | ZNF704   | zinc finger protein 704                      | -2.081680 | 1.88639E-05 |
| 25961  | NM_001283014,NM_001283015,NM_001283016,NM_001283017,NM_001 | NUDT13   | nudix hydrolase 13                           | -2.082047 | 0.00046424  |

|        |                                                                                                                                                 |         |                                                                                        |           |             |
|--------|-------------------------------------------------------------------------------------------------------------------------------------------------|---------|----------------------------------------------------------------------------------------|-----------|-------------|
|        | 283019,NM_015901,NR_104264                                                                                                                      |         |                                                                                        |           |             |
| 50640  | NM_001256007,NM_001256008,NM_001256009,NM_001256010,NM_001256011,NM_015723                                                                      | PNPLA8  | patatin like phospholipase domain containing 8                                         | -2.082214 | 2.32654E-08 |
| 8705   | NM_003782                                                                                                                                       | B3GALT4 | beta-1,3-galactosyltransferase 4                                                       | -2.082632 | 2.32654E-08 |
| 4929   | NM_006186                                                                                                                                       | NR4A2   | nuclear receptor subfamily 4 group A member 2                                          | -2.084025 | 2.49302E-06 |
| 2524   | NM_000511,NM_001097638                                                                                                                          | FUT2    | fucosyltransferase 2                                                                   | -2.084393 | 5.62897E-10 |
| 256302 | NM_152914                                                                                                                                       | NATD1   | N-acetyltransferase domain containing 1                                                | -2.084716 | 0.000525885 |
| 3955   | NM_001040167,NM_001040168,NM_001166355,NM_002304                                                                                                | LFNG    | LFNG O-fucosylpeptide 3-beta-N-acetylglucosaminyltransferase                           | -2.091160 | 3.78797E-25 |
| 8269   | NM_003492                                                                                                                                       | TMEM187 | transmembrane protein 187                                                              | -2.096133 | 5.44933E-09 |
| 65983  | NM_001146319,NM_001146320,NM_001146321,NM_001146322,NM_001349541,NM_001349542,NM_001349543,NM_001349544,NM_023927,NR_146195,NR_146196,NR_146197 | GRAMD2B | GRAM domain containing 2B                                                              | -2.099456 | 1.30459E-11 |
| 11320  | NM_001160154,NM_012214                                                                                                                          | MGAT4A  | mannosyl (alpha-1,3-)-glycoprotein beta-1,4-N-acetylglucosaminyltransferase, isozyme A | -2.101867 | 0.01962194  |

|           |                                                                                         |              |                                                               |           |             |
|-----------|-----------------------------------------------------------------------------------------|--------------|---------------------------------------------------------------|-----------|-------------|
| 55893     | NM_018660                                                                               | ZNF395       | zinc finger protein 395                                       | -2.103568 | 3.07535E-14 |
| 2628      | NM_001321015,NM_001482                                                                  | GATM         | glycine amidinotransferase                                    | -2.105119 | 0.042145798 |
| 100130872 | NR_024569                                                                               | LOC100130872 | uncharacterized LOC100130872                                  | -2.108729 | 0.03061536  |
| 101928068 | NR_111907                                                                               | LOC101928068 | uncharacterized LOC101928068                                  | -2.109143 | 0.011394672 |
| 23522     | NM_001256468,NM_001256469,NM_012330                                                     | KAT6B        | lysine acetyltransferase 6B                                   | -2.110533 | 3.12582E-28 |
| 93589     | NM_172364                                                                               | CACNA2D4     | calcium voltage-gated channel auxiliary subunit alpha2delta 4 | -2.112354 | 0.006075623 |
| 100287896 | NM_001319240                                                                            | LOC100287896 | uncharacterized LOC100287896                                  | -2.112767 | 8.07578E-09 |
| 57822     | NM_001195010,NM_021180,NM_198173,NM_198174                                              | GRHL3        | grainyhead like transcription factor 3                        | -2.115761 | 5.0653E-11  |
| 11174     | NM_197941,NR_135689                                                                     | ADAMTS6      | ADAM metalloproteinase with thrombospondin type 1 motif 6     | -2.119841 | 3.02639E-20 |
| 219902    | NM_001198670,NM_001198671,NM_001198672,NM_001198673,NM_001198674,NM_001198675,NM_174926 | TMEM136      | transmembrane protein 136                                     | -2.120334 | 0.000510852 |
| 148418    | NM_001010971,NM_001134663,NM_001134664                                                  | SAMD13       | sterile alpha motif domain containing 13                      | -2.124038 | 0.013583588 |
| 11074     | NM_007028,NR_134870,NR_134871                                                           | TRIM31       | tripartite motif containing 31                                | -2.127565 | 2.08694E-48 |

|        |                                         |           |                                                               |           |             |
|--------|-----------------------------------------|-----------|---------------------------------------------------------------|-----------|-------------|
| 55812  | NM_001040428,NM_018418                  | SPATA7    | spermatogenesis associated 7                                  | -2.127687 | 0.001101027 |
| 63920  | NM_001303251,NM_022090                  | ZBED8     | zinc finger BED-type containing 8                             | -2.128422 | 2.98134E-07 |
| 2624   | NM_001145661,NM_001145662,NM_032638     | GATA2     | GATA binding protein 2                                        | -2.129013 | 5.55213E-46 |
| 64283  | NM_001080479,NM_001177693,NM_001244364  | ARHGEF28  | Rho guanine nucleotide exchange factor 28                     | -2.129389 | 6.13691E-31 |
| 8322   | NM_012193                               | FZD4      | frizzled class receptor 4                                     | -2.132271 | 3.56931E-05 |
| 283460 | NR_024345                               | HNF1A-AS1 | HNF1A antisense RNA 1                                         | -2.133019 | 0.000226686 |
| 2065   | NM_001005915,NM_001982                  | ERBB3     | erb-b2 receptor tyrosine kinase 3                             | -2.140027 | 1.18815E-43 |
| 56256  | NM_019605                               | SERTAD4   | SERTA domain containing 4                                     | -2.147460 | 0.001041684 |
| 23531  | NM_012329                               | MMD       | monocyte to macrophage differentiation associated             | -2.153879 | 3.81582E-16 |
| 389136 | NM_001320493,NM_001320494,NM_016206     | VGLL3     | vestigial like family member 3                                | -2.160728 | 3.87553E-05 |
| 283375 | NM_001135195,NM_173596                  | SLC39A5   | solute carrier family 39 member 5                             | -2.162040 | 0.00039528  |
| 51091  | NM_016955                               | SEPSECS   | Sep (O-phosphoserine) tRNA:Sec (selenocysteine) tRNA synthase | -2.167899 | 3.59988E-14 |
| 51646  | NM_001127399,NM_001127400,NM_001127401, | YPEL5     | yippee like 5                                                 | -2.168425 | 3.80066E-27 |

|           |                                                                                                                                                          |             |                                            |           |             |
|-----------|----------------------------------------------------------------------------------------------------------------------------------------------------------|-------------|--------------------------------------------|-----------|-------------|
|           | NM_016061                                                                                                                                                |             |                                            |           |             |
| 100271722 | NR_027036                                                                                                                                                | LINC00899   | long intergenic non-protein coding RNA 899 | -2.175730 | 0.002478481 |
| 100507410 | NR_040018,NR_040019                                                                                                                                      | C1QTNF1-AS1 | C1QTNF1 antisense RNA 1                    | -2.178109 | 0.02584857  |
| 9886      | NM_001242359,NM_001350902,NM_001350903,NM_001350904,NM_001350905,NM_001350906,NM_001350907,NM_001350908,NM_001350909,NM_001350910,NM_001350911,NM_014836 | RHOBTB1     | Rho related BTB domain containing 1        | -2.180782 | 0.000215245 |
| 285512    | NR_002806                                                                                                                                                | FAM13A-AS1  | FAM13A antisense RNA 1                     | -2.181430 | 0.005921307 |
| 114907    | NM_001242463,NM_058229,NM_148177                                                                                                                         | FBXO32      | F-box protein 32                           | -2.184331 | 2.48497E-13 |
| 9630      | NM_004297                                                                                                                                                | GNA14       | G protein subunit alpha 14                 | -2.187301 | 1.19399E-05 |
| 196883    | NM_001198568,NM_001198592,NM_139247                                                                                                                      | ADCY4       | adenylate cyclase 4                        | -2.200861 | 0.011996594 |
| 80318     | NM_001135953,NM_025211                                                                                                                                   | GKAP1       | G kinase anchoring protein 1               | -2.201255 | 0.001247979 |
| 79845     | NM_024787                                                                                                                                                | RNF122      | ring finger protein 122                    | -2.202172 | 0.000791241 |
| 283487    | NR_027701                                                                                                                                                | LINC00346   | long intergenic non-protein coding RNA 346 | -2.202225 | 6.88909E-17 |
| 3174      | NM_001330561,NM_004133                                                                                                                                   | HNF4G       | hepatocyte nuclear factor 4 gamma          | -2.204547 | 0.001339568 |

|        |                                                                           |         |                                                                                  |           |             |
|--------|---------------------------------------------------------------------------|---------|----------------------------------------------------------------------------------|-----------|-------------|
| 149076 | NM_152493                                                                 | ZNF362  | zinc finger protein 362                                                          | -2.206522 | 0.012235337 |
| 26150  | NM_015653                                                                 | RIBC2   | RIB43A domain with coiled-coils 2                                                | -2.210808 | 8.65237E-06 |
| 6821   | NM_000456,NM_001032<br>386,NM_001032387                                   | SUOX    | sulfite oxidase                                                                  | -2.214526 | 5.28456E-20 |
| 28984  | NM_014059                                                                 | RGCC    | regulator of cell cycle                                                          | -2.227335 | 2.97294E-17 |
| 64599  | NM_022574                                                                 | GIGYF1  | GRB10 interacting GYF protein 1                                                  | -2.228137 | 1.18102E-49 |
| 220972 | NM_001002266,NM_001<br>282866,NM_145021                                   | MARCH8  | membrane associated ring-CH-type finger 8                                        | -2.228404 | 2.25163E-23 |
| 127733 | NM_152376                                                                 | UBXN10  | UBX domain protein 10                                                            | -2.231835 | 0.000261702 |
| 55139  | NM_001042410,NM_001<br>282792,NM_018089                                   | ANKZF1  | ankyrin repeat and zinc finger domain containing<br>1                            | -2.236661 | 7.41849E-22 |
| 134548 | NM_175873                                                                 | SOWAHA  | sosondowah ankyrin repeat domain family<br>member A                              | -2.241501 | 7.19251E-06 |
| 10608  | NM_006454                                                                 | MXD4    | MAX dimerization protein 4                                                       | -2.241963 | 3.41665E-16 |
| 115294 | NM_001286782,NM_001<br>286783,NM_052937                                   | PCMTD1  | protein-L-isoaspartate (D-aspartate) O-<br>methyltransferase domain containing 1 | -2.244913 | 7.61926E-20 |
| 151354 | NM_145175,NR_144632                                                       | FAM84A  | family with sequence similarity 84 member A                                      | -2.245149 | 0.038237108 |
| 204962 | NM_001130058,NM_001<br>320283,NM_001320285,<br>NM_001320287,NM_152<br>697 | SLC44A5 | solute carrier family 44 member 5                                                | -2.249465 | 0.000554533 |
| 6666   | NM_006943                                                                 | SOX12   | SRY-box 12                                                                       | -2.249658 | 5.4238E-10  |



|           |                                                                                                                   |           |                                             |           |             |
|-----------|-------------------------------------------------------------------------------------------------------------------|-----------|---------------------------------------------|-----------|-------------|
| 400604    | NR_038458                                                                                                         | TOB1-AS1  | TOB1 antisense RNA 1                        | -2.256836 | 0.017537788 |
| 100124700 | NR_003716,NR_047517,<br>NR_047518                                                                                 | HOTAIR    | HOX transcript antisense RNA                | -2.257685 | 5.06804E-16 |
| 284390    | NM_001012753                                                                                                      | ZNF763    | zinc finger protein 763                     | -2.260494 | 0.013317031 |
| 570       | NM_001127610,NM_001<br>701                                                                                        | BAAT      | bile acid-CoA:amino acid N-acyltransferase  | -2.260856 | 0.033326379 |
| 57730     | NM_025190                                                                                                         | ANKRD36B  | ankyrin repeat domain 36B                   | -2.264712 | 1.07905E-05 |
| 102724312 | NR_125994,NR_125995,<br>NR_125996                                                                                 | LINC01770 | long intergenic non-protein coding RNA 1770 | -2.265327 | 0.014941503 |
| 54756     | NM_001318864,NM_017<br>563                                                                                        | IL17RD    | interleukin 17 receptor D                   | -2.267450 | 0.001669179 |
| 79960     | NM_001287437,NM_001<br>287439,NM_001287440,<br>NM_001287441,NM_001<br>287442,NM_001287443,<br>NM_024900,NM_199320 | JADE1     | jade family PHD finger 1                    | -2.269989 | 2.9427E-20  |
| 352954    | NM_178831,NR_028038,<br>NR_028039,NR_028040                                                                       | GATS      | GATS, stromal antigen 3 opposite strand     | -2.270613 | 7.88552E-07 |
| 80325     | NM_032548,NM_172027<br>,NR_033429                                                                                 | ABTB1     | ankyrin repeat and BTB domain containing 1  | -2.271957 | 7.75595E-13 |
| 114991    | NM_001318040,NM_001<br>318041,NM_001318042,<br>NM_133374                                                          | ZNF618    | zinc finger protein 618                     | -2.277017 | 0.030423106 |
| 101927992 | NR_110167,NR_110168                                                                                               | LINC01213 | long intergenic non-protein coding RNA 1213 | -2.278970 | 0.047916026 |

|           |                                                                            |           |                                                                                |           |             |
|-----------|----------------------------------------------------------------------------|-----------|--------------------------------------------------------------------------------|-----------|-------------|
| 4322      | NM_002427                                                                  | MMP13     | matrix metalloproteinase 13                                                    | -2.279576 | 0.004454246 |
| 133746    | NM_152405                                                                  | JMY       | junction mediating and regulatory protein, p53 cofactor                        | -2.280108 | 2.06007E-18 |
| 57161     | NM_021255                                                                  | PELI2     | pellino E3 ubiquitin protein ligase family member 2                            | -2.280483 | 4.03992E-11 |
| 3434      | NM_001270927,NM_001270928,NM_001270929,NM_001270930,NM_001548              | IFIT1     | interferon induced protein with tetratricopeptide repeats 1                    | -2.290621 | 0.001362062 |
| 401303    | NR_023382                                                                  | ZNF815P   | zinc finger protein 815, pseudogene                                            | -2.291867 | 0.023682719 |
| 124751    | NM_001304947,NM_213597                                                     | KRBA2     | KRAB-A domain containing 2                                                     | -2.293726 | 0.020057257 |
| 100616668 | NR_038258,NR_038259                                                        | TPTE2P5   | transmembrane phosphoinositide 3-phosphatase and tensin homolog 2 pseudogene 5 | -2.309969 | 0.00062962  |
| 402415    | NM_212559                                                                  | XKRX      | XK related, X-linked                                                           | -2.310187 | 3.93569E-07 |
| 4215      | NM_001330431,NM_002401,NM_203351                                           | MAP3K3    | mitogen-activated protein kinase kinase kinase 3                               | -2.310507 | 1.82084E-30 |
| 84733     | NM_005189,NM_032647                                                        | CBX2      | chromobox 2                                                                    | -2.311330 | 1.7886E-15  |
| 118738    | NM_001346932,NM_001346933,NM_001346934,NM_001346935,NM_001346936,NM_153034 | ZNF488    | zinc finger protein 488                                                        | -2.313317 | 8.10866E-19 |
| 8348      | NM_003527                                                                  | HIST1H2BO | histone cluster 1 H2B family member o                                          | -2.316296 | 0.046459541 |

|           |                                                                            |           |                                                                                 |           |             |
|-----------|----------------------------------------------------------------------------|-----------|---------------------------------------------------------------------------------|-----------|-------------|
| 6519      | NM_000341                                                                  | SLC3A1    | solute carrier family 3 member 1                                                | -2.321827 | 0.001054527 |
| 29125     | NM_001142946,NM_001329958,NR_138249                                        | C11orf21  | chromosome 11 open reading frame 21                                             | -2.331612 | 1.17105E-05 |
| 10902     | NM_001164326,NM_001300961,NM_001300962,NM_001300966,NM_006696,NM_139199    | BRD8      | bromodomain containing 8                                                        | -2.333195 | 5.21466E-54 |
| 102724668 | NR_132360                                                                  | DPY19L1P2 | DPY19L1 pseudogene 2                                                            | -2.333789 | 0.002143857 |
| 400986    | NM_001310154                                                               | ANKRD36C  | ankyrin repeat domain 36C                                                       | -2.338402 | 5.29251E-09 |
| 8876      | NM_004666                                                                  | VNN1      | vanin 1                                                                         | -2.340783 | 7.83308E-14 |
| 10370     | NM_001168388,NM_001168389,NM_006079                                        | CITED2    | Cbp/p300 interacting transactivator with Glu/Asp rich carboxy-terminal domain 2 | -2.341017 | 4.08201E-07 |
| 64714     | NM_006849                                                                  | PDIA2     | protein disulfide isomerase family A member 2                                   | -2.348433 | 0.040182737 |
| 140738    | NM_183240                                                                  | TMEM37    | transmembrane protein 37                                                        | -2.359163 | 5.68729E-05 |
| 147011    | NM_001304949,NM_001304951,NM_001304952,NM_001304953,NM_001304954,NM_152465 | PROCA1    | protein interacting with cyclin A1                                              | -2.368852 | 0.013775294 |
| 115330    | NM_001303473,NM_001303474,NM_138445                                        | GPR146    | G protein-coupled receptor 146                                                  | -2.372495 | 0.001718771 |
| 440925    | NR_027433                                                                  | LINC01124 | long intergenic non-protein coding RNA 1124                                     | -2.376814 | 0.033080961 |
| 100528020 | NM_001258400                                                               | FAM187A   | family with sequence similarity 187 member A                                    | -2.379458 | 0.009543882 |
| 83463     | NM_001142935,NM_031                                                        | MXD3      | MAX dimerization protein 3                                                      | -2.389761 | 1.36225E-12 |

|           |                                                            |              |                                                   |           |             |
|-----------|------------------------------------------------------------|--------------|---------------------------------------------------|-----------|-------------|
|           | 300                                                        |              |                                                   |           |             |
| 91461     | NM_138370                                                  | PKDCC        | protein kinase domain containing, cytoplasmic     | -2.401468 | 8.11275E-27 |
| 154043    | NM_173515                                                  | CNKSR3       | CNKSR family member 3                             | -2.402465 | 0.043080157 |
| 84961     | NM_001184906,NM_032875                                     | FBXL20       | F-box and leucine rich repeat protein 20          | -2.403562 | 1.8629E-14  |
| 93        | NM_001106                                                  | ACVR2B       | activin A receptor type 2B                        | -2.409027 | 3.55837E-13 |
| 54943     | NM_001040192,NM_001320746,NM_017833                        | DNAJC28      | DnaJ heat shock protein family (Hsp40) member C28 | -2.412128 | 0.006352032 |
| 143879    | NM_001330359,NM_152433,NM_198439                           | KBTBD3       | kelch repeat and BTB domain containing 3          | -2.417332 | 9.41365E-10 |
| 9771      | NM_012294                                                  | RAPGEF5      | Rap guanine nucleotide exchange factor 5          | -2.417745 | 8.66078E-12 |
| 55315     | NM_001174098,NM_018344,NR_033413,NR_033414                 | SLC29A3      | solute carrier family 29 member 3                 | -2.418928 | 3.99723E-18 |
| 154743    | NM_152556                                                  | BMT2         | base methyltransferase of 25S rRNA 2 homolog      | -2.426491 | 0.014408993 |
| 7754      | NR_002722,NR_024553                                        | ZNF204P      | zinc finger protein 204, pseudogene               | -2.426797 | 0.010593222 |
| 55088     | NM_001321829,NM_018017,NM_153249,NR_135815                 | CCDC186      | coiled-coil domain containing 186                 | -2.443778 | 0.000349256 |
| 100130111 | NR_135221                                                  | LOC100130111 | uncharacterized LOC100130111                      | -2.449293 | 0.007216856 |
| 9991      | NM_001163788,NM_001163790,NM_001244896,NM_001244897,NM_001 | PTBP3        | polypyrimidine tract binding protein 3            | -2.453560 | 0.000131965 |

|        |                                                                                                                                                                                                 |           |                                                               |           |             |
|--------|-------------------------------------------------------------------------------------------------------------------------------------------------------------------------------------------------|-----------|---------------------------------------------------------------|-----------|-------------|
|        | 244898,NM_005156                                                                                                                                                                                |           |                                                               |           |             |
| 9514   | NM_001318103,NM_001318104,NM_001318105,NM_001318106,NM_001318107,NM_001318108,NM_001318109,NM_001318110,NM_001318111,NM_001318112,NM_001318113,NM_001318114,NM_001318115,NM_001318116,NM_004861 | GAL3ST1   | galactose-3-O-sulfotransferase 1                              | -2.458083 | 0.017858932 |
| 9403   | NM_004261,NM_203341,NR_144512,NR_144513                                                                                                                                                         | SELENOF   | selenoprotein F                                               | -2.466224 | 7.5777E-15  |
| 147912 | NM_175875                                                                                                                                                                                       | SIX5      | SIX homeobox 5                                                | -2.467148 | 0.025067505 |
| 8329   | NM_003509                                                                                                                                                                                       | HIST1H2AI | histone cluster 1 H2A family member i                         | -2.471876 | 7.18526E-52 |
| 135932 | NM_001242773,NM_001242774,NM_001242775,NM_001282876,NM_001282877,NM_153345,NR_040003,NR_104250,NR_104251,NR_104252,NR_104253,NR_104254                                                          | TMEM139   | transmembrane protein 139                                     | -2.471911 | 5.6762E-07  |
| 81788  | NM_030952                                                                                                                                                                                       | NUAK2     | NUAK family kinase 2                                          | -2.474398 | 9.69344E-05 |
| 59084  | NM_001290072,NM_001290073,NM_021572                                                                                                                                                             | ENPP5     | ectonucleotide pyrophosphatase/phosphodiesterase 5 (putative) | -2.484850 | 8.75401E-05 |
| 167691 | NM_001122769,NM_181714                                                                                                                                                                          | LCA5      | LCA5, lebercilin                                              | -2.495208 | 4.07752E-33 |

|           |                                                       |           |                                                   |           |             |
|-----------|-------------------------------------------------------|-----------|---------------------------------------------------|-----------|-------------|
| 30061     | NM_014585                                             | SLC40A1   | solute carrier family 40 member 1                 | -2.498155 | 5.87674E-06 |
| 8654      | NM_001083,NM_033430,<br>NM_033437                     | PDE5A     | phosphodiesterase 5A                              | -2.502272 | 0.000932274 |
| 284618    | NR_145424,NR_145425,<br>NR_145426                     | RUSC1-AS1 | RUSC1 antisense RNA 1                             | -2.524967 | 0.000932274 |
| 79946     | NM_024886                                             | C10orf95  | chromosome 10 open reading frame 95               | -2.534914 | 0.000114352 |
| 25928     | NM_015464                                             | SOSTDC1   | sclerostin domain containing 1                    | -2.539003 | 5.86385E-26 |
| 126272    | NM_152361                                             | EID2B     | EP300 interacting inhibitor of differentiation 2B | -2.549883 | 1.11269E-05 |
| 79849     | NM_001168468,NM_024<br>791,NR_033122                  | PDZD3     | PDZ domain containing 3                           | -2.554129 | 0.000967466 |
| 11119     | NM_001145008,NM_001<br>145009,NM_007048,NM<br>_194441 | BTN3A1    | butyrophilin subfamily 3 member A1                | -2.554760 | 2.69389E-07 |
| 286336    | NM_033387                                             | FAM78A    | family with sequence similarity 78 member A       | -2.568446 | 0.00158276  |
| 100506810 | NR_038856                                             | LINC01132 | long intergenic non-protein coding RNA 1132       | -2.570257 | 0.000463126 |
| 143686    | NM_001271594,NM_144<br>665                            | SESN3     | sestrin 3                                         | -2.592892 | 1.33262E-09 |
| 1028      | NM_000076,NM_001122<br>630,NM_001122631               | CDKN1C    | cyclin dependent kinase inhibitor 1C              | -2.593241 | 1.9419E-07  |
| 3223      | NM_004503,NM_153693                                   | HOXC6     | homeobox C6                                       | -2.595161 | 1.24019E-11 |
| 84787     | NM_032701                                             | KMT5C     | lysine methyltransferase 5C                       | -2.598620 | 4.42057E-17 |
| 8660      | NM_003749                                             | IRS2      | insulin receptor substrate 2                      | -2.605179 | 1.28541E-32 |

|        |                                                                                                                                                              |           |                                             |           |             |
|--------|--------------------------------------------------------------------------------------------------------------------------------------------------------------|-----------|---------------------------------------------|-----------|-------------|
| 146330 | NM_153350                                                                                                                                                    | FBXL16    | F-box and leucine rich repeat protein 16    | -2.606690 | 0.026971021 |
| 1740   | NM_001142699,NM_001142700,NM_001142702,NM_001206769,NM_001300983,NM_001351274,NM_001351275,NM_001351276,NM_001364                                            | DLG2      | discs large MAGUK scaffold protein 2        | -2.607109 | 0.018118117 |
| 55701  | NM_001278529,NM_001278530,NM_018071                                                                                                                          | ARHGEF40  | Rho guanine nucleotide exchange factor 40   | -2.608894 | 8.66911E-14 |
| 2263   | NM_000141,NM_001144913,NM_001144914,NM_001144915,NM_001144916,NM_001144917,NM_001144918,NM_001144919,NM_001320654,NM_001320658,NM_022970,NM_023029,NR_073009 | FGFR2     | fibroblast growth factor receptor 2         | -2.613216 | 9.81768E-39 |
| 4661   | NM_004535                                                                                                                                                    | MYT1      | myelin transcription factor 1               | -2.615672 | 1.89428E-08 |
| 130574 | NM_001195685,NM_194317                                                                                                                                       | LYPD6     | LY6/PLAUR domain containing 6               | -2.619840 | 0.000347725 |
| 1942   | NM_004428,NM_182685                                                                                                                                          | EFNA1     | ephrin A1                                   | -2.621528 | 8.00619E-17 |
| 23401  | NM_012083                                                                                                                                                    | FRAT2     | FRAT2, WNT signaling pathway regulator      | -2.633235 | 3.06363E-37 |
| 80054  | NR_026887                                                                                                                                                    | CEBPA-AS1 | CEBPA antisense RNA 1 (head to head)        | -2.638252 | 0.006751532 |
| 389384 | NM_001010903                                                                                                                                                 | C6orf222  | chromosome 6 open reading frame 222         | -2.649366 | 0.011335988 |
| 3760   | NM_001260508,NM_001                                                                                                                                          | KCNJ3     | potassium voltage-gated channel subfamily J | -2.667285 | 3.01243E-05 |

|        |                                                                                        |          |                                                                              |           |             |
|--------|----------------------------------------------------------------------------------------|----------|------------------------------------------------------------------------------|-----------|-------------|
|        | 260509,NM_001260510,<br>NM_002239                                                      |          | member 3                                                                     |           |             |
| 284358 | NM_001130915,NM_001<br>297753,NM_182574                                                | MAMSTR   | MEF2 activating motif and SAP domain<br>containing transcriptional regulator | -2.672769 | 0.026086725 |
| 65986  | NM_001105539,NM_001<br>277145,NM_023929                                                | ZBTB10   | zinc finger and BTB domain containing 10                                     | -2.673234 | 7.60627E-07 |
| 219699 | NM_001244889,NM_170<br>744                                                             | UNC5B    | unc-5 netrin receptor B                                                      | -2.673535 | 0.03534963  |
| 29799  | NM_013313,NR_130910                                                                    | YPEL1    | yippee like 1                                                                | -2.673668 | 0.007879739 |
| 283991 | NM_182565                                                                              | UBALD2   | UBA like domain containing 2                                                 | -2.676700 | 1.09832E-42 |
| 10891  | NM_001330751,NM_001<br>330752,NM_001330753,<br>NM_013261                               | PPARGC1A | PPARG coactivator 1 alpha                                                    | -2.688221 | 0.015216456 |
| 717    | NM_000063,NM_001145<br>903,NM_001178063,NM<br>_001282457,NM_001282<br>458,NM_001282459 | C2       | complement C2                                                                | -2.688533 | 0.042622263 |
| 2535   | NM_001466                                                                              | FZD2     | frizzled class receptor 2                                                    | -2.697310 | 0.022482127 |
| 27244  | NM_001199933,NM_001<br>199934,NM_014454                                                | SESN1    | sestrin 1                                                                    | -2.702948 | 6.68626E-32 |
| 2444   | NM_002031                                                                              | FRK      | fyn related Src family tyrosine kinase                                       | -2.703613 | 5.55622E-08 |
| 84206  | NM_032246                                                                              | MEX3B    | mex-3 RNA binding family member B                                            | -2.708792 | 2.44099E-05 |
| 474    | NM_005172                                                                              | ATOH1    | atonal bHLH transcription factor 1                                           | -2.714553 | 0.048335564 |



|        |                                               |         |                                                     |           |             |
|--------|-----------------------------------------------|---------|-----------------------------------------------------|-----------|-------------|
| 125170 | NM_001144900,NM_139162,NM_148886              | MIEF2   | mitochondrial elongation factor 2                   | -2.728930 | 2.78143E-22 |
| 2043   | NM_001304536,NM_001304537,NM_004438           | EPHA4   | EPH receptor A4                                     | -2.730931 | 0.001427588 |
| 55766  | NM_177925,NR_027716                           | H2AFJ   | H2A histone family member J                         | -2.735505 | 0.009835064 |
| 114819 | NR_023386                                     | CROCCP3 | ciliary rootlet coiled-coil, rootletin pseudogene 3 | -2.736574 | 0.010351538 |
| 348110 | NM_001282380,NM_182616                        | ARPIN   | actin related protein 2/3 complex inhibitor         | -2.747527 | 0.00885157  |
| 23177  | NM_001319100,NM_001319101,NM_015147,NR_134966 | CEP68   | centrosomal protein 68                              | -2.752612 | 1.47993E-15 |
| 84666  | NM_032579                                     | RETNLB  | resistin like beta                                  | -2.758334 | 0.029137107 |
| 3718   | NM_000215                                     | JAK3    | Janus kinase 3                                      | -2.761517 | 0.006924549 |
| 8408   | NM_003565                                     | ULK1    | unc-51 like autophagy activating kinase 1           | -2.762410 | 2.56789E-26 |
| 65249  | NM_023072                                     | ZSWIM4  | zinc finger SWIM-type containing 4                  | -2.773544 | 2.12668E-11 |
| 55281  | NM_018295                                     | TMEM140 | transmembrane protein 140                           | -2.788289 | 6.88356E-07 |
| 3660   | NM_002199                                     | IRF2    | interferon regulatory factor 2                      | -2.789128 | 2.7927E-24  |
| 126375 | NM_175872                                     | ZNF792  | zinc finger protein 792                             | -2.798913 | 1.49879E-21 |
| 79818  | NM_024762                                     | ZNF552  | zinc finger protein 552                             | -2.799453 | 1.86956E-54 |
| 56670  | NM_033050                                     | SUCNR1  | succinate receptor 1                                | -2.827494 | 0.00690467  |
| 165679 | NM_001040100,NM_001                           | SPTSSB  | serine palmitoyltransferase small subunit B         | -2.831953 | 7.01767E-11 |

|           |                                                                                           |                  |                                                             |                          |             |
|-----------|-------------------------------------------------------------------------------------------|------------------|-------------------------------------------------------------|--------------------------|-------------|
|           | 320679                                                                                    |                  |                                                             |                          |             |
| 2306      | NM_004474                                                                                 | FOXD2            | forkhead box D2                                             | -2.843108                | 0.000685896 |
| 4207      | NM_005919,NR_027307,<br>NR_027308                                                         | BORCS8-<br>MEF2B | BORCS8-MEF2B readthrough                                    | -2.850215                | 0.00114767  |
| 3268      | NM_006076                                                                                 | AGFG2            | ArfGAP with FG repeats 2                                    | -2.860336                | 3.86808E-40 |
| 374907    | NM_198540                                                                                 | B3GNT8           | UDP-GlcNAc:betaGal<br>acetylglucosaminyltransferase 8       | beta-1,3-N-<br>-2.919425 | 0.000510872 |
| 80853     | NM_030647                                                                                 | KDM7A            | lysine demethylase 7A                                       | -2.934733                | 1.00551E-14 |
| 80352     | NM_025236,NM_170769                                                                       | RNF39            | ring finger protein 39                                      | -2.942031                | 1.80397E-14 |
| 19        | NM_005502                                                                                 | ABCA1            | ATP binding cassette subfamily A member 1                   | -2.955145                | 5.42155E-10 |
| 9881      | NM_001329998,NM_014<br>831                                                                | TRANK1           | tetratricopeptide repeat and ankyrin repeat<br>containing 1 | -2.961427                | 3.22205E-11 |
| 23024     | NM_001303139,NM_001<br>303140,NM_001303141,<br>NM_001303142,NM_015<br>009                 | PDZRN3           | PDZ domain containing ring finger 3                         | -2.972782                | 0.010393088 |
| 100506286 | NR_135594                                                                                 | TBC1D8-AS1       | TBC1 domain family member 8 antisense RNA 1                 | -2.974644                | 0.044748603 |
| 10420     | NM_001320800,NM_007<br>170                                                                | TESK2            | testis-specific kinase 2                                    | -2.984387                | 7.63007E-13 |
| 5727      | NM_000264,NM_001083<br>602,NM_001083603,NM<br>_001083604,NM_001083<br>605,NM_001083606,NM | PTCH1            | patched 1                                                   | -2.986625                | 4.0569E-29  |

|           |                                                  |              |                                                 |           |             |
|-----------|--------------------------------------------------|--------------|-------------------------------------------------|-----------|-------------|
|           | _001083607                                       |              |                                                 |           |             |
| 85442     | NM_001347864,NM_001347865,NM_001347866,NM_152643 | KNDC1        | kinase non-catalytic C-lobe domain containing 1 | -2.992794 | 0.044369232 |
| 285513    | NM_198281                                        | GPRIN3       | GPRIN family member 3                           | -3.000192 | 0.000354113 |
| 51063     | NM_015916,NR_024552,NR_046344                    | CALHM2       | calcium homeostasis modulator 2                 | -3.037424 | 7.2267E-13  |
| 7049      | NM_001195683,NM_001195684,NM_003243,NR_036634    | TGFBR3       | transforming growth factor beta receptor 3      | -3.067500 | 2.15318E-24 |
| 6097      | NM_001001523,NM_005060                           | RORC         | RAR related orphan receptor C                   | -3.075268 | 0.002841719 |
| 100534593 | NR_037945                                        | STX16-NPEPL1 | STX16-NPEPL1 readthrough (NMD candidate)        | -3.076024 | 0.043360316 |
| 10628     | NM_001313972,NM_006472                           | TXNIP        | thioredoxin interacting protein                 | -3.084861 | 1.0095E-70  |
| 57507     | NM_020747                                        | ZNF608       | zinc finger protein 608                         | -3.090785 | 5.36674E-14 |
| 375287    | NM_198557                                        | RBM43        | RNA binding motif protein 43                    | -3.091632 | 1.88485E-09 |
| 140893    | NM_080833                                        | RBBP8NL      | RBBP8 N-terminal like                           | -3.093956 | 1.47184E-17 |
| 9754      | NM_001142503,NM_001142504,NM_014725              | STARD8       | StAR related lipid transfer domain containing 8 | -3.106016 | 0.001463871 |
| 100873955 | NR_046827                                        | LNK1-AS2     | LNK1 antisense RNA 2                            | -3.123020 | 0.035858437 |
| 440028    | NR_033972                                        | LOC440028    | uncharacterized LOC440028                       | -3.207169 | 0.01805221  |

|           |                                                                            |              |                                                                  |           |             |
|-----------|----------------------------------------------------------------------------|--------------|------------------------------------------------------------------|-----------|-------------|
| 145788    | NM_001198784                                                               | C15orf65     | chromosome 15 open reading frame 65                              | -3.212430 | 8.761E-10   |
| 10008     | NM_005472                                                                  | KCNE3        | potassium voltage-gated channel subfamily E regulatory subunit 3 | -3.219440 | 1.85775E-62 |
| 151050    | NM_001307976,NM_152519                                                     | KANSL1L      | KAT8 regulatory NSL complex subunit 1 like                       | -3.234456 | 3.44694E-26 |
| 153222    | NM_001168393,NM_001168394,NM_153607                                        | CREBRF       | CREB3 regulatory factor                                          | -3.239445 | 3.50897E-24 |
| 7294      | NM_003328                                                                  | TXK          | TXK tyrosine kinase                                              | -3.240078 | 2.3484E-05  |
| 84708     | NM_001126328,NM_032622                                                     | LNK1         | ligand of numb-protein X 1                                       | -3.290444 | 7.94185E-17 |
| 171523    | NR_144551                                                                  | CYP2T1P      | cytochrome P450 family 2 subfamily T member 1, pseudogene        | -3.294667 | 0.001595813 |
| 57687     | NM_020927                                                                  | VAT1L        | vesicle amine transport 1 like                                   | -3.296776 | 0.025507207 |
| 101926935 | NR_110001                                                                  | LOC101926935 | uncharacterized LOC101926935                                     | -3.299285 | 0.034718238 |
| 255488    | NM_182757                                                                  | RNF144B      | ring finger protein 144B                                         | -3.300364 | 4.4358E-17  |
| 25822     | NM_001135004,NM_001135005,NM_001349723,NM_001349724,NM_001349725,NM_012266 | DNAJB5       | DnaJ heat shock protein family (Hsp40) member B5                 | -3.312979 | 0.000758635 |
| 53349     | NM_001281734,NM_001281735,NM_021260,NM_178441                              | ZFYVE1       | zinc finger FYVE-type containing 1                               | -3.313566 | 3.0934E-14  |
| 54823     | NM_001105518,NM_017                                                        | SWT1         | SWT1, RNA endoribonuclease homolog                               | -3.319670 | 1.11297E-14 |

|       |                                                                                                                                                                                                                                                                                                                                                                                                                         |       |                                                                     |           |             |
|-------|-------------------------------------------------------------------------------------------------------------------------------------------------------------------------------------------------------------------------------------------------------------------------------------------------------------------------------------------------------------------------------------------------------------------------|-------|---------------------------------------------------------------------|-----------|-------------|
|       | 673                                                                                                                                                                                                                                                                                                                                                                                                                     |       |                                                                     |           |             |
| 1944  | NM_004952                                                                                                                                                                                                                                                                                                                                                                                                               | EFNA3 | ephrin A3                                                           | -3.325570 | 5.31672E-08 |
| 4857  | NM_002515,NM_006489<br>,NM_006491                                                                                                                                                                                                                                                                                                                                                                                       | NOVA1 | NOVA alternative splicing regulator 1                               | -3.339821 | 0.000200658 |
| 55503 | NM_018646                                                                                                                                                                                                                                                                                                                                                                                                               | TRPV6 | transient receptor potential cation channel<br>subfamily V member 6 | -3.340315 | 0.005898967 |
| 4013  | NM_001130142,NM_014<br>622,NM_198315                                                                                                                                                                                                                                                                                                                                                                                    | VWA5A | von Willebrand factor A domain containing 5A                        | -3.365078 | 0.001643032 |
| 868   | NM_001321786,NM_001<br>321788,NM_001321789,<br>NM_001321790,NM_001<br>321791,NM_001321793,<br>NM_001321794,NM_001<br>321795,NM_001321796,<br>NM_001321797,NM_001<br>321798,NM_001321799,<br>NM_001321806,NM_001<br>321807,NM_001321808,<br>NM_001321811,NM_001<br>321813,NM_001321816,<br>NM_001321820,NM_001<br>321822,NM_170662,NR_<br>135806,NR_135807,NR_<br>135808,NR_135809,NR_<br>135810,NR_135811,NR_<br>135812 | CBLB  | Cbl proto-oncogene B                                                | -3.390710 | 1.35928E-30 |
| 9469  | NM_004273                                                                                                                                                                                                                                                                                                                                                                                                               | CHST3 | carbohydrate sulfotransferase 3                                     | -3.410704 | 3.83179E-25 |
| 5013  | NM_001199770,NM_014                                                                                                                                                                                                                                                                                                                                                                                                     | OTX1  | orthodenticle homeobox 1                                            | -3.411997 | 6.94002E-21 |

|           |                                                                      |              |                                                |           |             |
|-----------|----------------------------------------------------------------------|--------------|------------------------------------------------|-----------|-------------|
|           | 562,NR_130153                                                        |              |                                                |           |             |
| 283209    | NM_173582                                                            | PGM2L1       | phosphoglucomutase 2 like 1                    | -3.445653 | 3.16046E-27 |
| 153020    | NM_001300735,NM_001300736,NM_152545                                  | RASGEF1B     | RasGEF domain family member 1B                 | -3.472613 | 0.000788974 |
| 105371267 | NR_136518,NR_147075                                                  | LOC105371267 | p53-regulated lncRNA 1                         | -3.492232 | 0.002132294 |
| 5801      | NM_001207015,NM_001207016,NM_002849,NM_130846,NR_073474              | PTPRR        | protein tyrosine phosphatase, receptor type R  | -3.510118 | 2.05113E-09 |
| 79170     | NM_024320                                                            | PRR15L       | proline rich 15 like                           | -3.573185 | 5.90928E-35 |
| 399821    | NR_033847                                                            | FLJ37035     | uncharacterized LOC399821                      | -3.576616 | 0.004478795 |
| 107984921 | NR_147210,NR_147211                                                  | LINC01772    | long intergenic non-protein coding RNA 1772    | -3.583718 | 0.013454015 |
| 54567     | NM_019074                                                            | DLL4         | delta like canonical Notch ligand 4            | -3.587507 | 3.276E-05   |
| 344657    | NM_001080460                                                         | LRRIQ4       | leucine rich repeats and IQ motif containing 4 | -3.615424 | 0.03454247  |
| 63982     | NM_001313726,NM_001313727,NM_031418                                  | ANO3         | anoctamin 3                                    | -3.642441 | 1.04356E-06 |
| 10194     | NM_001308210,NM_005786                                               | TSHZ1        | teashirt zinc finger homeobox 1                | -3.672204 | 1.98876E-53 |
| 1375      | NM_001145134,NM_001145135,NM_001145137,NM_004377,NM_152245,NM_152246 | CPT1B        | carnitine palmitoyltransferase 1B              | -3.708857 | 0.00017869  |
| 152926    | NM_152542                                                            | PPM1K        | protein phosphatase, Mg2+/Mn2+ dependent 1K    | -3.716329 | 6.94867E-18 |

|           |                                     |                       |                                               |           |             |
|-----------|-------------------------------------|-----------------------|-----------------------------------------------|-----------|-------------|
| 604       | NM_001130845,NM_001134738,NM_001706 | BCL6                  | B-cell CLL/lymphoma 6                         | -3.717538 | 6.06496E-45 |
| 389058    | NM_001003845                        | SP5                   | Sp5 transcription factor                      | -3.720096 | 6.4749E-10  |
| 389072    | NM_001080475                        | PLEKHM3               | pleckstrin homology domain containing M3      | -3.739233 | 2.41548E-34 |
| 6792      | NM_001037343,NM_001323289,NM_003159 | CDKL5                 | cyclin dependent kinase like 5                | -3.765903 | 0.047342476 |
| 5453      | NM_002699                           | POU3F1                | POU class 3 homeobox 1                        | -3.769029 | 2.09873E-07 |
| 56204     | NM_001286495,NM_019600,NR_104457    | FAM214A               | family with sequence similarity 214 member A  | -3.773881 | 6.35323E-18 |
| 83719     | NM_001145524,NM_031477              | YPEL3                 | yippee like 3                                 | -3.822659 | 5.60645E-25 |
| 100129722 | NR_038389                           | STPG3-AS1             | STPG3 antisense RNA 1                         | -3.861565 | 0.013701609 |
| 8431      | NM_021969                           | NR0B2                 | nuclear receptor subfamily 0 group B member 2 | -3.867591 | 3.99944E-07 |
| 8000      | NM_005672,NR_033343                 | PSCA                  | prostate stem cell antigen                    | -4.014668 | 1.61752E-23 |
| 1906      | NM_001168319,NM_001955              | EDN1                  | endothelin 1                                  | -4.087919 | 4.91257E-76 |
| 57653     | NR_036527,NR_036528,NR_036529       | LOC100499484-C9ORF174 | LOC100499484-C9orf174 readthrough             | -4.136917 | 0.001180688 |
| 388403    | NM_001005404                        | YPEL2                 | yippee like 2                                 | -4.174225 | 6.67509E-27 |
| 8360      | NM_003539                           | HIST1H4D              | histone cluster 1 H4 family member d          | -4.208971 | 0.005652673 |
| 84189     | NM_032229                           | SLITRK6               | SLIT and NTRK like family member 6            | -4.209327 | 1.87E-65    |

|        |                                                                                                                                                                                      |          |                                                            |           |             |
|--------|--------------------------------------------------------------------------------------------------------------------------------------------------------------------------------------|----------|------------------------------------------------------------|-----------|-------------|
| 353355 | NM_001207005,NM_001330529,NM_181756                                                                                                                                                  | ZNF233   | zinc finger protein 233                                    | -4.309364 | 2.65129E-07 |
| 8743   | NM_001190942,NM_001190943,NM_003810,NR_033994                                                                                                                                        | TNFSF10  | TNF superfamily member 10                                  | -4.366161 | 1.56307E-33 |
| 4306   | NM_000901,NM_001166104                                                                                                                                                               | NR3C2    | nuclear receptor subfamily 3 group C member 2              | -4.445017 | 0.00017092  |
| 23285  | NM_015237                                                                                                                                                                            | KIAA1107 | KIAA1107                                                   | -4.502848 | 5.86693E-10 |
| 5624   | NM_000312                                                                                                                                                                            | PROC     | protein C, inactivator of coagulation factors Va and VIIIa | -4.637431 | 0.002094652 |
| 83875  | NM_001037290,NM_001256397,NM_001256398,NM_001256400,NM_031938                                                                                                                        | BCO2     | beta-carotene oxygenase 2                                  | -4.660507 | 0.009911772 |
| 10957  | NM_006813                                                                                                                                                                            | PNRC1    | proline rich nuclear receptor coactivator 1                | -4.690316 | 3.28226E-29 |
| 4602   | NM_001130172,NM_001130173,NM_001161656,NM_001161657,NM_001161658,NM_001161659,NM_001161660,NM_005375,NR_134958,NR_134959,NR_134960,NR_134961,NR_134962,NR_134963,NR_134964,NR_134965 | MYB      | MYB proto-oncogene, transcription factor                   | -4.710209 | 1.42099E-37 |
| 7832   | NM_006763                                                                                                                                                                            | BTG2     | BTG anti-proliferation factor 2                            | -4.711613 | 2.01362E-70 |



|        |                                         |          |                                                    |           |             |
|--------|-----------------------------------------|----------|----------------------------------------------------|-----------|-------------|
| 2199   | NM_001004019,NM_001165035,NM_001998     | FBLN2    | fibulin 2                                          | -4.761109 | 0.004774162 |
| 121268 | NM_001303126,NM_144593,NR_130123        | RHEBL1   | Ras homolog enriched in brain like 1               | -4.782962 | 1.48394E-10 |
| 113791 | NM_001135911,NM_052880                  | PIK3IP1  | phosphoinositide-3-kinase interacting protein 1    | -4.843752 | 0.000123644 |
| 333929 | NM_178310                               | SNAI3    | snail family transcriptional repressor 3           | -4.891289 | 0.000180683 |
| 149428 | NM_001159642,NM_138278                  | BNIPL    | BCL2 interacting protein like                      | -4.900448 | 0.007042335 |
| 9953   | NM_006041,NR_130138                     | HS3ST3B1 | heparan sulfate-glucosamine 3-sulfotransferase 3B1 | -5.141548 | 0.046004343 |
| 286204 | NM_173689,NR_104603                     | CRB2     | crumbs 2, cell polarity complex component          | -5.290100 | 1.55933E-08 |
| 83992  | NM_033427                               | CTTNBP2  | cortactin binding protein 2                        | -5.337789 | 3.14338E-10 |
| 5166   | NM_002612                               | PDK4     | pyruvate dehydrogenase kinase 4                    | -5.364554 | 1.22953E-19 |
| 26959  | NM_001244262,NM_012257                  | HBP1     | HMG-box transcription factor 1                     | -5.770567 | 6.7953E-99  |
| 10023  | NM_005479                               | FRAT1    | FRAT1, WNT signaling pathway regulator             | -5.975201 | 9.2339E-12  |
| 84159  | NM_001244638,NM_032199                  | ARID5B   | AT-rich interaction domain 5B                      | -6.554911 | 5.2763E-128 |
| 729533 | NM_001123168,NM_001317901,NR_134239     | FAM72A   | family with sequence similarity 72 member A        | -6.951512 | 0.01128773  |
| 54800  | NM_001349413,NM_001349414,NM_001349415, | KLHL24   | kelch like family member 24                        | -7.059956 | 4.66445E-10 |

|        |                                                                                                                                                                                                                     |           |                                                |            |             |
|--------|---------------------------------------------------------------------------------------------------------------------------------------------------------------------------------------------------------------------|-----------|------------------------------------------------|------------|-------------|
|        | NM_001349416,NM_001349417,NM_001349418,NM_001349419,NM_001349420,NM_001349421,NM_001349422,NM_001349423,NM_001349424,NM_001349425,NM_001349426,NM_001349427,NM_001349428,NM_001349429,NM_017644,NR_146169,NR_146170 |           |                                                |            |             |
| 2886   | NM_001030002,NM_001242442,NM_001242443,NM_001330207,NM_005310                                                                                                                                                       | GRB7      | growth factor receptor bound protein 7         | -7.513283  | 4.38723E-94 |
| 83478  | NM_001025616,NM_001042669,NM_001287805,NM_001346093,NM_031305                                                                                                                                                       | ARHGAP24  | Rho GTPase activating protein 24               | -8.206625  | 1.72787E-05 |
| 94241  | NM_001135733,NM_033285                                                                                                                                                                                              | TP53INP1  | tumor protein p53 inducible nuclear protein 1  | -8.590492  | 2.91061E-19 |
| 729438 | NM_001145064                                                                                                                                                                                                        | CASTOR2   | cytosolic arginine sensor for mTORC1 subunit 2 | -27.338462 | 1.83591E-13 |
| 388692 | NM_001013644                                                                                                                                                                                                        | LOC388692 | uncharacterized LOC388692                      | -33.954716 | 0.022983273 |

**Table S5** List of differentially expressed genes between CotG-p75-stimulated and wild-type spore-stimulated HT-29 cells

| Gene ID   | Transcript ID                                                      | Gene Symbol | Description                                   | Fold change<br>(G75/WT) | Raw <i>p</i> -val |
|-----------|--------------------------------------------------------------------|-------------|-----------------------------------------------|-------------------------|-------------------|
| 1543      | NM_000499,NM_001319216,NM_001319217                                | CYP1A1      | cytochrome P450 family 1 subfamily A member 1 | 251.652220              | 5.68413E-96       |
| 101060321 | NM_001291462,NM_001291462_dup1,NM_001291462_dup2,NM_001291462_dup3 | TBC1D3G     | TBC1 domain family member 3G                  | 142.323217              | 0.000680907       |
| 904       | NM_001240,NM_001277842                                             | CCNT1       | cyclin T1                                     | 32.757921               | 0.001508658       |
| 121274    | NM_001172681,NM_001172682,NM_152320                                | ZNF641      | zinc finger protein 641                       | 14.578613               | 5.48174E-10       |
| 1545      | NM_000104                                                          | CYP1B1      | cytochrome P450 family 1 subfamily B member 1 | 8.934501                | 0                 |
| 149041    | NM_001300850,NM_001300851,NM_001300852,NM_172071                   | RC3H1       | ring finger and CCCH-type domains 1           | 8.755187                | 0.008819437       |
| 100131234 | NR_040073                                                          | MIR181A1HG  | MIR181A1 host gene                            | 7.759207                | 0.014822303       |
| 220       | NM_000693,NM_001293815                                             | ALDH1A3     | aldehyde dehydrogenase 1 family member A3     | 7.523263                | 5.7102E-308       |
| 6699      | NM_003125                                                          | SPRR1B      | small proline rich protein 1B                 | 6.687715                | 4.32868E-24       |
| 51702     | NM_016233                                                          | PADI3       | peptidyl arginine deiminase 3                 | 6.395291                | 1.83103E-28       |
| 168451    | NM_001130475,NM_001287598,NM_001287599,NM_001287601,NM_182529      | THAP5       | THAP domain containing 5                      | 6.164148                | 0.016686814       |
| 6707      | NM_001097589,NM_005416                                             | SPRR3       | small proline rich protein 3                  | 6.118204                | 6.37206E-27       |

|        |                                                                                                                                          |          |                                                            |          |             |
|--------|------------------------------------------------------------------------------------------------------------------------------------------|----------|------------------------------------------------------------|----------|-------------|
| 114882 | NM_001003712,NM_001319652,NM_001319653,NM_001319655,NM_020841                                                                            | OSBPL8   | oxysterol binding protein like 8                           | 6.107394 | 0.005820532 |
| 6317   | NM_006919                                                                                                                                | SERPINB3 | serpin family B member 3                                   | 6.046358 | 0.00056539  |
| 375791 | NM_199001                                                                                                                                | CYSRT1   | cysteine rich tail 1                                       | 5.802612 | 1.36895E-24 |
| 346389 | NM_182762                                                                                                                                | MACC1    | MACC1, MET transcriptional regulator                       | 5.756295 | 0.004581468 |
| 8120   | NM_001278511,NM_001278512,NM_001348440,NM_001348441,NM_004644                                                                            | AP3B2    | adaptor related protein complex 3 beta 2 subunit           | 5.748581 | 6.12125E-06 |
| 6398   | NM_003004                                                                                                                                | SECTM1   | secreted and transmembrane 1                               | 5.435386 | 2.84165E-13 |
| 29114  | NM_001008272,NM_001008273,NM_013259                                                                                                      | TAGLN3   | transgelin 3                                               | 5.369125 | 5.66741E-12 |
| 164312 | NM_152611                                                                                                                                | LRRN4    | leucine rich repeat neuronal 4                             | 5.212794 | 9.66806E-20 |
| 84239  | NM_032279                                                                                                                                | ATP13A4  | ATPase 13A4                                                | 4.940219 | 0.001652684 |
| 2736   | NM_005270                                                                                                                                | GLI2     | GLI family zinc finger 2                                   | 4.877476 | 1.96835E-14 |
| 79094  | NM_001142776,NM_024111                                                                                                                   | CHAC1    | ChaC glutathione specific gamma-glutamylcyclotransferase 1 | 4.743025 | 3.64426E-16 |
| 347365 | NM_198510                                                                                                                                | ITIH6    | inter-alpha-trypsin inhibitor heavy chain family member 6  | 4.706921 | 0.007476815 |
| 1588   | NM_000103,NM_001347248,NM_001347249,NM_001347250,NM_001347251,NM_001347252,NM_001347253,NM_001347254,NM_001347255,NM_001347256,NM_031226 | CYP19A1  | cytochrome P450 family 19 subfamily A member 1             | 4.514089 | 0.004948059 |
| 10170  | NM_001142270,NM_001                                                                                                                      | DHRS9    | dehydrogenase/reductase 9                                  | 4.503366 | 1.77855E-41 |

|           |                                                                                                                                                  |          |                                         |          |             |
|-----------|--------------------------------------------------------------------------------------------------------------------------------------------------|----------|-----------------------------------------|----------|-------------|
|           | 142271,NM_001289763,<br>NM_199204                                                                                                                |          |                                         |          |             |
| 2702      | NM_005266,NM_181703                                                                                                                              | GJA5     | gap junction protein alpha 5            | 4.455071 | 6.15392E-28 |
| 7133      | NM_001066                                                                                                                                        | TNFRSF1B | TNF receptor superfamily member 1B      | 4.341483 | 2.24005E-10 |
| 85409     | NM_001271082,NM_033<br>120                                                                                                                       | NKD2     | naked cuticle homolog 2                 | 3.944249 | 8.07598E-46 |
| 5582      | NM_001316329,NM_002<br>739                                                                                                                       | PRKCG    | protein kinase C gamma                  | 3.864862 | 5.77407E-15 |
| 84290     | NM_032330                                                                                                                                        | CAPNS2   | calpain small subunit 2                 | 3.663600 | 0.000254949 |
| 8771      | NM_003823                                                                                                                                        | TNFRSF6B | TNF receptor superfamily member 6b      | 3.662200 | 5.36865E-05 |
| 221472    | NM_173558                                                                                                                                        | FGD2     | FYVE, RhoGEF and PH domain containing 2 | 3.623011 | 0.003796263 |
| 6536      | NM_001024845,NM_001<br>261380,NM_001328626,<br>NM_001328627,NM_001<br>328628,NM_001328629,<br>NM_001328630,NM_006<br>934,NM_201649,NR_048<br>548 | SLC6A9   | solute carrier family 6 member 9        | 3.612395 | 1.93522E-05 |
| 3038      | NM_001199280,NM_005<br>329,NM_138612                                                                                                             | HAS3     | hyaluronan synthase 3                   | 3.601491 | 1.43771E-09 |
| 254439    | NM_001136485                                                                                                                                     | C11orf86 | chromosome 11 open reading frame 86     | 3.560029 | 4.18317E-06 |
| 10896     | NM_022375                                                                                                                                        | OCLM     | oculomedin                              | 3.449083 | 0.01149653  |
| 255324    | NM_001270989,NM_001<br>270990,NM_001270991,<br>NM_001270992,NM_001<br>270993,NR_073114,NR_<br>073117                                             | EPGN     | epithelial mitogen                      | 3.417381 | 0.028726372 |
| 100131378 | NM_001166692                                                                                                                                     | C11orf91 | chromosome 11 open reading frame 91     | 3.401440 | 0.000263494 |

|        |                                                               |            |                                               |          |             |
|--------|---------------------------------------------------------------|------------|-----------------------------------------------|----------|-------------|
| 8482   | NM_001146029,NM_001146030,NM_003612                           | SEMA7A     | semaphorin 7A (John Milton Hagen blood group) | 3.381057 | 5.68696E-06 |
| 54541  | NM_019058                                                     | DDIT4      | DNA damage inducible transcript 4             | 3.352270 | 2.92733E-81 |
| 285268 | NM_001098414,NM_001287245,NM_198484                           | ZNF621     | zinc finger protein 621                       | 3.332213 | 0.018896531 |
| 7433   | NM_001251882,NM_001251883,NM_001251884,NM_001251885,NM_004624 | VIPR1      | vasoactive intestinal peptide receptor 1      | 3.301784 | 3.25269E-79 |
| 1291   | NM_001848                                                     | COL6A1     | collagen type VI alpha 1 chain                | 3.236719 | 0.004570486 |
| 3009   | NM_005322                                                     | HIST1H1B   | histone cluster 1 H1 family member b          | 3.192682 | 0.024532126 |
| 7307   | NM_001025203,NM_001025204,NM_006758                           | U2AF1      | U2 small nuclear RNA auxiliary factor 1       | 3.150412 | 0.018229073 |
| 1026   | NM_000389,NM_001220777,NM_001220778,NM_001291549,NM_078467    | CDKN1A     | cyclin dependent kinase inhibitor 1A          | 3.117541 | 1.36729E-90 |
| 356    | NM_000639,NM_001302746                                        | FASLG      | Fas ligand                                    | 3.109825 | 0.014009789 |
| 285154 | NR_027252                                                     | CYP1B1-AS1 | CYP1B1 antisense RNA 1                        | 3.109478 | 2.68426E-08 |
| 4856   | NM_002514                                                     | NOV        | nephroblastoma overexpressed                  | 3.087774 | 0.006320913 |
| 9788   | NM_001282971,NM_001282974,NM_014751                           | MTSS1      | MTSS1, I-BAR domain containing                | 3.067953 | 2.73134E-24 |
| 79718  | NM_001321193,NM_001321194,NM_001321195,NM_024665              | TBL1XR1    | transducin beta like 1 X-linked receptor 1    | 3.047832 | 0.018662363 |
| 400221 | NR_039985                                                     | FLJ22447   | uncharacterized LOC400221                     | 3.046488 | 0.012697101 |
| 2840   | NM_001161415,NM_001161416,NM_001161417,                       | GPR17      | G protein-coupled receptor 17                 | 3.027350 | 2.04266E-05 |

|           |                                                  |           |                                                    |          |             |
|-----------|--------------------------------------------------|-----------|----------------------------------------------------|----------|-------------|
|           | NM_005291                                        |           |                                                    |          |             |
| 55084     | NM_018013                                        | SOBP      | sine oculis binding protein homolog                | 2.886317 | 0.00767208  |
| 3352      | NM_000864                                        | HTR1D     | 5-hydroxytryptamine receptor 1D                    | 2.880084 | 9.63148E-39 |
| 3575      | NM_002185,NR_120485                              | IL7R      | interleukin 7 receptor                             | 2.825362 | 0.017604775 |
| 57214     | NM_001293298,NM_001293304,NM_018689              | CEMIP     | cell migration inducing hyaluronan binding protein | 2.824266 | 3.04199E-51 |
| 250       | NM_001632                                        | ALPP      | alkaline phosphatase, placental                    | 2.810857 | 0.002970607 |
| 85495     | NR_002312                                        | RPPH1     | ribonuclease P RNA component H1                    | 2.788936 | 0.001490797 |
| 5743      | NM_000963                                        | PTGS2     | prostaglandin-endoperoxide synthase 2              | 2.769494 | 4.93081E-55 |
| 100499467 | NR_036488,NR_137280,NR_137281                    | LINC00673 | long intergenic non-protein coding RNA 673         | 2.758183 | 1.43804E-49 |
| 3872      | NM_000422                                        | KRT17     | keratin 17                                         | 2.741327 | 1.18658E-42 |
| 9839      | NM_001171653,NM_014795,NR_033258                 | ZEB2      | zinc finger E-box binding homeobox 2               | 2.709612 | 0.023755334 |
| 8862      | NM_017413                                        | APLN      | apelin                                             | 2.709293 | 0.030804032 |
| 400619    | NR_033876                                        | LINC00511 | long intergenic non-protein coding RNA 511         | 2.686109 | 1.85669E-07 |
| 9518      | NM_004864                                        | GDF15     | growth differentiation factor 15                   | 2.677628 | 5.47262E-45 |
| 117157    | NM_053282                                        | SH2D1B    | SH2 domain containing 1B                           | 2.674360 | 0.032607663 |
| 6698      | NM_001199828,NM_005987                           | SPRR1A    | small proline rich protein 1A                      | 2.629925 | 0.012450711 |
| 219855    | NM_001145290,NM_198277                           | SLC37A2   | solute carrier family 37 member 2                  | 2.628228 | 1.86397E-10 |
| 8193      | NM_001135155,NM_001135156,NM_001289978,NM_004647 | DPF1      | double PHD fingers 1                               | 2.599998 | 0.000949037 |
| 9536      | NM_004878                                        | PTGES     | prostaglandin E synthase                           | 2.569392 | 1.3564E-08  |

|           |                                                                            |           |                                                                             |          |             |
|-----------|----------------------------------------------------------------------------|-----------|-----------------------------------------------------------------------------|----------|-------------|
| 105374177 | NR_135546                                                                  | LINC02029 | long intergenic non-protein coding RNA 2029                                 | 2.566250 | 2.37434E-06 |
| 3008      | NM_005321                                                                  | HIST1H1E  | histone cluster 1 H1 family member e                                        | 2.565770 | 0.01874117  |
| 245973    | NM_001039362,NM_144583                                                     | ATP6V1C2  | ATPase H <sup>+</sup> transporting V1 subunit C2                            | 2.542487 | 3.65581E-05 |
| 78990     | NM_023112                                                                  | OTUB2     | OTU deubiquitinase, ubiquitin aldehyde binding 2                            | 2.535288 | 7.51788E-16 |
| 2069      | NM_001432                                                                  | EREG      | epiregulin                                                                  | 2.534662 | 7.90063E-78 |
| 84623     | NM_001161707,NM_001301097,NM_032531                                        | KIRREL3   | kin of IRRE like 3 (Drosophila)                                             | 2.504548 | 0.000857494 |
| 23328     | NM_001346505,NM_001346506,NM_001346507,NM_001346508,NM_001346509,NM_015278 | SASH1     | SAM and SH3 domain containing 1                                             | 2.498133 | 4.04766E-25 |
| 266977    | NM_025048,NM_153840                                                        | ADGRF1    | adhesion G protein-coupled receptor F1                                      | 2.465793 | 1.35153E-62 |
| 101929125 | NR_109859                                                                  | LINC01730 | long intergenic non-protein coding RNA 1730                                 | 2.461604 | 0.037708918 |
| 3283      | NM_000862,NM_001328615                                                     | HSD3B1    | hydroxy-delta-5-steroid dehydrogenase, 3 beta-and steroid delta-isomerase 1 | 2.456860 | 6.16907E-19 |
| 25758     | NM_012194                                                                  | KIAA1549L | KIAA1549 like                                                               | 2.439854 | 0.031338418 |
| 93429     | NR_027003                                                                  | LOC93429  | uncharacterized LOC93429                                                    | 2.433951 | 0.000369655 |
| 84803     | NM_001256421,NM_001256422,NM_032717                                        | GPAT3     | glycerol-3-phosphate acyltransferase 3                                      | 2.433066 | 1.09083E-44 |
| 54206     | NM_018948                                                                  | ERRFI1    | ERBB receptor feedback inhibitor 1                                          | 2.425053 | 3.21918E-70 |
| 374       | NM_001657,NM_001657_dup1                                                   | AREG      | amphiregulin                                                                | 2.422047 | 1.79058E-63 |
| 25907     | NM_015444                                                                  | TMEM158   | transmembrane protein 158 (gene/pseudogene)                                 | 2.388364 | 1.99138E-11 |
| 5054      | NM_000602                                                                  | SERPINE1  | serpin family E member 1                                                    | 2.384717 | 3.57682E-08 |
| 8061      | NM_001300844,NM_001                                                        | FOSL1     | FOS like 1, AP-1 transcription factor subunit                               | 2.359547 | 1.59604E-36 |



|           |                                                                                                                                                                                      |                  |                                                         |          |             |
|-----------|--------------------------------------------------------------------------------------------------------------------------------------------------------------------------------------|------------------|---------------------------------------------------------|----------|-------------|
|           | 300855,NM_001300856,<br>NM_001300857,NM_005<br>438,NR_125339                                                                                                                         |                  |                                                         |          |             |
| 100529207 | NR_037714                                                                                                                                                                            | RAD51L3-<br>RFFL | RAD51L3-RFFL readthrough                                | 2.353991 | 1.91162E-14 |
| 101241892 | NR_103844                                                                                                                                                                            | NPTN-IT1         | NPTN intronic transcript 1                              | 2.348173 | 0.002501013 |
| 6004      | NM_002928                                                                                                                                                                            | RGS16            | regulator of G protein signaling 16                     | 2.343767 | 1.08309E-09 |
| 1958      | NM_001964                                                                                                                                                                            | EGR1             | early growth response 1                                 | 2.339189 | 0.000284156 |
| 91663     | NM_001020818,NM_001<br>020819,NM_001020820,<br>NM_001020821,NM_001<br>290188,NM_001290189,<br>NM_001290190,NM_001<br>290191,NM_001290192,<br>NM_001290193,NM_001<br>290194,NM_138373 | MYADM            | myeloid associated differentiation marker               | 2.337193 | 1.46948E-45 |
| 6484      | NM_001254757,NM_001<br>254758,NM_001254759,<br>NM_001348396,NM_001<br>348397,NM_001348398,<br>NM_001348399,NM_001<br>348400,NM_006278,NR_<br>145671                                  | ST3GAL4          | ST3 beta-galactoside alpha-2,3-sialyltransferase<br>4   | 2.333121 | 4.21025E-88 |
| 64856     | NM_022834,NM_199121                                                                                                                                                                  | VWA1             | von Willebrand factor A domain containing 1             | 2.325877 | 0.005795822 |
| 2669      | NM_005261,NM_181702                                                                                                                                                                  | GEM              | GTP binding protein overexpressed in skeletal<br>muscle | 2.322999 | 0.003322849 |
| 10397     | NM_001135242,NM_001<br>258432,NM_001258433,<br>NM_006096                                                                                                                             | NDRG1            | N-myc downstream regulated 1                            | 2.316012 | 8.19325E-18 |
| 7163      | NM_001025252,NM_001                                                                                                                                                                  | TPD52            | tumor protein D52                                       | 2.311504 | 0.017259717 |

|           |                                                                                                                                            |          |                                                                                     |          |             |
|-----------|--------------------------------------------------------------------------------------------------------------------------------------------|----------|-------------------------------------------------------------------------------------|----------|-------------|
|           | 025253,NM_001287140,<br>NM_001287142,NM_001<br>287143,NM_001287144,<br>NM_005079,NR_105033,<br>NR_105034,NR_105035,<br>NR_105036,NR_105037 |          |                                                                                     |          |             |
| 164832    | NM_198461                                                                                                                                  | LONRF2   | LON peptidase N-terminal domain and ring<br>finger 2                                | 2.305796 | 1.36108E-06 |
| 3708      | NM_001099952,NM_001<br>168272,NM_002222                                                                                                    | ITPR1    | inositol 1,4,5-trisphosphate receptor type 1                                        | 2.301864 | 6.88832E-05 |
| 29126     | NM_001267706,NM_001<br>314029,NM_014143,NR_<br>052005                                                                                      | CD274    | CD274 molecule                                                                      | 2.301860 | 5.30667E-15 |
| 9965      | NM_005117                                                                                                                                  | FGF19    | fibroblast growth factor 19                                                         | 2.291692 | 1.08496E-52 |
| 1839      | NM_001945                                                                                                                                  | HBEGF    | heparin binding EGF like growth factor                                              | 2.276884 | 6.87643E-07 |
| 11240     | NM_007365                                                                                                                                  | PADI2    | peptidyl arginine deiminase 2                                                       | 2.271231 | 1.17788E-15 |
| 112574    | NM_001102575,NM_001<br>145427,NM_052870                                                                                                    | SNX18    | sorting nexin 18                                                                    | 2.262652 | 4.09351E-41 |
| 100820829 | NM_001018100,NM_152<br>451                                                                                                                 | MYZAP    | myocardial zonula adherens protein                                                  | 2.260287 | 1.03033E-40 |
| 100271836 | NR_027155                                                                                                                                  | SMG1P3   | SMG1P3, nonsense mediated mRNA decay<br>associated PI3K related kinase pseudogene 3 | 2.241815 | 0.010224267 |
| 8351      | NM_003530                                                                                                                                  | HIST1H3D | histone cluster 1 H3 family member d                                                | 2.226521 | 0.023351291 |
| 49854     | NM_001098402,NM_001<br>098403,NM_001320729,<br>NM_001320731,NM_020<br>727                                                                  | ZBTB21   | zinc finger and BTB domain containing 21                                            | 2.222759 | 0.002308992 |
| 7425      | NM_003378                                                                                                                                  | VGF      | VGF nerve growth factor inducible                                                   | 2.218771 | 0.001915295 |
| 5366      | NM_021127                                                                                                                                  | PMAIP1   | phorbol-12-myristate-13-acetate-induced protein                                     | 2.207396 | 6.60661E-13 |

|           |                                                                                               |             |                                        |          |             |
|-----------|-----------------------------------------------------------------------------------------------|-------------|----------------------------------------|----------|-------------|
|           |                                                                                               |             | 1                                      |          |             |
| 168455    | NM_175884                                                                                     | CCDC71L     | coiled-coil domain containing 71 like  | 2.200319 | 1.19826E-28 |
| 6781      | NM_003155                                                                                     | STC1        | stanniocalcin 1                        | 2.191549 | 0.001585076 |
| 677792    | NR_003026                                                                                     | SNORA1      | small nucleolar RNA, H/ACA box 1       | 2.191086 | 0.006180666 |
| 5420      | NM_001018111,NM_005397                                                                        | PODXL       | podocalyxin like                       | 2.176138 | 0.010339434 |
| 2331      | NM_002023,NR_103757                                                                           | FMOD        | fibromodulin                           | 2.173312 | 0.026720261 |
| 4313      | NM_001127891,NM_001302508,NM_001302509,NM_001302510,NM_004530                                 | MMP2        | matrix metalloproteinase 2             | 2.164409 | 0.015385435 |
| 8572      | NM_001131027,NM_003687                                                                        | PDLIM4      | PDZ and LIM domain 4                   | 2.161603 | 0.014193164 |
| 1959      | NM_000399,NM_001136177,NM_001136178,NM_001136179,NM_001321037                                 | EGR2        | early growth response 2                | 2.147234 | 0.010228801 |
| 145781    | NM_001018090,NM_001018091,NM_001285900, NR_104367, NR_104368, NR_104369, NR_104370, NR_104371 | GCOM1       | GRINL1A complex locus 1                | 2.146996 | 0.044976356 |
| 7128      | NM_001270507,NM_001270508,NM_006290                                                           | TNFAIP3     | TNF alpha induced protein 3            | 2.137841 | 2.92645E-06 |
| 254427    | NM_153256                                                                                     | PROSER2     | proline and serine rich 2              | 2.120174 | 9.32208E-43 |
| 10123     | NM_001282431,NM_005737                                                                        | ARL4C       | ADP ribosylation factor like GTPase 4C | 2.110321 | 1.1124E-30  |
| 100127888 | NR_024470                                                                                     | SLCO4A1-AS1 | SLCO4A1 antisense RNA 1                | 2.109623 | 3.20155E-09 |

|        |                                                                                         |           |                                                               |          |             |
|--------|-----------------------------------------------------------------------------------------|-----------|---------------------------------------------------------------|----------|-------------|
| 285848 | NM_001145716,NM_001145717,NM_173676                                                     | PNPLA1    | patatin like phospholipase domain containing 1                | 2.109227 | 0.001987264 |
| 619567 | NR_002587                                                                               | SNORD2    | small nucleolar RNA, C/D box 2                                | 2.099448 | 0.028512101 |
| 1437   | NM_000758                                                                               | CSF2      | colony stimulating factor 2                                   | 2.094039 | 0.000180958 |
| 339894 | NR_034007                                                                               | LINC00880 | long intergenic non-protein coding RNA 880                    | 2.090512 | 0.000313462 |
| 6581   | NM_021977                                                                               | SLC22A3   | solute carrier family 22 member 3                             | 2.090052 | 6.0234E-08  |
| 7151   | NR_002719                                                                               | TOP1P1    | topoisomerase (DNA) I pseudogene 1                            | 2.089298 | 0.032720728 |
| 6513   | NM_006516                                                                               | SLC2A1    | solute carrier family 2 member 1                              | 2.085711 | 1.73693E-56 |
| 360    | NM_001318144,NM_004925                                                                  | AQP3      | aquaporin 3 (Gill blood group)                                | 2.078793 | 4.95187E-29 |
| 27063  | NM_014391                                                                               | ANKRD1    | ankyrin repeat domain 1                                       | 2.078411 | 0.001651042 |
| 83667  | NM_031459                                                                               | SESN2     | sestrin 2                                                     | 2.078149 | 6.04423E-27 |
| 5163   | NM_001278549,NM_002610,NR_103729,NR_103731                                              | PDK1      | pyruvate dehydrogenase kinase 1                               | 2.073394 | 0.042826941 |
| 137994 | NM_001199659,NM_001199660,NM_001286787,NM_001286819,NM_001286821,NM_001330515,NM_144652 | LETM2     | leucine zipper and EF-hand containing transmembrane protein 2 | 2.065416 | 2.4226E-09  |
| 23657  | NM_014331                                                                               | SLC7A11   | solute carrier family 7 member 11                             | 2.058163 | 8.76275E-39 |
| 59285  | NM_031897,NM_145814,NM_145815,NR_102308                                                 | CACNG6    | calcium voltage-gated channel auxiliary subunit gamma 6       | 2.057113 | 2.07579E-07 |
| 9940   | NM_001321153,NM_007335,NM_007337                                                        | DLEC1     | deleted in lung and esophageal cancer 1                       | 2.056522 | 0.003405503 |
| 4586   | NM_001304359                                                                            | MUC5AC    | mucin 5AC, oligomeric mucus/gel-forming                       | 2.054319 | 1.20413E-06 |
| 7477   | NM_058238                                                                               | WNT7B     | Wnt family member 7B                                          | 2.046873 | 1.10086E-32 |

|        |                                                                                                                                                                                                 |           |                                                   |           |             |
|--------|-------------------------------------------------------------------------------------------------------------------------------------------------------------------------------------------------|-----------|---------------------------------------------------|-----------|-------------|
| 22822  | NM_007350                                                                                                                                                                                       | PHLDA1    | pleckstrin homology like domain family A member 1 | 2.042188  | 4.72694E-62 |
| 80153  | NM_001142443,NM_001142444,NM_001351378,NM_001351379,NM_025083                                                                                                                                   | EDC3      | enhancer of mRNA decapping 3                      | 2.030632  | 5.26669E-51 |
| 63979  | NM_001042762,NM_001287492,NM_001287493,NM_001287494,NM_001287495,NM_001287496,NM_001346558,NM_001346559,NM_001346560,NM_001346561,NM_001346562,NM_001346563,NM_001346564,NM_001346565,NM_022116 | FIGNL1    | fidgetin like 1                                   | 2.021638  | 0.003932982 |
| 2633   | NM_002053                                                                                                                                                                                       | GBP1      | guanylate binding protein 1                       | 2.021594  | 0.001490207 |
| 9590   | NM_005100,NM_144497                                                                                                                                                                             | AKAP12    | A-kinase anchoring protein 12                     | 2.021564  | 3.62708E-26 |
| 1045   | NM_001265                                                                                                                                                                                       | CDX2      | caudal type homeobox 2                            | 2.021214  | 2.72068E-05 |
| 6274   | NM_002960                                                                                                                                                                                       | S100A3    | S100 calcium binding protein A3                   | 2.017240  | 0.000168012 |
| 29950  | NM_013376                                                                                                                                                                                       | SERTAD1   | SERTA domain containing 1                         | 2.011789  | 2.69252E-33 |
| 57491  | NM_001242412,NM_020731                                                                                                                                                                          | AHRR      | aryl-hydrocarbon receptor repressor               | 2.011649  | 8.71824E-09 |
| 8140   | NM_003486                                                                                                                                                                                       | SLC7A5    | solute carrier family 7 member 5                  | 2.000856  | 5.82735E-53 |
| 641649 | NM_001042595,NM_001098821,NM_001098822,NM_001098823,NM_001098824,NM_001098825                                                                                                                   | TMEM91    | transmembrane protein 91                          | -2.000339 | 0.001119804 |
| 283487 | NR_027701                                                                                                                                                                                       | LINC00346 | long intergenic non-protein coding RNA 346        | -2.000835 | 1.51003E-14 |

|           |                                                                                                                                          |           |                                                         |           |             |
|-----------|------------------------------------------------------------------------------------------------------------------------------------------|-----------|---------------------------------------------------------|-----------|-------------|
| 2738      | NM_138465                                                                                                                                | GLI4      | GLI family zinc finger 4                                | -2.004452 | 2.34992E-05 |
| 100506810 | NR_038856                                                                                                                                | LINC01132 | long intergenic non-protein coding RNA 1132             | -2.006112 | 0.007105163 |
| 728658    | NR_026712                                                                                                                                | RPL13AP5  | ribosomal protein L13a pseudogene 5                     | -2.010750 | 0.002730684 |
| 23177     | NM_001319100,NM_001319101,NM_015147,NR_134966                                                                                            | CEP68     | centrosomal protein 68                                  | -2.011913 | 8.38263E-09 |
| 55809     | NM_001297573,NM_033502                                                                                                                   | TRERF1    | transcriptional regulating factor 1                     | -2.012895 | 1.63599E-18 |
| 283       | NM_001097577,NM_001145                                                                                                                   | ANG       | angiogenin                                              | -2.015502 | 0.022409084 |
| 375287    | NM_198557                                                                                                                                | RBM43     | RNA binding motif protein 43                            | -2.021572 | 0.000161918 |
| 147912    | NM_175875                                                                                                                                | SIX5      | SIX homeobox 5                                          | -2.021773 | 1.06162E-10 |
| 619279    | NM_001033723                                                                                                                             | ZNF704    | zinc finger protein 704                                 | -2.023544 | 1.16234E-11 |
| 133746    | NM_152405                                                                                                                                | JMY       | junction mediating and regulatory protein, p53 cofactor | -2.025527 | 1.07079E-14 |
| 400986    | NM_001310154                                                                                                                             | ANKRD36C  | ankyrin repeat domain 36C                               | -2.025909 | 1.33964E-06 |
| 4212      | NM_001220482,NM_002399,NM_170674,NM_170675,NM_170676,NM_170677,NM_172315,NM_172316,NR_051953                                             | MEIS2     | Meis homeobox 2                                         | -2.034676 | 5.56109E-21 |
| 1942      | NM_004428,NM_182685                                                                                                                      | EFNA1     | ephrin A1                                               | -2.036785 | 6.37623E-11 |
| 9514      | NM_001318103,NM_001318104,NM_001318105,NM_001318106,NM_001318107,NM_001318108,NM_001318109,NM_001318110,NM_001318111,NM_001318112,NM_001 | GAL3ST1   | galactose-3-O-sulfotransferase 1                        | -2.036832 | 0.001169572 |

|           |                                                                                                                                                                                                                                                                                               |              |                                                        |           |             |
|-----------|-----------------------------------------------------------------------------------------------------------------------------------------------------------------------------------------------------------------------------------------------------------------------------------------------|--------------|--------------------------------------------------------|-----------|-------------|
|           | 318113,NM_001318114,<br>NM_001318115,NM_001<br>318116,NM_004861                                                                                                                                                                                                                               |              |                                                        |           |             |
| 3707      | NM_002221                                                                                                                                                                                                                                                                                     | ITPKB        | inositol-trisphosphate 3-kinase B                      | -2.039767 | 1.07076E-14 |
| 100287896 | NM_001319240                                                                                                                                                                                                                                                                                  | LOC100287896 | uncharacterized LOC100287896                           | -2.041738 | 7.79124E-09 |
|           | NM_001012505,NM_001<br>244808,NM_001244810,<br>NM_001244812,NM_001<br>244813,NM_001244814,<br>NM_001244815,NM_001<br>244816,NM_001349337,<br>NM_001349338,NM_001<br>349339,NM_001349340,<br>NM_001349341,NM_001<br>349342,NM_001349343,<br>NM_001349344,NM_032<br>682,NR_146142,NR_146<br>143 | FOXP1        | forkhead box P1                                        | -2.042796 | 4.42326E-19 |
| 23002     | NM_001270520,NM_014<br>992                                                                                                                                                                                                                                                                    | DAAM1        | dishevelled associated activator of<br>morphogenesis 1 | -2.045423 | 1.40515E-18 |
| 285313    | NM_001178145,NM_001<br>178146,NM_178822                                                                                                                                                                                                                                                       | IGSF10       | immunoglobulin superfamily member 10                   | -2.046808 | 0.003918783 |
| 100271722 | NR_027036                                                                                                                                                                                                                                                                                     | LINC00899    | long intergenic non-protein coding RNA 899             | -2.050820 | 0.003161769 |
| 57568     | NM_020808                                                                                                                                                                                                                                                                                     | SIPA1L2      | signal induced proliferation associated 1 like 2       | -2.051439 | 1.37313E-10 |
| 3201      | NM_002141                                                                                                                                                                                                                                                                                     | HOXA4        | homeobox A4                                            | -2.060516 | 6.04085E-08 |
| 84952     | NM_001252335,NM_032<br>866                                                                                                                                                                                                                                                                    | CGNL1        | cingulin like 1                                        | -2.067470 | 9.25385E-06 |
| 4661      | NM_004535                                                                                                                                                                                                                                                                                     | MYT1         | myelin transcription factor 1                          | -2.069241 | 7.43354E-06 |
| 57476     | NM_001286563,NM_001<br>286564,NM_001330396,                                                                                                                                                                                                                                                   | GRAMD1B      | GRAM domain containing 1B                              | -2.072899 | 3.05155E-33 |

|           |                                                                         |              |                                                            |           |             |
|-----------|-------------------------------------------------------------------------|--------------|------------------------------------------------------------|-----------|-------------|
|           | NM_020716                                                               |              |                                                            |           |             |
| 6745      | NM_001292008,NM_003144,NR_120448                                        | SSR1         | signal sequence receptor subunit 1                         | -2.073854 | 0.020042573 |
| 143666    | NR_026967                                                               | LOC143666    | uncharacterized LOC143666                                  | -2.084615 | 2.47917E-05 |
| 100130581 | NR_027412,NR_027413                                                     | LINC00910    | long intergenic non-protein coding RNA 910                 | -2.091788 | 2.96929E-05 |
| 27244     | NM_001199933,NM_001199934,NM_014454                                     | SESN1        | sestrin 1                                                  | -2.092593 | 1.63056E-19 |
| 65986     | NM_001105539,NM_001277145,NM_023929                                     | ZBTB10       | zinc finger and BTB domain containing 10                   | -2.092991 | 0.000120953 |
| 149076    | NM_152493                                                               | ZNF362       | zinc finger protein 362                                    | -2.095283 | 0.012822191 |
| 140766    | NM_080722,NM_139155                                                     | ADAMTS14     | ADAM metalloproteinase with thrombospondin type 1 motif 14 | -2.096145 | 0.042210059 |
| 126375    | NM_175872                                                               | ZNF792       | zinc finger protein 792                                    | -2.100750 | 7.55419E-13 |
| 102725126 | NR_136306                                                               | LOC102725126 | FSHD region gene 1 pseudogene                              | -2.109121 | 0.039562565 |
| 400604    | NR_038458                                                               | TOB1-AS1     | TOB1 antisense RNA 1                                       | -2.110490 | 0.019745398 |
| 6662      | NM_000346                                                               | SOX9         | SRY-box 9                                                  | -2.114768 | 2.91489E-35 |
| 10902     | NM_001164326,NM_001300961,NM_001300962,NM_001300966,NM_006696,NM_139199 | BRD8         | bromodomain containing 8                                   | -2.115750 | 3.92904E-47 |
| 55281     | NM_018295                                                               | TMEM140      | transmembrane protein 140                                  | -2.118455 | 0.000141496 |
| 9501      | NM_001190411,NM_001190412,NM_001190413,NM_006987                        | RPH3AL       | rabphilin 3A like (without C2 domains)                     | -2.120876 | 0.028309383 |
| 55701     | NM_001278529,NM_001278530,NM_018071                                     | ARHGEF40     | Rho guanine nucleotide exchange factor 40                  | -2.125223 | 7.67973E-10 |
| 138199    | NM_001320497,NM_152                                                     | CARNMT1      | carnosine N-methyltransferase 1                            | -2.126288 | 0.014904857 |



|           |                                                                                                                                                                |             |                                                       |           |             |
|-----------|----------------------------------------------------------------------------------------------------------------------------------------------------------------|-------------|-------------------------------------------------------|-----------|-------------|
|           | 420,NR_135282                                                                                                                                                  |             |                                                       |           |             |
| 64599     | NM_022574                                                                                                                                                      | GIGYF1      | GRB10 interacting GYF protein 1                       | -2.128060 | 2.40231E-49 |
| 402415    | NM_212559                                                                                                                                                      | XKRX        | XK related, X-linked                                  | -2.128247 | 1.70275E-06 |
| 1944      | NM_004952                                                                                                                                                      | EFNA3       | ephrin A3                                             | -2.135306 | 0.000281691 |
| 8654      | NM_001083,NM_033430<br>,NM_033437                                                                                                                              | PDE5A       | phosphodiesterase 5A                                  | -2.135979 | 0.000130245 |
| 26140     | NM_001025930,NR_037<br>162                                                                                                                                     | TTLL3       | tubulin tyrosine ligase like 3                        | -2.136430 | 0.000317746 |
| 3221      | NM_014620,NM_153633                                                                                                                                            | HOXC4       | homeobox C4                                           | -2.137568 | 1.08367E-05 |
| 283991    | NM_182565                                                                                                                                                      | UBALD2      | UBA like domain containing 2                          | -2.141023 | 1.93077E-29 |
| 135932    | NM_001242773,NM_001<br>242774,NM_001242775,<br>NM_001282876,NM_001<br>282877,NM_153345,NR_<br>040003,NR_104250,NR_<br>104251,NR_104252,NR_<br>104253,NR_104254 | TMEM139     | transmembrane protein 139                             | -2.144604 | 6.33772E-42 |
| 23248     | NM_001297673,NM_001<br>297674,NM_015203                                                                                                                        | RPRD2       | regulation of nuclear pre-mRNA domain<br>containing 2 | -2.145428 | 0.021964959 |
| 5444      | NM_000446                                                                                                                                                      | PON1        | paraoxonase 1                                         | -2.146405 | 0.027206597 |
| 101928079 | NR_104131                                                                                                                                                      | SLC44A3-AS1 | SLC44A3 antisense RNA 1                               | -2.147474 | 0.045641487 |
| 4215      | NM_001330431,NM_002<br>401,NM_203351                                                                                                                           | MAP3K3      | mitogen-activated protein kinase kinase kinase 3      | -2.149370 | 3.62239E-28 |
| 11074     | NM_007028,NR_134870,<br>NR_134871                                                                                                                              | TRIM31      | tripartite motif containing 31                        | -2.149389 | 8.83604E-56 |
| 118738    | NM_001346932,NM_001<br>346933,NM_001346934,<br>NM_001346935,NM_001                                                                                             | ZNF488      | zinc finger protein 488                               | -2.152253 | 9.47493E-18 |

|           |                                                                                                   |           |                                                   |           |             |
|-----------|---------------------------------------------------------------------------------------------------|-----------|---------------------------------------------------|-----------|-------------|
|           | 346936,NM_153034                                                                                  |           |                                                   |           |             |
| 79960     | NM_001287437,NM_001287439,NM_001287440,NM_001287441,NM_001287442,NM_001287443,NM_024900,NM_199320 | JADE1     | jade family PHD finger 1                          | -2.156453 | 7.91739E-20 |
| 286336    | NM_033387                                                                                         | FAM78A    | family with sequence similarity 78 member A       | -2.156977 | 0.005752239 |
| 256691    | NM_001347990,NM_153267,NR_125850                                                                  | MAMDC2    | MAM domain containing 2                           | -2.157780 | 0.006761224 |
| 105374105 | NR_146710                                                                                         | LINC02014 | long intergenic non-protein coding RNA 2014       | -2.159366 | 0.041177908 |
| 8431      | NM_021969                                                                                         | NR0B2     | nuclear receptor subfamily 0 group B member 2     | -2.160623 | 0.001986097 |
| 143879    | NM_001330359,NM_152433,NM_198439                                                                  | KBTBD3    | kelch repeat and BTB domain containing 3          | -2.160680 | 1.73812E-08 |
| 126272    | NM_152361                                                                                         | EID2B     | EP300 interacting inhibitor of differentiation 2B | -2.164072 | 0.000138876 |
| 283460    | NR_024345                                                                                         | HNF1A-AS1 | HNF1A antisense RNA 1                             | -2.170476 | 6.39426E-05 |
| 79818     | NM_024762                                                                                         | ZNF552    | zinc finger protein 552                           | -2.172415 | 3.01563E-34 |
| 54567     | NM_019074                                                                                         | DLL4      | delta like canonical Notch ligand 4               | -2.181370 | 0.008477062 |
| 6666      | NM_006943                                                                                         | SOX12     | SRY-box 12                                        | -2.185934 | 1.51729E-10 |
| 25928     | NM_015464                                                                                         | SOSTDC1   | sclerostin domain containing 1                    | -2.192398 | 1.24235E-20 |
| 115761    | NM_138450                                                                                         | ARL11     | ADP ribosylation factor like GTPase 11            | -2.194899 | 0.029047981 |
| 4322      | NM_002427                                                                                         | MMP13     | matrix metalloproteinase 13                       | -2.201102 | 0.005427818 |
| 1028      | NM_000076,NM_001122630,NM_001122631                                                               | CDKN1C    | cyclin dependent kinase inhibitor 1C              | -2.217160 | 3.65608E-06 |
| 55108     | NM_001143888,NM_001143889,NM_001143890,NM_001300958,NM_018045,NR_125352                           | BSDC1     | BSD domain containing 1                           | -2.217842 | 0.008689981 |

|       |                                                                                                                                                                                                                                                                                                                                                                                                                                                                                                                                                |         |                                                   |           |             |
|-------|------------------------------------------------------------------------------------------------------------------------------------------------------------------------------------------------------------------------------------------------------------------------------------------------------------------------------------------------------------------------------------------------------------------------------------------------------------------------------------------------------------------------------------------------|---------|---------------------------------------------------|-----------|-------------|
| 80790 | NM_030629,NM_198390                                                                                                                                                                                                                                                                                                                                                                                                                                                                                                                            | CMIP    | c-Maf inducing protein                            | -2.219218 | 0.026448742 |
| 11119 | NM_001145008,NM_001145009,NM_007048,NM_0194441                                                                                                                                                                                                                                                                                                                                                                                                                                                                                                 | BTN3A1  | butyrophilin subfamily 3 member A1                | -2.219566 | 3.75757E-06 |
| 84787 | NM_032701                                                                                                                                                                                                                                                                                                                                                                                                                                                                                                                                      | KMT5C   | lysine methyltransferase 5C                       | -2.220369 | 9.42585E-14 |
| 9771  | NM_012294                                                                                                                                                                                                                                                                                                                                                                                                                                                                                                                                      | RAPGEF5 | Rap guanine nucleotide exchange factor 5          | -2.223952 | 4.81324E-10 |
| 54899 | NM_001289095,NM_001289096,NM_001289098,NM_001289099,NM_001289100,NM_001289101,NM_001349488,NM_001349489,NM_001349490,NM_001349491,NM_001349492,NM_001349493,NM_001349494,NM_001349495,NM_001349496,NM_001349497,NM_001349498,NM_001349499,NM_001349500,NM_001349501,NM_001349502,NM_001349503,NM_001349504,NM_001349506,NM_001349507,NM_001349508,NM_001349509,NM_001349510,NM_001349511,NM_001349512,NM_001349513,NM_001349514,NM_001349515,NM_001349516,NM_001349517,NM_001349518,NM_001349519,NM_001349520,NM_001349521,NM_001349522,NM_001 | PXK     | PX domain containing serine/threonine kinase like | -2.224303 | 0.004090299 |

|           |                                                                                                                                                                                                                                                                                                      |              |                                                       |                          |             |
|-----------|------------------------------------------------------------------------------------------------------------------------------------------------------------------------------------------------------------------------------------------------------------------------------------------------------|--------------|-------------------------------------------------------|--------------------------|-------------|
|           | 349524,NM_001349525,<br>NM_001349526,NM_001<br>349527,NM_001349528,<br>NM_001349529,NM_001<br>349530,NM_001349531,<br>NM_001349532,NM_001<br>349533,NM_001349534,<br>NM_001349535,NM_001<br>349536,NM_001349537,<br>NM_001349538,NM_001<br>349539,NM_001349540,<br>NM_017771,NR_146193,<br>NR_146194 |              |                                                       |                          |             |
| 51265     | NM_001113575,NM_001<br>300853,NM_001349363,<br>NM_001349364,NM_001<br>349365,NM_001349366,<br>NM_016508                                                                                                                                                                                              | CDKL3        | cyclin dependent kinase like 3                        | -2.225359                | 0.003990332 |
| 100507564 | NR_038953                                                                                                                                                                                                                                                                                            | LOC100507564 | uncharacterized LOC100507564                          | -2.231478                | 0.034865193 |
| 374907    | NM_198540                                                                                                                                                                                                                                                                                            | B3GNT8       | UDP-GlcNAc:betaGal<br>acetylglucosaminyltransferase 8 | beta-1,3-N-<br>-2.235287 | 0.005485022 |
| 401427    | NM_001005328                                                                                                                                                                                                                                                                                         | OR2A7        | olfactory receptor family 2 subfamily A member<br>7   | -2.243263                | 0.028009991 |
| 2624      | NM_001145661,NM_001<br>145662,NM_032638                                                                                                                                                                                                                                                              | GATA2        | GATA binding protein 2                                | -2.247863                | 1.01379E-58 |
| 391322    | NM_001144931                                                                                                                                                                                                                                                                                         | LOC391322    | D-dopachrome tautomerase-like                         | -2.259800                | 0.033805828 |
| 79156     | NM_024310                                                                                                                                                                                                                                                                                            | PLEKHF1      | pleckstrin homology and FYVE domain<br>containing 1   | -2.275888                | 0.001262455 |
| 2302      | NM_001454                                                                                                                                                                                                                                                                                            | FOXJ1        | forkhead box J1                                       | -2.278521                | 0.001205449 |
| 91461     | NM_138370                                                                                                                                                                                                                                                                                            | PKDCC        | protein kinase domain containing, cytoplasmic         | -2.281410                | 6.13778E-27 |

|           |                                                                           |           |                                            |           |             |
|-----------|---------------------------------------------------------------------------|-----------|--------------------------------------------|-----------|-------------|
| 100124700 | NR_003716,NR_047517,<br>NR_047518                                         | HOTAIR    | HOX transcript antisense RNA               | -2.282267 | 9.66504E-18 |
| 400798    | NR_033186                                                                 | C1orf220  | chromosome 1 open reading frame 220        | -2.284086 | 0.044244403 |
| 55521     | NM_001017397,NM_001<br>017398,NM_001300752,<br>NM_001300759,NM_018<br>700 | TRIM36    | tripartite motif containing 36             | -2.285408 | 0.023430038 |
| 3223      | NM_004503,NM_153693                                                       | HOXC6     | homeobox C6                                | -2.285542 | 6.48658E-10 |
| 9481      | NM_001204051,NM_001<br>204052,NM_004277                                   | SLC25A27  | solute carrier family 25 member 27         | -2.285879 | 2.75173E-09 |
| 3660      | NM_002199                                                                 | IRF2      | interferon regulatory factor 2             | -2.289977 | 1.22045E-17 |
| 125170    | NM_001144900,NM_139<br>162,NM_148886                                      | MIEF2     | mitochondrial elongation factor 2          | -2.291195 | 1.68502E-17 |
| 283876    | NR_033904                                                                 | LINC00921 | long intergenic non-protein coding RNA 921 | -2.297351 | 0.018934569 |
| 93        | NM_001106                                                                 | ACVR2B    | activin A receptor type 2B                 | -2.299519 | 1.28607E-12 |
| 124751    | NM_001304947,NM_213<br>597                                                | KRBA2     | KRAB-A domain containing 2                 | -2.312777 | 0.016722397 |
| 55315     | NM_001174098,NM_018<br>344,NR_033413,NR_033<br>414                        | SLC29A3   | solute carrier family 29 member 3          | -2.315817 | 1.26613E-18 |
| 7294      | NM_003328                                                                 | TXK       | TXK tyrosine kinase                        | -2.317667 | 0.00172095  |
| 84666     | NM_032579                                                                 | RETNLB    | resistin like beta                         | -2.326930 | 0.045574408 |
| 53349     | NM_001281734,NM_001<br>281735,NM_021260,NM<br>_178441                     | ZFYVE1    | zinc finger FYVE-type containing 1         | -2.338932 | 1.4293E-08  |
| 23401     | NM_012083                                                                 | FRAT2     | FRAT2, WNT signaling pathway regulator     | -2.340012 | 2.37105E-32 |
| 5453      | NM_002699                                                                 | POU3F1    | POU class 3 homeobox 1                     | -2.342706 | 0.000444353 |

|           |                                                                            |              |                                                                  |           |             |
|-----------|----------------------------------------------------------------------------|--------------|------------------------------------------------------------------|-----------|-------------|
| 140738    | NM_183240                                                                  | TMEM37       | transmembrane protein 37                                         | -2.343463 | 1.8251E-05  |
| 121268    | NM_001303126,NM_144593,NR_130123                                           | RHEBL1       | Ras homolog enriched in brain like 1                             | -2.345184 | 0.000205079 |
| 80352     | NM_025236,NM_170769                                                        | RNF39        | ring finger protein 39                                           | -2.347094 | 1.55773E-10 |
| 10420     | NM_001320800,NM_007170                                                     | TESK2        | testis-specific kinase 2                                         | -2.349675 | 8.10348E-09 |
| 148418    | NM_001010971,NM_001134663,NM_001134664                                     | SAMD13       | sterile alpha motif domain containing 13                         | -2.350638 | 0.003101361 |
| 11067     | NM_007021                                                                  | C10orf10     | chromosome 10 open reading frame 10                              | -2.361606 | 2.39364E-07 |
| 80853     | NM_030647                                                                  | KDM7A        | lysine demethylase 7A                                            | -2.363573 | 4.90318E-10 |
| 4781      | NM_001190737,NM_001190738,NM_001282787,NM_005596                           | NFIB         | nuclear factor I B                                               | -2.375905 | 1.7552E-28  |
| 3706      | NM_002220                                                                  | ITPKA        | inositol-trisphosphate 3-kinase A                                | -2.384256 | 0.006760443 |
| 147011    | NM_001304949,NM_001304951,NM_001304952,NM_001304953,NM_001304954,NM_152465 | PROCA1       | protein interacting with cyclin A1                               | -2.385062 | 0.006041175 |
| 145788    | NM_001198784                                                               | C15orf65     | chromosome 15 open reading frame 65                              | -2.397576 | 1.42333E-06 |
| 3268      | NM_006076                                                                  | AGFG2        | ArfGAP with FG repeats 2                                         | -2.412339 | 4.30882E-32 |
| 100130172 | NR_037900                                                                  | LOC100130172 | uncharacterized LOC100130172                                     | -2.415106 | 0.024665799 |
| 8408      | NM_003565                                                                  | ULK1         | unc-51 like autophagy activating kinase 1                        | -2.421657 | 1.35572E-22 |
| 79849     | NM_001168468,NM_024791,NR_033122                                           | PDZD3        | PDZ domain containing 3                                          | -2.430099 | 0.000878735 |
| 55503     | NM_018646                                                                  | TRPV6        | transient receptor potential cation channel subfamily V member 6 | -2.434226 | 0.028217301 |
| 10402     | NM_001271142,NM_001                                                        | ST3GAL6      | ST3 beta-galactoside alpha-2,3-sialyltransferase                 | -2.436052 | 0.034746191 |

|        |                                                                                                                                                                                                                                                             |          |                                                     |           |             |
|--------|-------------------------------------------------------------------------------------------------------------------------------------------------------------------------------------------------------------------------------------------------------------|----------|-----------------------------------------------------|-----------|-------------|
|        | 271145,NM_001271146,<br>NM_001271147,NM_001<br>271148,NM_001323352,<br>NM_001323353,NM_001<br>323358,NM_001323359,<br>NM_001323360,NM_001<br>323362,NM_001323363,<br>NM_001323364,NM_001<br>323365,NM_001323366,<br>NM_001323367,NM_001<br>323368,NM_006100 | 6        |                                                     |           |             |
| 25822  | NM_001135004,NM_001<br>135005,NM_001349723,<br>NM_001349724,NM_001<br>349725,NM_012266                                                                                                                                                                      | DNAJB5   | DnaJ heat shock protein family (Hsp40) member<br>B5 | -2.436501 | 0.008953561 |
| 389384 | NM_001010903                                                                                                                                                                                                                                                | C6orf222 | chromosome 6 open reading frame 222                 | -2.436702 | 0.011930825 |
| 8646   | NM_001304472,NM_001<br>304473,NM_001304474,<br>NM_003741,NR_130747                                                                                                                                                                                          | CHRD     | chordin                                             | -2.448884 | 0.032337721 |
| 2263   | NM_000141,NM_001144<br>913,NM_001144914,NM<br>_001144915,NM_001144<br>916,NM_001144917,NM<br>_001144918,NM_001144<br>919,NM_001320654,NM<br>_001320658,NM_022970,<br>NM_023029,NR_073009                                                                    | FGFR2    | fibroblast growth factor receptor 2                 | -2.470570 | 5.91603E-38 |
| 146330 | NM_153350                                                                                                                                                                                                                                                   | FBXL16   | F-box and leucine rich repeat protein 16            | -2.470816 | 0.024139757 |
| 153020 | NM_001300735,NM_001<br>300736,NM_152545                                                                                                                                                                                                                     | RASGEF1B | RasGEF domain family member 1B                      | -2.471993 | 0.011721877 |
| 3760   | NM_001260508,NM_001                                                                                                                                                                                                                                         | KCNJ3    | potassium voltage-gated channel subfamily J         | -2.478320 | 0.00010366  |

|        |                                                                                        |           |                                                              |           |             |
|--------|----------------------------------------------------------------------------------------|-----------|--------------------------------------------------------------|-----------|-------------|
|        | 260509,NM_001260510,<br>NM_002239                                                      |           | member 3                                                     |           |             |
| 140893 | NM_080833                                                                              | RBBP8NL   | RBBP8 N-terminal like                                        | -2.480655 | 1.4903E-13  |
| 54943  | NM_001040192,NM_001<br>320746,NM_017833                                                | DNAJC28   | DnaJ heat shock protein family (Hsp40) member<br>C28         | -2.485050 | 0.003509181 |
| 84206  | NM_032246                                                                              | MEX3B     | mex-3 RNA binding family member B                            | -2.489985 | 0.00011926  |
| 51063  | NM_015916,NR_024552,<br>NR_046344                                                      | CALHM2    | calcium homeostasis modulator 2                              | -2.507757 | 4.94941E-10 |
| 171523 | NR_144551                                                                              | CYP2T1P   | cytochrome P450 family 2 subfamily T member<br>1, pseudogene | -2.508933 | 0.011223731 |
| 643224 | NR_027156                                                                              | TUBBP5    | tubulin beta pseudogene 5                                    | -2.515162 | 0.000756579 |
| 9881   | NM_001329998,NM_014<br>831                                                             | TRANK1    | tetratricopeptide repeat and ankyrin repeat<br>containing 1  | -2.515379 | 7.22618E-09 |
| 56670  | NM_033050                                                                              | SUCNR1    | succinate receptor 1                                         | -2.526491 | 0.013616041 |
| 9754   | NM_001142503,NM_001<br>142504,NM_014725                                                | STARD8    | StAR related lipid transfer domain containing 8              | -2.529701 | 0.007631885 |
| 4857   | NM_002515,NM_006489<br>,NM_006491                                                      | NOVA1     | NOVA alternative splicing regulator 1                        | -2.536522 | 0.002628715 |
| 284390 | NM_001012753                                                                           | ZNF763    | zinc finger protein 763                                      | -2.541747 | 0.002336205 |
| 150759 | NR_103734                                                                              | LINC00342 | long intergenic non-protein coding RNA 342                   | -2.541918 | 2.40694E-12 |
| 50640  | NM_001256007,NM_001<br>256008,NM_001256009,<br>NM_001256010,NM_001<br>256011,NM_015723 | PNPLA8    | patatin like phospholipase domain containing 8               | -2.549353 | 2.39178E-06 |
| 692247 | NR_147607,NR_147608                                                                    | LOC692247 | uncharacterized LOC692247                                    | -2.563328 | 0.034056902 |
| 440925 | NR_027433                                                                              | LINC01124 | long intergenic non-protein coding RNA 1124                  | -2.567584 | 0.014481564 |
| 1041   | NM_001264                                                                              | CDSN      | corneodesmosin                                               | -2.571259 | 0.023049373 |



|           |                                                                                         |          |                                                                  |           |             |
|-----------|-----------------------------------------------------------------------------------------|----------|------------------------------------------------------------------|-----------|-------------|
| 153222    | NM_001168393,NM_001168394,NM_153607                                                     | CREBRF   | CREB3 regulatory factor                                          | -2.592848 | 1.12361E-16 |
| 10008     | NM_005472                                                                               | KCNE3    | potassium voltage-gated channel subfamily E regulatory subunit 3 | -2.613029 | 1.34468E-46 |
| 5801      | NM_001207015,NM_001207016,NM_002849,NM_130846,NR_073474                                 | PTPRR    | protein tyrosine phosphatase, receptor type R                    | -2.619971 | 1.73308E-06 |
| 65249     | NM_023072                                                                               | ZSWIM4   | zinc finger SWIM-type containing 4                               | -2.623646 | 3.73855E-11 |
| 100506211 | NR_038262                                                                               | MIR210HG | MIR210 host gene                                                 | -2.624467 | 0.001465882 |
| 151050    | NM_001307976,NM_152519                                                                  | KANSL1L  | KAT8 regulatory NSL complex subunit 1 like                       | -2.635078 | 1.22658E-18 |
| 114991    | NM_001318040,NM_001318041,NM_001318042,NM_133374                                        | ZNF618   | zinc finger protein 618                                          | -2.637277 | 0.007742573 |
| 5166      | NM_002612                                                                               | PDK4     | pyruvate dehydrogenase kinase 4                                  | -2.643950 | 1.26808E-07 |
| 5727      | NM_000264,NM_001083602,NM_001083603,NM_001083604,NM_001083605,NM_001083606,NM_001083607 | PTCH1    | patched 1                                                        | -2.644359 | 7.62094E-24 |
| 7049      | NM_001195683,NM_001195684,NM_003243,NR_036634                                           | TGFBR3   | transforming growth factor beta receptor 3                       | -2.680618 | 3.05842E-20 |
| 84708     | NM_001126328,NM_032622                                                                  | LNK1     | ligand of numb-protein X 1                                       | -2.681327 | 3.67293E-13 |
| 203102    | NM_001313994,NM_145004                                                                  | ADAM32   | ADAM metalloproteinase domain 32                                 | -2.695968 | 0.045315912 |
| 54823     | NM_001105518,NM_017673                                                                  | SWT1     | SWT1, RNA endoribonuclease homolog                               | -2.697513 | 6.99381E-11 |

|           |                                     |           |                                                                      |           |             |
|-----------|-------------------------------------|-----------|----------------------------------------------------------------------|-----------|-------------|
| 255488    | NM_182757                           | RNF144B   | ring finger protein 144B                                             | -2.701887 | 4.6069E-13  |
| 388403    | NM_001005404                        | YPEL2     | yippee like 2                                                        | -2.702401 | 3.83035E-14 |
| 154043    | NM_173515                           | CNKSR3    | CNKSR family member 3                                                | -2.706868 | 0.014655299 |
| 570       | NM_001127610,NM_001701              | BAAT      | bile acid-CoA:amino acid N-acyltransferase                           | -2.714458 | 0.006142394 |
| 80054     | NR_026887                           | CEBPA-AS1 | CEBPA antisense RNA 1 (head to head)                                 | -2.746127 | 0.002053536 |
| 84225     | NM_001136046,NM_001267822,NM_032265 | ZMYND15   | zinc finger MYND-type containing 15                                  | -2.750226 | 0.028834904 |
| 283209    | NM_173582                           | PGM2L1    | phosphoglucomutase 2 like 1                                          | -2.775190 | 3.66781E-20 |
| 100129722 | NR_038389                           | STPG3-AS1 | STPG3 antisense RNA 1                                                | -2.783711 | 0.044087949 |
| 19        | NM_005502                           | ABCA1     | ATP binding cassette subfamily A member 1                            | -2.797493 | 1.07021E-09 |
| 9469      | NM_004273                           | CHST3     | carbohydrate sulfotransferase 3                                      | -2.816502 | 7.1416E-20  |
| 8000      | NM_005672,NR_033343                 | PSCA      | prostate stem cell antigen                                           | -2.823519 | 3.68944E-16 |
| 57730     | NM_025190                           | ANKRD36B  | ankyrin repeat domain 36B                                            | -2.827125 | 8.94813E-09 |
| 152926    | NM_152542                           | PPM1K     | protein phosphatase, Mg <sup>2+</sup> /Mn <sup>2+</sup> dependent 1K | -2.836499 | 2.04188E-12 |
| 400673    | NM_001017921                        | VMAC      | vimentin-type intermediate filament associated coiled-coil protein   | -2.850594 | 7.77788E-07 |
| 56204     | NM_001286495,NM_019600,NR_104457    | FAM214A   | family with sequence similarity 214 member A                         | -2.860436 | 1.12003E-12 |
| 728661    | NM_001110781,NM_001290264           | SLC35E2B  | solute carrier family 35 member E2B                                  | -2.867416 | 0.044463585 |
| 56964     | NM_001284395,NM_001284396,NM_020212 | WDR93     | WD repeat domain 93                                                  | -2.869681 | 0.037589887 |
| 80125     | NM_001287181,NM_025055,NM_182791    | CCDC33    | coiled-coil domain containing 33                                     | -2.884855 | 0.042331391 |
| 81788     | NM_030952                           | NUAK2     | NUAK family kinase 2                                                 | -2.930433 | 2.20151E-10 |

|           |                                                                                                                                                                                                                                                                                                                                                     |              |                                               |           |             |
|-----------|-----------------------------------------------------------------------------------------------------------------------------------------------------------------------------------------------------------------------------------------------------------------------------------------------------------------------------------------------------|--------------|-----------------------------------------------|-----------|-------------|
| 79170     | NM_024320                                                                                                                                                                                                                                                                                                                                           | PRR15L       | proline rich 15 like                          | -2.931377 | 2.76266E-28 |
| 868       | NM_001321786,NM_001321788,NM_001321789,NM_001321790,NM_001321791,NM_001321793,NM_001321794,NM_001321795,NM_001321796,NM_001321797,NM_001321798,NM_001321799,NM_001321806,NM_001321807,NM_001321808,NM_001321811,NM_001321813,NM_001321816,NM_001321820,NM_001321822,NM_170662,NR_135806,NR_135807,NR_135808,NR_135809,NR_135810,NR_135811,NR_135812 | CBLB         | Cbl proto-oncogene B                          | -2.933387 | 4.52894E-26 |
| 8743      | NM_001190942,NM_001190943,NM_003810,NR_033994                                                                                                                                                                                                                                                                                                       | TNFSF10      | TNF superfamily member 10                     | -2.937008 | 2.93864E-20 |
| 2306      | NM_004474                                                                                                                                                                                                                                                                                                                                           | FOXD2        | forkhead box D2                               | -2.939699 | 0.00014124  |
| 4306      | NM_000901,NM_001166104                                                                                                                                                                                                                                                                                                                              | NR3C2        | nuclear receptor subfamily 3 group C member 2 | -2.993710 | 0.00644183  |
| 10957     | NM_006813                                                                                                                                                                                                                                                                                                                                           | PNRC1        | proline rich nuclear receptor coactivator 1   | -2.996192 | 1.53335E-16 |
| 100996741 | NM_001348152                                                                                                                                                                                                                                                                                                                                        | LOC100996741 | uncharacterized LOC100996741                  | -3.018987 | 0.025225247 |
| 353355    | NM_001207005,NM_001330529,NM_181756                                                                                                                                                                                                                                                                                                                 | ZNF233       | zinc finger protein 233                       | -3.026900 | 4.33786E-05 |
| 604       | NM_001130845,NM_001134738,NM_001706                                                                                                                                                                                                                                                                                                                 | BCL6         | B-cell CLL/lymphoma 6                         | -3.061415 | 3.21364E-35 |

|           |                                                                            |              |                                                             |           |             |
|-----------|----------------------------------------------------------------------------|--------------|-------------------------------------------------------------|-----------|-------------|
| 389072    | NM_001080475                                                               | PLEKHM3      | pleckstrin homology domain containing M3                    | -3.064015 | 4.9333E-25  |
| 728039    | NR_027292                                                                  | SSR4P1       | signal sequence receptor subunit 4 pseudogene 1             | -3.086888 | 0.029732538 |
| 284161    | NM_001165993,NM_001165994,NM_182569                                        | GDPD1        | glycerophosphodiester phosphodiesterase domain containing 1 | -3.096141 | 0.008566433 |
| 389058    | NM_001003845                                                               | SP5          | Sp5 transcription factor                                    | -3.113411 | 1.58137E-08 |
| 1906      | NM_001168319,NM_001955                                                     | EDN1         | endothelin 1                                                | -3.117498 | 7.1134E-55  |
| 85376     | NM_015672                                                                  | RIMBP3       | RIMS binding protein 3                                      | -3.142990 | 0.036404038 |
| 6372      | NM_002993                                                                  | CXCL6        | C-X-C motif chemokine ligand 6                              | -3.155778 | 0.005594648 |
| 5013      | NM_001199770,NM_014562,NR_130153                                           | OTX1         | orthodenticle homeobox 1                                    | -3.254754 | 3.33608E-21 |
| 7832      | NM_006763                                                                  | BTG2         | BTG anti-proliferation factor 2                             | -3.285938 | 7.07287E-46 |
| 100134868 | NR_004846                                                                  | LOC100134868 | uncharacterized LOC100134868                                | -3.298808 | 0.026541877 |
| 100506084 | NM_001039083,NM_001103154,NM_001330240,NM_001330240_dup1,NM_001330240_dup2 | ARL17B       | ADP ribosylation factor like GTPase 17B                     | -3.316684 | 0.014368957 |
| 10194     | NM_001308210,NM_005786                                                     | TSHZ1        | teashirt zinc finger homeobox 1                             | -3.329511 | 1.09996E-48 |
| 83719     | NM_001145524,NM_031477                                                     | YPEL3        | yippee like 3                                               | -3.385649 | 1.98541E-23 |
| 84189     | NM_032229                                                                  | SLITRK6      | SLIT and NTRK like family member 6                          | -3.393941 | 3.28623E-50 |
| 494513    | NM_001042702                                                               | DFNB59       | deafness, autosomal recessive 59                            | -3.406434 | 0.007928289 |
| 63982     | NM_001313726,NM_001313727,NM_031418                                        | ANO3         | anoctamin 3                                                 | -3.433070 | 1.81407E-06 |
| 83875     | NM_001037290,NM_001256397,NM_001256398,                                    | BCO2         | beta-carotene oxygenase 2                                   | -3.436449 | 0.025476223 |

|        |                                                                                                                                                                                        |                        |                                                            |           |             |
|--------|----------------------------------------------------------------------------------------------------------------------------------------------------------------------------------------|------------------------|------------------------------------------------------------|-----------|-------------|
|        | NM_001256400,NM_031938                                                                                                                                                                 |                        |                                                            |           |             |
| 57653  | NR_036527,NR_036528, NR_036529                                                                                                                                                         | LOC100499484 -C9ORF174 | LOC100499484-C9orf174 readthrough                          | -3.496523 | 0.002753204 |
| 399821 | NR_033847                                                                                                                                                                              | FLJ37035               | uncharacterized LOC399821                                  | -3.509572 | 0.00294633  |
| 57507  | NM_020747                                                                                                                                                                              | ZNF608                 | zinc finger protein 608                                    | -3.513394 | 2.23631E-17 |
| 4602   | NM_001130172,NM_001130173,NM_001161656, NM_001161657,NM_001161658,NM_001161659, NM_001161660,NM_005375,NR_134958,NR_134959,NR_134960,NR_134961,NR_134962,NR_134963,NR_134964,NR_134965 | MYB                    | MYB proto-oncogene, transcription factor                   | -3.571684 | 4.01031E-28 |
| 26959  | NM_001244262,NM_012257                                                                                                                                                                 | HBP1                   | HMG-box transcription factor 1                             | -3.595660 | 3.1189E-56  |
| 333929 | NM_178310                                                                                                                                                                              | SNAI3                  | snail family transcriptional repressor 3                   | -3.615010 | 0.001287168 |
| 5624   | NM_000312                                                                                                                                                                              | PROC                   | protein C, inactivator of coagulation factors Va and VIIIa | -3.615844 | 0.006860512 |
| 3750   | NM_004979                                                                                                                                                                              | KCND1                  | potassium voltage-gated channel subfamily D member 1       | -3.637660 | 0.006085576 |
| 284723 | NM_207348                                                                                                                                                                              | SLC25A34               | solute carrier family 25 member 34                         | -3.651650 | 0.033507094 |
| 114800 | NM_001080433,NM_001348512,NM_001348513, NM_001348514,NM_001348515,NM_001348516                                                                                                         | CCDC85A                | coiled-coil domain containing 85A                          | -3.743221 | 0.041051922 |
| 113791 | NM_001135911,NM_052880                                                                                                                                                                 | PIK3IP1                | phosphoinositide-3-kinase interacting protein 1            | -3.749360 | 0.00056901  |

|           |                                                                                                                                                                                 |            |                                                     |           |             |
|-----------|---------------------------------------------------------------------------------------------------------------------------------------------------------------------------------|------------|-----------------------------------------------------|-----------|-------------|
| 83992     | NM_033427                                                                                                                                                                       | CTTNBP2    | cortactin binding protein 2                         | -3.758192 | 3.0954E-07  |
| 2199      | NM_001004019,NM_001165035,NM_001998                                                                                                                                             | FBLN2      | fibulin 2                                           | -3.882214 | 0.01144694  |
| 83478     | NM_001025616,NM_001042669,NM_001287805,NM_001346093,NM_031305                                                                                                                   | ARHGAP24   | Rho GTPase activating protein 24                    | -4.012685 | 0.002118861 |
| 53840     | NM_001003827,NM_021616,NM_130390                                                                                                                                                | TRIM34     | tripartite motif containing 34                      | -4.029748 | 0.020175162 |
| 440804    | NM_001128635,NM_001128635_dup1                                                                                                                                                  | RIMBP3B    | RIMS binding protein 3B                             | -4.117855 | 0.026404111 |
| 261729    | NM_001040665,NM_001040666,NM_001244944,NM_001244945,NM_001244946,NM_152999                                                                                                      | STEAP2     | STEAP2 metalloredutase                              | -4.144198 | 0.012923035 |
| 29799     | NM_013313,NR_130910                                                                                                                                                             | YPEL1      | yippee like 1                                       | -4.152153 | 5.80717E-05 |
| 114819    | NR_023386                                                                                                                                                                       | CROCCP3    | ciliary rootlet coiled-coil, rootletin pseudogene 3 | -4.291523 | 0.000212619 |
| 106821730 | NM_001128628,NM_001128629                                                                                                                                                       | BUB1B-PAK6 | BUB1B-PAK6 readthrough                              | -4.400101 | 0.035643721 |
| 25764     | NM_001199885,NM_016400                                                                                                                                                          | HYPK       | huntingtin interacting protein K                    | -4.550992 | 1.65864E-08 |
| 54800     | NM_001349413,NM_001349414,NM_001349415,NM_001349416,NM_001349417,NM_001349418,NM_001349419,NM_001349420,NM_001349421,NM_001349422,NM_001349423,NM_001349424,NM_001349425,NM_001 | KLHL24     | kelch like family member 24                         | -4.561804 | 3.56391E-07 |

|           |                                                                                         |          |                                                |            |             |
|-----------|-----------------------------------------------------------------------------------------|----------|------------------------------------------------|------------|-------------|
|           | 349426,NM_001349427,<br>NM_001349428,NM_001<br>349429,NM_017644,NR_<br>146169,NR_146170 |          |                                                |            |             |
| 729540    | NM_001037866,NM_001<br>037866_dup1,NM_00112<br>3363,NM_001123363_du<br>p1               | RGPD6    | RANBP2-like and GRIP domain containing 6       | -4.562495  | 0.036527558 |
| 10023     | NM_005479                                                                               | FRAT1    | FRAT1, WNT signaling pathway regulator         | -4.573867  | 5.05807E-10 |
| 23285     | NM_015237                                                                               | KIAA1107 | KIAA1107                                       | -4.606404  | 3.70513E-10 |
| 286204    | NM_173689,NR_104603                                                                     | CRB2     | crumbs 2, cell polarity complex component      | -4.717512  | 1.94476E-08 |
| 2886      | NM_001030002,NM_001<br>242442,NM_001242443,<br>NM_001330207,NM_005<br>310               | GRB7     | growth factor receptor bound protein 7         | -5.015969  | 7.35429E-69 |
| 729533    | NM_001123168,NM_001<br>317901,NR_134239                                                 | FAM72A   | family with sequence similarity 72 member A    | -5.067758  | 0.024565155 |
| 84159     | NM_001244638,NM_032<br>199                                                              | ARID5B   | AT-rich interaction domain 5B                  | -5.172166  | 1.4704E-105 |
| 26152     | NM_001290261,NM_015<br>655                                                              | ZNF337   | zinc finger protein 337                        | -6.200863  | 0.008729761 |
| 94241     | NM_001135733,NM_033<br>285                                                              | TP53INP1 | tumor protein p53 inducible nuclear protein 1  | -6.397238  | 5.99016E-15 |
| 3020      | NM_002107                                                                               | H3F3A    | H3 histone family member 3A                    | -13.262167 | 0.008363007 |
| 100861412 | NM_001256141                                                                            | FSBP     | fibrinogen silencer binding protein            | -13.296177 | 0.003590694 |
| 54809     | NM_001193307,NM_017<br>654                                                              | SAMD9    | sterile alpha motif domain containing 9        | -28.867482 | 0.010328588 |
| 729438    | NM_001145064                                                                            | CASTOR2  | cytosolic arginine sensor for mTORC1 subunit 2 | -29.786042 | 1.5073E-15  |

**Table S6** Gene ontology (GO) enrichment analysis of differentially expressed genes in HT-29 stimulated with wild-type spore

| GO ID | GO description                    | <i>p</i> -value | Corrected <i>p</i> -value <sup>a</sup> | Cluster frequency <sup>b</sup> | Total frequency <sup>c</sup> | Genes                                                                |
|-------|-----------------------------------|-----------------|----------------------------------------|--------------------------------|------------------------------|----------------------------------------------------------------------|
| 786   | nucleosome                        | 2.04E-08        | 1.77E-05                               | 6/48 12.5%                     | 65/17791<br>0.3%             | <i>HIST1H2BO HIST1H2AI HIST1H2BF HIST1H2BG<br/>HIST2H3C HIST1H3D</i> |
| 6334  | nucleosome assembly               | 9.00E-08        | 3.08E-05                               | 6/48 12.5%                     | 83/17791<br>0.4%             | <i>HIST1H2BO HIST1H2AI HIST1H2BF HIST1H2BG<br/>HIST2H3C HIST1H3D</i> |
| 31497 | chromatin assembly                | 1.20E-07        | 3.08E-05                               | 6/48 12.5%                     | 87/17791<br>0.4%             | <i>HIST1H2BO HIST1H2AI HIST1H2BF HIST1H2BG<br/>HIST2H3C HIST1H3D</i> |
| 65004 | protein-DNA complex assembly      | 1.67E-07        | 3.08E-05                               | 6/48 12.5%                     | 92/17791<br>0.5%             | <i>HIST1H2BO HIST1H2AI HIST1H2BF HIST1H2BG<br/>HIST2H3C HIST1H3D</i> |
| 34728 | nucleosome organization           | 1.78E-07        | 3.08E-05                               | 6/48 12.5%                     | 93/17791<br>0.5%             | <i>HIST1H2BO HIST1H2AI HIST1H2BF HIST1H2BG<br/>HIST2H3C HIST1H3D</i> |
| 32993 | protein-DNA complex               | 2.29E-07        | 3.30E-05                               | 6/48 12.5%                     | 97/17791<br>0.5%             | <i>HIST1H2BO HIST1H2AI HIST1H2BF HIST1H2BG<br/>HIST2H3C HIST1H3D</i> |
| 6323  | DNA packaging                     | 7.32E-07        | 9.04E-05                               | 6/48 12.5%                     | 118/17791<br>0.6%            | <i>HIST1H2BO HIST1H2AI HIST1H2BF HIST1H2BG<br/>HIST2H3C HIST1H3D</i> |
| 6333  | chromatin assembly or disassembly | 1.13E-06        | 1.22E-04                               | 6/48 12.5%                     | 127/17791<br>0.7%            | <i>HIST1H2BO HIST1H2AI HIST1H2BF HIST1H2BG<br/>HIST2H3C HIST1H3D</i> |
| 71103 | DNA conformation change           | 1.91E-06        | 1.84E-04                               | 6/48 12.5%                     | 139/17791<br>0.7%            | <i>HIST1H2BO HIST1H2AI HIST1H2BF HIST1H2BG<br/>HIST2H3C HIST1H3D</i> |
| 785   | chromatin                         | 1.64E-05        | 1.42E-03                               | 6/48 12.5%                     | 202/17791<br>1.1%            | <i>HIST1H2BO HIST1H2AI HIST1H2BF HIST1H2BG<br/>HIST2H3C HIST1H3D</i> |



|       |                                                      |          |          |            |                   |                                                                                           |
|-------|------------------------------------------------------|----------|----------|------------|-------------------|-------------------------------------------------------------------------------------------|
| 34622 | cellular macromolecular complex assembly             | 2.06E-05 | 1.62E-03 | 7/48 14.5% | 316/17791<br>1.7% | <i>TUBA1A HIST1H2BO HIST1H2AI HIST1H2BF<br/>HIST1H2BG HIST2H3C HIST1H3D</i>               |
| 34621 | cellular macromolecular complex subunit organization | 4.40E-05 | 3.17E-03 | 7/48 14.5% | 356/17791<br>2.0% | <i>TUBA1A HIST1H2BO HIST1H2AI HIST1H2BF<br/>HIST1H2BG HIST2H3C HIST1H3D</i>               |
| 65003 | macromolecular complex assembly                      | 6.95E-05 | 4.62E-03 | 9/48 18.7% | 676/17791<br>3.7% | <i>TUBA1A HIST1H2BO HIST1H2AI HIST1H2BF<br/>HIST1H2BG HIST2H3C PPARGC1A HIST1H3D TGM2</i> |
| 43933 | macromolecular complex subunit organization          | 1.17E-04 | 7.24E-03 | 9/48 18.7% | 724/17791<br>4.0% | <i>TUBA1A HIST1H2BO HIST1H2AI HIST1H2BF<br/>HIST1H2BG HIST2H3C PPARGC1A HIST1H3D TGM2</i> |
| 44427 | chromosomal part                                     | 6.10E-04 | 3.51E-02 | 6/48 12.5% | 391/17791<br>2.1% | <i>HIST1H2BO HIST1H2AI HIST1H2BF HIST1H2BG<br/>HIST2H3C HIST1H3D</i>                      |
| 22607 | cellular component assembly                          | 6.53E-04 | 3.53E-02 | 9/48 18.7% | 913/17791<br>5.1% | <i>TUBA1A HIST1H2BO HIST1H2AI HIST1H2BF<br/>HIST1H2BG HIST2H3C PPARGC1A HIST1H3D TGM2</i> |
| 6325  | chromatin organization                               | 8.12E-04 | 4.13E-02 | 6/48 12.5% | 413/17791<br>2.3% | <i>HIST1H2BO HIST1H2AI HIST1H2BF HIST1H2BG<br/>HIST2H3C HIST1H3D</i>                      |

<sup>a</sup> *p*-value in hypergeometric test after correction

<sup>b</sup> The denominator represents the total number of genes with GO annotation and the numerator represents the number of genes belonging to each GO term

<sup>c</sup> The denominator represents the number of reference genes with GO annotation and the numerator represents the number of references genes annotated in the listed GO terms

**Table S7** Gene ontology (GO) enrichment analysis of differentially expressed genes in HT-29 stimulated with CotG-p75

| GO ID | GO description         | <i>p</i> -value | Corrected <i>p</i> -value <sup>a</sup> | Cluster frequency <sup>b</sup> | Total frequency <sup>c</sup> | Genes                                                                                                                                                                                                                                                                                                                                                                                                                                                                                                                                                                                                                                 |                                                                                                                                                                                                                                                                                                                                                                                                                                                                                                                                                                                                                                                             |
|-------|------------------------|-----------------|----------------------------------------|--------------------------------|------------------------------|---------------------------------------------------------------------------------------------------------------------------------------------------------------------------------------------------------------------------------------------------------------------------------------------------------------------------------------------------------------------------------------------------------------------------------------------------------------------------------------------------------------------------------------------------------------------------------------------------------------------------------------|-------------------------------------------------------------------------------------------------------------------------------------------------------------------------------------------------------------------------------------------------------------------------------------------------------------------------------------------------------------------------------------------------------------------------------------------------------------------------------------------------------------------------------------------------------------------------------------------------------------------------------------------------------------|
| 48731 | system development     | 5.92E-12        | 2.04E-08                               | 103/387<br>26.6%               | 2421/17777<br>13.6%          | <i>ERRF1 CSF2 SERPINE1 TNC IRS2 AQP3 GJA5 MYC SALL4 DPF1 HOXA5 KIRREL3 EPHA4 UNC5B OSR1 ARID5B POU3F1 MYT1 GEM EREG TXNIP ULK1 TRIM15 TAGLN3 FREM2 FLG SEMA7A PKDCC TSHZ1 STC1 GATA2 OTX1 HOXC6 EGR1 FZD2 FZD4 PTCH1 LRRN4 NR0B2 ARHGAP24 POU6F1 EFNA1 NR4A2 IGSF10 GJB2 TMIE BCL6 FGF19 CYP1A1 SPRR1A SPRR1B CDKN1C GPSM1 CSRNP1 CDKN1A BTG2 PTPRR GAL3ST1 CXCL8 CITED2 CHD6 SECTM1 FASLG PTPRJ SOBP GLI2 LFNG SIX5 ZNF488 EID2B SNTA1 EDN1 ITPKB TGFBR3 SLC7A5 ALDH1A3 AHRR PDE5A RAPGEF5 IVL MDFI KDM7A HBEGF CHST3 SPRR3 SRF PTGS2 DLL4 ERBB3 SLITRK6 SH2B3 ATOH1 CDX2 WNT7B GRHL3 CCK ACVR2B APLN GATM EPGN DHRS9 KRT17 FMOD</i> |                                                                                                                                                                                                                                                                                                                                                                                                                                                                                                                                                                                                                                                             |
| 48856 | anatomical development | structure       | 1.24E-10                               | 2.14E-07                       | 106/387<br>27.3%             | 2655/17777<br>14.9%                                                                                                                                                                                                                                                                                                                                                                                                                                                                                                                                                                                                                   | <i>ERRF1 CSF2 SERPINE1 TNC IRS2 AQP3 GJA5 MYC SALL4 DPF1 HOXA5 KIRREL3 EPHA4 UNC5B OSR1 ARID5B BHLHA15 POU3F1 MYT1 GEM EREG TXNIP ULK1 TRIM15 TAGLN3 FREM2 FLG SEMA7A PKDCC TSHZ1 STC1 GATA2 OTX1 HOXC6 EGR1 FZD2 FZD4 PTCH1 LRRN4 NR0B2 ARHGAP24 POU6F1 EFNA1 NR4A2 IGSF10 GJB2 TMIE BCL6 FGF19 CYP1A1 SPRR1A SPRR1B CDKN1C GPSM1 CSRNP1 CDKN1A BTG2 PTPRR GAL3ST1 CXCL8 CITED2 SLC40A1 CHD6 SECTM1 FASLG PTPRJ SOBP GLI2 LFNG SIX5 ZNF488 EID2B SNTA1 EDN1 PTBP3 ITPKB TGFBR3 SLC7A5 ALDH1A3 AHRR PDE5A RAPGEF5 IVL MDFI KDM7A HBEGF CHST3 SPRR3 SRF PTGS2 DLL4 ERBB3 SLITRK6 SH2B3 ATOH1 CDX2 WNT7B GRHL3 CCK ACVR2B APLN GATM EPGN DHRS9 KRT17 FMOD</i> |

|       |                           |            |          |          |                  |                     |                                                                                                                                                                                                                                                                                                                                                                                                                                                                                                                                                                                                                                                                        |
|-------|---------------------------|------------|----------|----------|------------------|---------------------|------------------------------------------------------------------------------------------------------------------------------------------------------------------------------------------------------------------------------------------------------------------------------------------------------------------------------------------------------------------------------------------------------------------------------------------------------------------------------------------------------------------------------------------------------------------------------------------------------------------------------------------------------------------------|
| 48513 | organ development         |            | 2.82E-10 | 3.23E-07 | 80/387<br>20.6%  | 1791/17777<br>10.0% | <i>ERRF11 CSRNPI CDKN1A CSF2 CXCL8 CITED2 SERPINE1 TNC SECTM1 IRS2 FASLG PTPRJ SOBP AQP3 GLI2 LFNG SIX5 GJA5 MYC SALL4 HOXA5 EID2B SNTA1 KIRREL3 EDN1 OSR1 ARID5B POU3F1 GEM EREG ITPKB TGFB3 ALDH1A3 TXNIP AHRR ULK1 TRIM15 TAGLN3 FREM2 IVL MDFI KDM7A HBEGF FLG SPRR3 PKDCC SRF TSHZ1 GATA2 PTGS2 DLL4 ERBB3 OTX1 SH2B3 ATOH1 EGR1 FZD2 CDX2 WNT7B PTCH1 GRHL3 NR0B2 ACVR2B ARHGAP24 POU6F1 APLN EFNA1 IGSF10 GJB2 GATM TMIE EPGN DHRS9 BCL6 KRT17 FGF19 CYP1A1 FMOD SPRR1A SPRR1B</i>                                                                                                                                                                              |
| 9653  | anatomical morphogenesis  | structure  | 1.30E-08 | 1.12E-05 | 58/387<br>14.9%  | 1217/17777<br>6.8%  | <i>ERRF11 CSRNPI CDKN1A CXCL8 CITED2 SERPINE1 TNC SLC40A1 FASLG PTPRJ SOBP AQP3 GLI2 LFNG GJA5 MYC SALL4 HOXA5 EPHA4 EDN1 UNC5B OSR1 ARID5B GEM PTBP3 EREG TGFB3 ALDH1A3 ULK1 TRIM15 PDE5A FREM2 MDFI CHST3 FLG SRF TSHZ1 DLL4 ERBB3 SLITRK6 OTX1 ATOH1 FZD2 CDX2 WNT7B PTCH1 CCK NR0B2 ACVR2B ARHGAP24 EFNA1 NR4A2 IGSF10 GATM TMIE EPGN BCL6 FMOD</i>                                                                                                                                                                                                                                                                                                                |
| 7275  | multicellular development | organismal | 1.68E-08 | 1.16E-05 | 108/387<br>27.9% | 2970/17777<br>16.7% | <i>ERRF11 CSF2 SERPINE1 TNC IRS2 AQP3 FRAT1 FRAT2 GJA5 MYC SALL4 DPF1 HOXA5 KIRREL3 EPHA4 UNC5B OSR1 ARID5B POU3F1 MYT1 GEM EREG MFNG TXNIP ULK1 TRIM15 TAGLN3 FREM2 FLG SEMA7A PKDCC TSHZ1 STC1 GATA2 OTX1 HOXC6 EGR1 FZD2 FZD4 PTCH1 LRRN4 NR0B2 ARHGAP24 POU6F1 EFNA1 NR4A2 IGSF10 GJB2 TMIE BCL6 FGF19 CYP1A1 SPRR1A SPRR1B CDKN1C GPSM1 CSRNPI CDKN1A BTG2 PTPRR GAL3ST1 CXCL8 CITED2 CHD6 SECTM1 FASLG PTPRJ SOBP GLI2 LFNG SPRED3 SIX5 ZNF488 EID2B SNTA1 EDN1 ITPKB TGFB3 SLC7A5 ALDH1A3 AHRR PDE5A RAPGEF5 IVL MDFI KDM7A HBEGF CHST3 SPRR3 CATSPER2 SRF PTGS2 DLL4 ERBB3 SLITRK6 SH2B3 ATOH1 CDX2 WNT7B GRHL3 CCK ACVR2B APLN GATM EPGN DHRS9 KRT17 FMOD</i> |

|       |                                |          |          |                  |                     |                                                                                                                                                                                                                                                                                                                                                                                                                                                                                                                                                                                                                                                                                                                                                                                                                         |
|-------|--------------------------------|----------|----------|------------------|---------------------|-------------------------------------------------------------------------------------------------------------------------------------------------------------------------------------------------------------------------------------------------------------------------------------------------------------------------------------------------------------------------------------------------------------------------------------------------------------------------------------------------------------------------------------------------------------------------------------------------------------------------------------------------------------------------------------------------------------------------------------------------------------------------------------------------------------------------|
| 32502 | developmental process          | 6.15E-08 | 3.53E-05 | 113/387<br>29.1% | 3233/17777<br>18.1% | ERRFI1 CSF2 SERPINE1 TNC IRS2 AQP3 FRAT1 FRAT2<br>GJA5 MYC SALL4 DPF1 HOXA5 KIRREL3 EPHA4 UNC5B<br>OSR1 ARID5B BHLHA15 POU3F1 MYT1 GEM EREG<br>MFNG TXNIP ULK1 TRIM15 TAGLN3 FREM2 FLG<br>SEMA7A PKDCC TSHZ1 STC1 GATA2 OTX1 PPARGC1A<br>HOXC6 EGR1 FZD2 FZD4 PTCH1 LRRN4 NR0B2<br>ARHGAP24 POU6F1 EFNA1 NR4A2 IGSF10 GJB2 TMIE<br>BCL6 FGF19 CYP1A1 SPRR1A SPRR1B CDKN1C GPSM1<br>CSRNP1 CDKN1A BTG2 PTPRR GAL3ST1 CXCL8 CITED2<br>SLC40A1 CHD6 SECTM1 FASLG PTPRJ SOBP GLI2 LFNG<br>SPRED3 SIX5 ZNF488 EID2B SNTA1 EDN1 PTBP3 ITPKB<br>TGFB3 SLC7A5 ALDH1A3 AHRR PDE5A RAPGEF5 IVL<br>MDFI KDM7A HBEGF CHST3 SPRR3 CATSPER2 SRF<br>PTGS2 DLL4 ERBB3 SLITRK6 SH2B3 ATOH1 CDX2 WNT7B<br>GRHL3 CCK ACVR2B APLN GATM EPGN DHRS9 KRT17<br>FMOD FRK                                                                         |
| 48568 | embryonic organ development    | 2.58E-07 | 1.27E-04 | 19/387 4.9%      | 215/17777<br>1.2%   | FLG EDN1 PKDCC CDX2 CITED2 WNT7B TSHZ1 OSR1<br>GATA2 SOBP GLI2 EFNA1 ALDH1A3 TMIE OTX1 SH2B3<br>HOXA5 MDFI ATOH1                                                                                                                                                                                                                                                                                                                                                                                                                                                                                                                                                                                                                                                                                                        |
| 50794 | regulation of cellular process | 3.14E-07 | 1.35E-04 | 183/387<br>47.2% | 6218/17777<br>34.9% | ERRFI1 VIPR1 CSF2 TNFRSF6B ZBTB24 SERPINE1<br>GUCA1B TNC RORC JADE1 IRS2 CBLB KNDC1 AQP3<br>NR3C2 ARHGAP42 SESN3 MYC SESN1 SALL4 MYB LIPG<br>DPF1 PDK4 TNFSF10 FBXO8 PHLDA1 ZNF565 HOXA5<br>AGFG2 PRKCG EPHA4 PDIA2 UNC5B KMT5C MAMSTR<br>STARD8 OSR1 ARID5B DLEC1 SOX12 BHLHA15 POU3F1<br>MYT1 CPT1B GEM EREG KAT6B DDIT4 TXNIP ULK1<br>ZNF552 PTGES FLG CD274 ZNF792 GRB7 ZNF395 PKDCC<br>TXK TSHZ1 KRBA2 GATA2 RHOTB1 PDZD3 NUA2 OTX1<br>PPARGC1A HOXC6 ABCA1 EGR1 FZD2 SNAI3 PTCH1<br>CBX2 HTR1D ZBTB10 CIDEA NR0B2 ELL2 ARHGAP24<br>POU6F1 FOSL1 EFNA1 NR4A2 SEPSECS ARHGAP31<br>VNN1 DLG2 PROC BCL6 TRPV6 AGO4 GKAP1 FGF19<br>CCDC88C CAPRIN2 JMY CYP1A1 SP5 HBPI CALM2<br>HIST1H4D FGFR2 MXD4 CDKN1C ZNF512B GPSM1<br>CSRNP1 CDKN1A BTG2 CXCL8 CITED2 CITED4 HNF4G<br>CHD6 SECTM1 TNFAIP3 FASLG AREG GLI2 AKAP12 |

|       |                                                |          |          |                  |                     |                                                                                                                                                                                                                                                                                                                                                                                                                                                                                                                                                                                                        |
|-------|------------------------------------------------|----------|----------|------------------|---------------------|--------------------------------------------------------------------------------------------------------------------------------------------------------------------------------------------------------------------------------------------------------------------------------------------------------------------------------------------------------------------------------------------------------------------------------------------------------------------------------------------------------------------------------------------------------------------------------------------------------|
|       |                                                |          |          |                  |                     | <p><i>SPRED3 SIX5 RASGEF1B ANKRD1 JAK3 ZNF488 ZNF763 EID2B TIGD3 KDM6B ZNF362 EDN1 FOXD2 TNFRSF1B MTSS1 ITPKB ARL4C TGFB3 ALDH1A3 CNKSR3 IRF2 AHRR PDE5A RAPGEF5 MDFI KDM7A HBEGF CHST3 ZNF233 CREB5 INPP1 SRF RGS16 ADCY4 PTGS2 ADCY5 FGD2 DLL4 GNA14 ERBB3 DNAJB5 TP53INP1 GPAT3 BRD8 ATOH1 MAP3K3 CDX2 CCL20 GDF15 WNT7B GRHL3 CCK ACVR2B PNRC1 APLN EPGN ZNF618 ZYX RHEBL1 FRK BNIPL</i></p>                                                                                                                                                                                                       |
| 7166  | cell surface receptor linked signaling pathway | 4.06E-07 | 1.55E-04 | 56/387<br>14.4%  | 1279/17777<br>7.1%  | <p><i>CSRNP1 VIPR1 CXCL8 GUCA1B IRS2 CBLB PTPRJ AREG GLI2 AKAP12 FRAT1 FRAT2 SOSTDC1 EPHA4 EDN1 GPR37 ARID5B BHLHA15 TNFRSF1B MTSS1 GEM EREG ITPKB TGFB3 GIGYF1 TXNIP HBEGF FLG CD274 GRB7 ADCY4 STC1 ADCY5 NKD2 DLL4 GNA14 PDZD3 ERBB3 BRD8 ABCA1 GPR17 FZD2 FZD4 GDF15 WNT7B PTCH1 HTR1D CCK ACVR2B EFNA1 FGF19 CCDC88C HBP1 FMOD CALM2 FGFR2</i></p>                                                                                                                                                                                                                                                |
| 9887  | organ morphogenesis                            | 4.71E-07 | 1.62E-04 | 35/387 9.0%      | 634/17777<br>3.5%   | <p><i>FLG ERRF1 CSRNP1 CDKN1A SRF TSHZ1 TNC FASLG SOBP AQP3 GLI2 LFNG ERBB3 MYC OTX1 HOXA5 ATOH1 EDN1 CDX2 WNT7B OSR1 PTCH1 ARID5B NR0B2 ACVR2B GEM EREG EFNA1 TGFB3 ALDH1A3 TMIE TRIM15 FMOD FREM2 MDFI</i></p>                                                                                                                                                                                                                                                                                                                                                                                       |
| 50789 | regulation of biological process               | 1.20E-06 | 3.76E-04 | 188/387<br>48.5% | 6548/17777<br>36.8% | <p><i>ERRF1 VIPR1 CSF2 TNFRSF6B ZBTB24 SERPINE1 GUCA1B TNC RORC JADE1 IRS2 CBLB KNDC1 BEST3 AQP3 NR3C2 ARHGAP42 SESN3 MYC SESN1 SALL4 MYB LIPG DPF1 PDK4 TNFSF10 FBXO8 PHLDA1 ZNF565 HOXA5 AGFG2 PRKCG EPHA4 PDIA2 UNC5B KMT5C MAMSTR STARD8 OSR1 DIO3 ARID5B DLEC1 SOX12 BHLHA15 POU3F1 MYT1 CPT1B GEM EREG KAT6B DDIT4 TXNIP ULK1 ZNF552 PTGES FLG CD274 ZNF792 GRB7 ZNF395 PKDCC KCNE3 TXK TSHZ1 KRBA2 GATA2 RHOTB1 C2 PDZD3 NUA2 OTX1 PPARGC1A HOXC6 ABCA1 EGR1 FZD2 SNAI3 PTCH1 CBX2 HTR1D ZBTB10 CIDEA NR0B2 ELL2 ARHGAP24 POU6F1 FOSL1 EFNA1 NR4A2 SEPSECS ARHGAP31 VNN1 DLG2 PROC BCL6</i></p> |

|       |                       |          |          |                  |                     |                                                                                                                                                                                                                                                                                                                                                                                                                                                                                                                                                                                                                                                                                                                                                                                                                                                                                                                                                                                                                                                                                                                                                                                                                                                                                                                                                                                                                                                                                                                                                                                                                                                                                                                                                                                                                                           |
|-------|-----------------------|----------|----------|------------------|---------------------|-------------------------------------------------------------------------------------------------------------------------------------------------------------------------------------------------------------------------------------------------------------------------------------------------------------------------------------------------------------------------------------------------------------------------------------------------------------------------------------------------------------------------------------------------------------------------------------------------------------------------------------------------------------------------------------------------------------------------------------------------------------------------------------------------------------------------------------------------------------------------------------------------------------------------------------------------------------------------------------------------------------------------------------------------------------------------------------------------------------------------------------------------------------------------------------------------------------------------------------------------------------------------------------------------------------------------------------------------------------------------------------------------------------------------------------------------------------------------------------------------------------------------------------------------------------------------------------------------------------------------------------------------------------------------------------------------------------------------------------------------------------------------------------------------------------------------------------------|
|       |                       |          |          |                  |                     | <p>TRPV6 AGO4 GKAP1 FGF19 CCDC88C CAPRIN2 JMY<br/> CYP1A1 SP5 HBP1 CALM2 HIST1H4D FGFR2 MXD4<br/> CDKN1C ZNF512B GPSM1 CSRNPI CDKN1A BTG2<br/> CXCL8 CITED2 CITED4 HNF4G CHD6 SECTM1 TNFAIP3<br/> FASLG AREG GLI2 AKAP12 SPRED3 H2AFJ SIX5<br/> RASGEF1B ANKRD1 JAK3 ZNF488 ZNF763 EID2B TIGD3<br/> KDM6B ZNF362 EDN1 FOXD2 TNFRSF1B MTSS1 ITPKB<br/> ARL4C TGFBR3 ALDH1A3 CNKSR3 IRF2 AHRR PDE5A<br/> RAPGEF5 MDFI KDM7A HBEGF CHST3 ZNF233 CREB5<br/> INPP1 SRF RGS16 ADCY4 PTGS2 ADCY5 FGD2 DLL4<br/> GNA14 ERBB3 DNAJB5 TP53INP1 GPAT3 BRD8 ATOH1<br/> MAP3K3 CDX2 CCL20 GDF15 WNT7B GRHL3 CCK<br/> ACVR2B PNRC1 APLN EPGN ZNF618 ZYX RHEBL1 FRK<br/> BNIPL</p> <p>ERRFI1 VIPR1 TNFRSF6B SERPINE1 CBLB AQP3 MYC<br/> MYB LIPG DPF1 PDK4 TNFSF10 CYP1B1 FBXO8 HOXA5<br/> AGFG2 PRKCG EPHA4 UNC5B STARD8 DLEC1 SOX12<br/> BHLHA15 CPT1B EREG DDIT4 TXNIP ULK1 PTGES FLG<br/> GRB7 ZNF395 TXK TSHZ1 STC1 GATA2 C2 NUAKE<br/> PPARGC1A HOXC6 ABCA1 EGR1 FZD2 SNAI3 CIDEA<br/> NR0B2 ELL2 POU6F1 FOSL1 VNN1 AGO4 GKAP1<br/> CCDC88C CYP1A1 HBP1 CALM2 HIST1H4D CDKN1C<br/> CSRNPI CDKN1A BTG2 CITED2 CITED4 HNF4G SECTM1<br/> AREG GLI2 AKAP12 ANKRD1 JAK3 ZNF488 TIGD3<br/> ZNF362 EDN1 FOXD2 MTSS1 ITPKB CNKSR3 AHRR<br/> RAPGEF5 MDFI HBEGF CHST3 ZNF233 INPP1 ADCY4<br/> PTGS2 ADCY5 FGD2 GPAT3 BRD8 MAP3K3 CDX2 CCL20<br/> GDF15 WNT7B GAD1 GRHL3 EPGN DHRS9 ZYX FRK<br/> CSF2 ZBTB24 GUCA1B TNC RORC JADE1 IRS2 KND1<br/> BEST3 NR3C2 ARHGAP42 SESN3 SESN1 SALL4 PHLDA1<br/> ZNF565 PDIA2 KMT5C MAMSTR OSR1 DIO3 ARID5B<br/> POU3F1 MYT1 GEM KAT6B ZNF552 CD274 ZNF792<br/> PKDCC KCNE3 KRBA2 RHOTB1 PDZD3 OTX1 PTCH1<br/> CBX2 HTR1D ZBTB10 ARHGAP24 EFNA1 NR4A2 SEPSECS<br/> ARHGAP31 DLG2 PROC BCL6 TRPV6 FGF19 CAPRIN2<br/> JMY SP5 FGFR2 MXD4 ZNF512B GPSM1 GAL3ST1 CXCL8<br/> SLC40A1 CHD6 TNFAIP3 FASLG SPRED3 H2AFJ SIX5</p> |
| 65007 | biological regulation | 1.82E-06 | 5.21E-04 | 196/387<br>50.6% | 6937/17777<br>39.0% |                                                                                                                                                                                                                                                                                                                                                                                                                                                                                                                                                                                                                                                                                                                                                                                                                                                                                                                                                                                                                                                                                                                                                                                                                                                                                                                                                                                                                                                                                                                                                                                                                                                                                                                                                                                                                                           |

|       |                                                     |          |          |                  |                     |                                                                                                                                                                                                                                                                                                                                                                                                                                                                                                                                                                                                                                                                                                                                   |
|-------|-----------------------------------------------------|----------|----------|------------------|---------------------|-----------------------------------------------------------------------------------------------------------------------------------------------------------------------------------------------------------------------------------------------------------------------------------------------------------------------------------------------------------------------------------------------------------------------------------------------------------------------------------------------------------------------------------------------------------------------------------------------------------------------------------------------------------------------------------------------------------------------------------|
|       |                                                     |          |          |                  |                     | <i>RASGEF1B ZNF763 EID2B KDM6B TNFRSF1B ARL4C<br/> TGFB3 ALDH1A3 IRF2 PDE5A KDM7A CREB5 SRF<br/> RGS16 DLL4 GNA14 ERBB3 DNAJB5 TP53INP1 BCO2<br/> ATOH1 HSD3B1 CCK ACVR2B PNRC1 APLN ZNF618<br/> RHEBL1 BNIPL</i>                                                                                                                                                                                                                                                                                                                                                                                                                                                                                                                 |
| 7167  | enzyme linked receptor<br>protein signaling pathway | 2.29E-06 | 6.06E-04 | 23/387 5.9%      | 346/17777<br>1.9%   | <i>FLG EPHA4 GRB7 CSRNPI GDF15 GUCA1B ARID5B IRS2<br/> PTPRJ AREG ACVR2B MTSS1 EREG EFNA1 TGFB3<br/> GIGYF1 PDZD3 ERBB3 FGF19 TXNIP FMOD FGFR2<br/> HBEGF</i>                                                                                                                                                                                                                                                                                                                                                                                                                                                                                                                                                                     |
| 48523 | negative regulation of cellular<br>process          | 2.49E-06 | 6.13E-04 | 70/387<br>18.0%  | 1844/17777<br>10.3% | <i>CDKN1C ERRF11 CDKN1A BTG2 CSF2 TNFRSF6B CXCL8<br/> CITED2 SERPINE1 JADE1 TNFAIP3 IRS2 CBLB GLI2<br/> SESN3 SIX5 MYC SESN1 SALL4 HOXA5 PRKCG KDM6B<br/> EDN1 OSR1 ARID5B DLEC1 GEM EREG TGFB3 KAT6B<br/> DDIT4 CNKSR3 IRF2 TXNIP ULK1 MDFI HBEGF PTGES<br/> FLG CD274 PKDCC RGS16 PTGS2 DLL4 PDZD3 NUA2<br/> ERBB3 DNAJB5 TP53INP1 ABCA1 EGR1 CDX2 PTCH1<br/> CBX2 CCK NR0B2 FOSL1 NR4A2 VNN1 PROC BCL6 AGO4<br/> FGF19 CAPRIN2 JMY HBP1 HIST1H4D FRK MXD4 BNIPL</i>                                                                                                                                                                                                                                                            |
| 23052 | signaling                                           | 2.99E-06 | 6.46E-04 | 104/387<br>26.8% | 3130/17777<br>17.6% | <i>VIPR1 GUCA1B TNC IRS2 CBLB NR3C2 FRAT1 ARHGAP42<br/> FRAT2 GJA5 PDK4 TNFSF10 HOXA5 EPHA4 UNC5B<br/> STARD8 OSR1 ARID5B BHLHA15 POU3F1 GEM EREG<br/> TXNIP ULK1 PTGES FLG CD274 GRB7 TXK STC1 EFNA4<br/> RHOB2 PDZD3 PPARGC1A ABCA1 GPR17 FZD2 FZD4<br/> PTCH1 HTR1D CIDEA NR0B2 ARHGAP24 EFNA1 NR4A2<br/> GJB2 EFNA3 ARHGAP31 DLG2 GKAP1 FGF19 CCDC88C<br/> HBP1 CALM2 HIST1H4D FGFR2 GPSM1 CSRNPI<br/> CDKN1A GAL3ST1 CXCL8 FASLG PTPRJ AREG GLI2<br/> AKAP12 SPRED3 ANKRD1 SOSTDC1 JAK3 EDN1 GPR37<br/> TNFRSF1B MTSS1 ITPKB ARL4C TGFB3 GIGYF1 PDE5A<br/> RAPGEF5 MDFI HBEGF INPP1 ADCY4 ADCY5 NKD2<br/> DLL4 GNA14 ERBB3 BRD8 SH2B3 MAP3K3 CCL20 GDF15<br/> WNT7B GAD1 CCK ACVR2B APLN EPGN NOVA1 ZYX<br/> FMOD RHEBL1</i> |

|       |                                           |          |          |                 |                     |                                                                                                                                                                                                                                                                                                                                                                                                                                                           |
|-------|-------------------------------------------|----------|----------|-----------------|---------------------|-----------------------------------------------------------------------------------------------------------------------------------------------------------------------------------------------------------------------------------------------------------------------------------------------------------------------------------------------------------------------------------------------------------------------------------------------------------|
| 9888  | tissue development                        | 3.01E-06 | 6.46E-04 | 37/387 9.5%     | 748/17777<br>4.2%   | <i>FLG ERRF11 SPRR3 CITED2 SRF SERPINE1 TNC SECTM1 PTGS2 GLI2 ERBB3 MYC SALL4 HOXA5 SNTA1 EDN1 FZD2 WNT7B OSR1 PTCH1 GRHL3 POU3F1 ACVR2B EREG TGFBR3 IGSF10 ALDH1A3 GATM DHRS9 KRT17 FGF19 TXNIP TRIM15 SPRR1A FREM2 IVL SPRR1B</i>                                                                                                                                                                                                                       |
| 7154  | cell communication                        | 3.25E-06 | 6.58E-04 | 39/387<br>10.0% | 812/17777<br>4.5%   | <i>FLG CDKN1A VIPR1 GAL3ST1 GUCA1B TNC STC1 FASLG PTPRJ AREG EFNA4 GLI2 DLL4 NUA2 GJA5 TNFSF10 ENPP5 HOXA5 EDN1 FZD2 FZD4 CCL20 GDF15 WNT7B GAD1 HTR1D BHLHA15 POU3F1 ACVR2B EREG FOSL1 EFNA1 NR4A2 GJB2 SNX18 EFNA3 NOVA1 ZYX FREM2</i>                                                                                                                                                                                                                  |
| 48519 | negative regulation of biological process | 4.38E-06 | 8.37E-04 | 74/387<br>19.1% | 2019/17777<br>11.3% | <i>CDKN1C ERRF11 CDKN1A BTG2 CSF2 TNFRSF6B CXCL8 CITED2 SERPINE1 JADE1 TNFAIP3 IRS2 FASLG CBLB BEST3 GLI2 SESN3 SIX5 MYC SESN1 SALL4 HOXA5 PRKCG KDM6B EDN1 OSR1 ARID5B DLEC1 TNFRSF1B GEM EREG TGFBR3 KAT6B DDIT4 CNKSR3 IRF2 TXNIP ULK1 MDFI HBEGF PTGES FLG CD274 PKDCC RGS16 PTGS2 DLL4 PDZD3 NUA2 ERBB3 DNAJB5 TP53INP1 ABCA1 EGR1 CDX2 PTCH1 CBX2 CCK NR0B2 FOSL1 NR4A2 VNN1 PROC BCL6 AGO4 FGF19 CAPRN2 JMY HBP1 CALM2 HIST1H4D FRK MXD4 BNIPL</i> |
| 60429 | epithelium development                    | 4.86E-06 | 8.69E-04 | 22/387 5.6%     | 336/17777<br>1.8%   | <i>FLG ERRF11 SPRR3 EDN1 FZD2 WNT7B SRF OSR1 PTCH1 TNC POU3F1 GLI2 EREG ALDH1A3 DHRS9 MYC TXNIP SPRR1A HOXA5 FREM2 IVL SPRR1B</i>                                                                                                                                                                                                                                                                                                                         |
| 6464  | protein modification process              | 5.05E-06 | 8.69E-04 | 60/387<br>15.5% | 1526/17777<br>8.5%  | <i>CDKN1A BTG2 PTPRR GAL3ST1 JADE1 TESK2 TNFAIP3 PTPRJ PDK4 JAK3 PCMTD1 PRKCG KDM6B DUSP5 EPHA4 CDKL5 KMT5C OSR1 MAMDC2 MYT1 TGFBR3 RNF144B B3GNT8 KAT6B PADI3 PADI2 ULK1 PDZRN3 PADI1 IVL MDFI KDM7A FLG LIPT2 OTUB2 PKDCC TXK PPM1K FUT2 GNA14 NUA2 ERBB3 ST3GAL4 BRD8 ABCA1 MAP3K3 GAD1 B3GALT4 CCK ACVR2B EFNA1 MEX3B EPGN MGAT4A LNX1 PTPN7 SPRR1A FRK SPRR1B FGFR2</i>                                                                              |



|       |                                                        |                    |          |          |                 |                     |                                                                                                                                                                                                                                                                                                                                                                                                                                                                                                                      |
|-------|--------------------------------------------------------|--------------------|----------|----------|-----------------|---------------------|----------------------------------------------------------------------------------------------------------------------------------------------------------------------------------------------------------------------------------------------------------------------------------------------------------------------------------------------------------------------------------------------------------------------------------------------------------------------------------------------------------------------|
| 7169  | transmembrane<br>protein tyrosine<br>signaling pathway | receptor<br>kinase | 6.48E-06 | 1.06E-03 | 17/387 4.3%     | 219/17777<br>1.2%   | <i>FLG EPHA4 GRB7 CSRNPI ARID5B IRS2 PTPRJ AREG<br/>MTSSI EREG EFNA1 GIGYF1 ERBB3 FGF19 TXNIP<br/>FGFR2 HBEGF</i>                                                                                                                                                                                                                                                                                                                                                                                                    |
| 9790  | embryonic development                                  |                    | 8.96E-06 | 1.39E-03 | 31/387 8.0%     | 602/17777<br>3.3%   | <i>FLG PTPRR PKDCC CITED2 SRF TSHZ1 GATA2 SOBP<br/>GLI2 FRAT1 GJA5 SALL4 OTX1 SH2B3 HOXA5 ATOH1<br/>HOXC6 EDN1 CDX2 WNT7B OSR1 PTCH1 ACVR2B EFNA1<br/>ALDH1A3 GATM TMIE CYP1A1 AHRR TRIM15 MDFI</i>                                                                                                                                                                                                                                                                                                                  |
| 23033 | signaling pathway                                      |                    | 9.28E-06 | 1.39E-03 | 75/387<br>19.3% | 2099/17777<br>11.8% | <i>CSRNPI CDKN1A VIPR1 CXCL8 GUCA1B IRS2 CBLB<br/>PTPRJ AREG GLI2 AKAP12 SPRED3 FRAT1 FRAT2<br/>SOSTDC1 JAK3 EPHA4 EDN1 GPR37 OSR1 ARID5B<br/>BHLHA15 TNFRSF1B MTSSI GEM EREG ITPKB ARL4C<br/>TGFB3 GIGYF1 TXNIP ULK1 RAPGEF5 MDFI HBEGF<br/>FLG CD274 GRB7 TXK ADCY4 STC1 RHOBTB1 ADCY5<br/>NKD2 DLL4 GNA14 PDZD3 ERBB3 BRD8 PPARGC1A<br/>SH2B3 ABCA1 GPR17 MAP3K3 FZD2 FZD4 GDF15 WNT7B<br/>PTCH1 HTR1D CIDEB CCK NR0B2 ACVR2B EFNA1 EPGN<br/>ARHGAP31 FGF19 CCDC88C HBP1 FMOD RHEBL1<br/>CALM2 HIST1H4D FGFR2</i> |
| 30154 | cell differentiation                                   |                    | 1.02E-05 | 1.47E-03 | 63/387<br>16.2% | 1668/17777<br>9.3%  | <i>CDKN1C GPSM1 BTG2 PTPRR CSF2 CITED2 TNC FASLG<br/>PTPRJ GLI2 SIX5 ZNF488 HOXA5 EID2B SNTA1 EPHA4<br/>EDN1 UNC5B BHLHA15 POU3F1 MYT1 EREG ITPKB<br/>TGFB3 SLC7A5 TXNIP AHRR ULK1 TRIM15 IVL MDFI<br/>CHST3 FLG SPRR3 SEMA7A CATSPER2 PKDCC SRF<br/>GATA2 DLL4 ERBB3 SLITRK6 PPARGC1A SH2B3 ATOH1<br/>EGR1 FZD2 CDX2 FZD4 WNT7B PTCH1 CCK ARHGAP24<br/>EFNA1 NR4A2 IGSF10 DHRS9 BCL6 FGF19 CYP1A1<br/>SPRR1A FRK SPRR1B</i>                                                                                         |
| 48562 | embryonic<br>morphogenesis                             | organ              | 1.19E-05 | 1.64E-03 | 13/387 3.3%     | 140/17777<br>0.7%   | <i>FLG EDN1 TSHZ1 OSR1 SOBP GLI2 EFNA1 ALDH1A3<br/>TMIE OTX1 HOXA5 MDFI ATOH1</i>                                                                                                                                                                                                                                                                                                                                                                                                                                    |
| 42471 | ear morphogenesis                                      |                    | 1.24E-05 | 1.64E-03 | 9/387 2.3%      | 66/17777<br>0.3%    | <i>FLG TMIE EDN1 TSHZ1 OSR1 OTX1 SOBP ATOH1 GLI2</i>                                                                                                                                                                                                                                                                                                                                                                                                                                                                 |

|       |                                |               |          |          |                 |                     |                                                                                                                                                                                                                                                                                                                                                                                                                          |
|-------|--------------------------------|---------------|----------|----------|-----------------|---------------------|--------------------------------------------------------------------------------------------------------------------------------------------------------------------------------------------------------------------------------------------------------------------------------------------------------------------------------------------------------------------------------------------------------------------------|
| 9913  | epidermal cell differentiation |               | 1.59E-05 | 2.02E-03 | 9/387 2.3%      | 68/17777<br>0.3%    | FLG SPRR3 TXNIP POU3F1 SPRR1A IVL SPRR1B GLI2 EREG                                                                                                                                                                                                                                                                                                                                                                       |
| 7165  | signal transduction            |               | 1.70E-05 | 2.09E-03 | 68/387<br>17.5% | 1877/17777<br>10.5% | GPSM1 CDKN1A VIPR1 CXCL8 GUCA1B TNC IRS2 FASLG CBLB NR3C2 AKAP12 SPRED3 ARHGAP42 PDK4 TNFSF10 ANKRD1 JAK3 EPHA4 EDN1 UNC5B STARD8 OSR1 BHLHA15 MTSS1 GEM EREG ITPKB ARL4C TGFB3 ULK1 PDE5A RAPGEF5 MDFI HBEGF PTGES FLG CD274 GRB7 INPP1 TXK ADCY4 RHOBTB1 ADCY5 DLL4 GNA14 PDZD3 ERBB3 BRD8 ABCA1 MAP3K3 FZD2 CCL20 GDF15 PTCH1 HTR1D CCK ACVR2B ARHGAP24 APLN EFNA1 NR4A2 EPGN ARHGAP31 DLG2 GKAP1 ZYX RHEBL1 HIST1H4D |
| 48869 | cellular process               | developmental | 2.38E-05 | 2.78E-03 | 63/387<br>16.2% | 1714/17777<br>9.6%  | CDKN1C GPSM1 BTG2 PTPRR CSF2 CITED2 TNC FASLG PTPRJ GLI2 SIX5 ZNF488 HOXA5 EID2B SNTA1 EPHA4 EDN1 UNC5B BHLHA15 POU3F1 MYT1 EREG ITPKB TGFB3 SLC7A5 TXNIP AHRR ULK1 TRIM15 IVL MDFI CHST3 FLG SPRR3 SEMA7A CATSPER2 PKDCC SRF GATA2 DLL4 ERBB3 SLITRK6 PPARGC1A SH2B3 ATOH1 EGR1 FZD2 CDX2 FZD4 WNT7B PTCH1 CCK ARHGAP24 EFNA1 NR4A2 IGSF10 DHRS9 BCL6 FGF19 CYP11A1 SPRR1A FRK SPRR1B                                   |
| 43412 | macromolecule modification     |               | 2.42E-05 | 2.78E-03 | 60/387<br>15.5% | 1607/17777<br>9.0%  | CDKN1A BTG2 PTPRR GAL3ST1 JADE1 TESK2 TNFAIP3 PTPRJ PDK4 JAK3 PCMTD1 PRKCG KDM6B DUSP5 EPHA4 CDKL5 KMT5C OSR1 MAMDC2 MYT1 TGFB3 RNF144B B3GNT8 KAT6B PADI3 PADI2 ULK1 PDZRN3 PADI1 IVL MDFI KDM7A FLG LIPT2 OTUB2 PKDCC TXK PPM1K FUT2 GNA14 NUA2 ERBB3 ST3GAL4 BRD8 ABCA1 MAP3K3 GAD1 B3GALT4 CCK ACVR2B EFNA1 MEX3B EPGN MGAT4A LNX1 PTPN7 SPRR1A FRK SPRR1B FGFR2                                                     |
| 7389  | pattern specification process  |               | 2.93E-05 | 3.25E-03 | 18/387 4.6%     | 271/17777<br>1.5%   | BTG2 EDN1 CDX2 CITED2 WNT7B SRF TSHZ1 PTCH1 GRHL3 ACVR2B GLI2 LFNG FRAT1 MFNG OTX1 HOXA5 MDFI HOXC6                                                                                                                                                                                                                                                                                                                      |

|       |                                           |          |          |               |                  |                                                                                                                                                                                                                                                                                                                                                                                                                                                                                                                                                                                                                                                                                                                                                                                      |
|-------|-------------------------------------------|----------|----------|---------------|------------------|--------------------------------------------------------------------------------------------------------------------------------------------------------------------------------------------------------------------------------------------------------------------------------------------------------------------------------------------------------------------------------------------------------------------------------------------------------------------------------------------------------------------------------------------------------------------------------------------------------------------------------------------------------------------------------------------------------------------------------------------------------------------------------------|
| 42573 | retinoic acid metabolic process           | 3.23E-05 | 3.47E-03 | 5/387 1.2%    | 18/17777 0.1%    | <i>ALDH1A3 DHRS9 CYP1A1 AHRR BCO2</i>                                                                                                                                                                                                                                                                                                                                                                                                                                                                                                                                                                                                                                                                                                                                                |
| 60021 | palate development                        | 3.60E-05 | 3.75E-03 | 7/387 1.8%    | 43/17777 0.2%    | <i>TGFBR3 CSRNPI PKDCC TSHZ1 OSR1 ARID5B ACVR2B</i>                                                                                                                                                                                                                                                                                                                                                                                                                                                                                                                                                                                                                                                                                                                                  |
| 48598 | embryonic morphogenesis                   | 5.10E-05 | 5.09E-03 | 20/387 5.1%   | 336/17777 1.8%   | <i>FLG EDN1 WNT7B SRF TSHZ1 OSR1 PTCH1 SOBP ACVR2B GLI2 EFNA1 ALDH1A3 TMIE GJA5 SALL4 TRIM15 OTX1 HOXA5 MDFI ATOH1</i>                                                                                                                                                                                                                                                                                                                                                                                                                                                                                                                                                                                                                                                               |
| 48518 | positive regulation of biological process | 5.18E-05 | 5.09E-03 | 75/387 19.3%  | 2207/17777 12.4% | <i>CDKN1C CSRNPI CDKN1A BTG2 VIPR1 CSF2 CXCL8 CITED2 SERPINE1 CITED4 SECTM1 IRS2 FASLG CBLB AREG AQP3 GLI2 AKAP12 MYC SALL4 LIPG DPF1 TNFSF10 ZNF488 PHLDA1 HOXA5 PRKCG EDN1 OSR1 DIO3 BHLHA15 POU3F1 EREG ITPKB ALDH1A3 KAT6B CNKSR3 TXNIP AHRR PDE5A HBEGF CHST3 CREB5 FLG PKDCC SRF GATA2 PTGS2 C2 FGD2 ERBB3 TP53INP1 PPARGC1A ATOH1 ABCA1 EGR1 MAP3K3 CDX2 WNT7B CIDEA GRHL3 CCK NR0B2 ACVR2B FOSL1 NR4A2 EPGN VNN1 BCL6 FGF19 JMY CYP1A1 CALM2 FGFR2 BNIPL</i>                                                                                                                                                                                                                                                                                                                 |
| 32501 | multicellular organismal process          | 5.88E-05 | 5.50E-03 | 129/387 33.3% | 4374/17777 24.6% | <i>ERRFI1 VIPR1 CSF2 SERPINE1 GUCA1B TNC TESK2 IRS2 AQP3 FRAT1 FRAT2 GJA5 MYC SALL4 DPF1 CYP1B1 HOXA5 PRKCG KIRREL3 EPHA4 UNC5B OSR1 ARID5B CACNA2D4 POU3F1 MYT1 GEM EREG MFNG TXNIP ULK1 TRIM15 TAGLN3 FREM2 FLG SEMA7A PKDCC TSHZ1 STC1 GATA2 SPATA7 OTX1 PPARGC1A HOXC6 ABCA1 EGR1 FZD2 FZD4 PTCH1 HTR1D LRRN4 NR0B2 ARHGAP24 POU6F1 FOSL1 EFNA1 NR4A2 IGSF10 OCLM GJB2 TMIE BCL6 CTRL FGF19 CYP1A1 CALM2 SPRR1A SPRR1B CDKN1C GPSM1 CSRNPI CDKN1A BTG2 PTPRR GAL3ST1 CXCL8 CITED2 CHD6 SECTM1 FASLG PTPRJ SOBP GLI2 LFNG SPRED3 SIX5 ZNF488 EID2B SNTA1 EDN1 BAAT MUC5AC ITPKB TGFBR3 SLC7A5 ALDH1A3 MMP13 AHRR PDE5A RAPGEF5 IVL MDFI KDM7A HBEGF CHST3 SPRR3 CATSPER2 SRF RGS16 PTGS2 ADCY5 DLL4 ERBB3 SLITRK6 SH2B3 ATOH1 CDX2 WNT7B GAD1 GRHL3 CCK ACVR2B APLN GATM EPGN</i> |

|       |                                             |          |          |                 |                     |                                                                                                                                                                                                                                                                                                                                                                                                                                                                                                                                                                                                                                            |
|-------|---------------------------------------------|----------|----------|-----------------|---------------------|--------------------------------------------------------------------------------------------------------------------------------------------------------------------------------------------------------------------------------------------------------------------------------------------------------------------------------------------------------------------------------------------------------------------------------------------------------------------------------------------------------------------------------------------------------------------------------------------------------------------------------------------|
|       |                                             |          |          |                 |                     | <i>DHRS9 KRT17 NOVA1 FMOD</i>                                                                                                                                                                                                                                                                                                                                                                                                                                                                                                                                                                                                              |
| 8544  | epidermis development                       | 5.91E-05 | 5.50E-03 | 14/387 3.6%     | 186/17777<br>1.0%   | <i>FLG ERFFI1 SPRR3 PTCH1 GRHL3 PTGS2 POU3F1 GLI2<br/>EREG KRT17 TXNIP SPRR1A IVL SPRR1B</i>                                                                                                                                                                                                                                                                                                                                                                                                                                                                                                                                               |
| 30216 | keratinocyte differentiation                | 6.39E-05 | 5.78E-03 | 8/387 2.0%      | 63/17777<br>0.3%    | <i>FLG SPRR3 TXNIP POU3F1 SPRR1A IVL SPRR1B EREG</i>                                                                                                                                                                                                                                                                                                                                                                                                                                                                                                                                                                                       |
| 9991  | response to extracellular stimulus          | 7.48E-05 | 6.60E-03 | 17/387 4.3%     | 265/17777<br>1.4%   | <i>CDKN1A FZD4 WNT7B PTCH1 STC1 CCK PTGS2 SUOX<br/>AQP3 FOSL1 NR4A2 GATM NUA2 LIPG CYP1A1 AHRR<br/>PPARGC1A</i>                                                                                                                                                                                                                                                                                                                                                                                                                                                                                                                            |
| 30855 | epithelial cell differentiation             | 8.15E-05 | 7.01E-03 | 13/387 3.3%     | 168/17777<br>0.9%   | <i>FLG SPRR3 FZD2 WNT7B PTCH1 POU3F1 EREG DHRS9<br/>TXNIP SPRR1A HOXA5 IVL SPRR1B</i>                                                                                                                                                                                                                                                                                                                                                                                                                                                                                                                                                      |
| 31326 | regulation of cellular biosynthetic process | 8.54E-05 | 7.10E-03 | 95/387<br>24.5% | 3021/17777<br>16.9% | <i>CDKN1C ZNF512B CSRNP1 BTG2 CSF2 ZBTB24 CITED2<br/>CITED4 GUCA1B RORC HNF4G JADE1 CHD6 IRS2 AREG<br/>GLI2 NR3C2 AKAP12 SIX5 MYC SALL4 MYB DPF1 PDK4<br/>ANKRD1 ZNF488 ZNF565 ZNF763 HOXA5 EID2B TIGD3<br/>KDM6B ZNF362 EDN1 FOXD2 KMT5C MAMSTR ARID5B<br/>SOX12 BHLHA15 POU3F1 MYT1 GEM EREG KAT6B IRF2<br/>TXNIP AHRR MDFI KDM7A HBEGF ZNF233 ZNF552<br/>CREB5 ZNF792 ZNF395 SRF TSHZ1 ADCY4 KRBA2 GATA2<br/>PTGS2 ADCY5 FGD2 PDZD3 DNAJB5 BRD8 OTX1<br/>PPARGC1A ATOH1 HOXC6 ABCA1 EGR1 CDX2 SNAI3<br/>CBX2 ZBTB10 GRHL3 CCK NR0B2 ELL2 ACVR2B PNRC1<br/>POU6F1 FOSL1 NR4A2 SEPSECS BCL6 ZNF618 AGO4<br/>FGF19 JMY SP5 RHEBL1 MXD4</i> |
| 9636  | response to toxin                           | 8.95E-05 | 7.10E-03 | 8/387 2.0%      | 66/17777<br>0.3%    | <i>NR4A2 CDKN1A PDZD3 SRF HTR1D CYP1A1 AHRR<br/>SLC7A11</i>                                                                                                                                                                                                                                                                                                                                                                                                                                                                                                                                                                                |
| 7267  | cell-cell signaling                         | 9.33E-05 | 7.10E-03 | 28/387 7.2%     | 587/17777<br>3.3%   | <i>FLG VIPR1 GUCA1B TNC STC1 FASLG PTPRJ AREG<br/>EFNA4 GLI2 GJA5 TNFSF10 HOXA5 EDN1 FZD2 CCL20<br/>GDF15 WNT7B GAD1 HTR1D BHLHA15 ACVR2B EREG<br/>EFNA1 GJB2 EFNA3 NOVA1 ZYX</i>                                                                                                                                                                                                                                                                                                                                                                                                                                                          |

|       |                                                                 |          |          |              |                  |                                                                                                                                                                                                                                                                                                                                                                                                                                                                                                                                                                                            |
|-------|-----------------------------------------------------------------|----------|----------|--------------|------------------|--------------------------------------------------------------------------------------------------------------------------------------------------------------------------------------------------------------------------------------------------------------------------------------------------------------------------------------------------------------------------------------------------------------------------------------------------------------------------------------------------------------------------------------------------------------------------------------------|
| 18101 | peptidyl-citrulline biosynthetic process from peptidyl-arginine | 9.91E-05 | 7.10E-03 | 3/387 0.7%   | 5/17777 0.0%     | <i>PADI3 PADI2 PADI1</i>                                                                                                                                                                                                                                                                                                                                                                                                                                                                                                                                                                   |
| 42904 | 9-cis-retinoic acid biosynthetic process                        | 9.91E-05 | 7.10E-03 | 3/387 0.7%   | 5/17777 0.0%     | <i>DHRS9 CYP1A1 AHRR</i>                                                                                                                                                                                                                                                                                                                                                                                                                                                                                                                                                                   |
| 42905 | 9-cis-retinoic acid metabolic process                           | 9.91E-05 | 7.10E-03 | 3/387 0.7%   | 5/17777 0.0%     | <i>DHRS9 CYP1A1 AHRR</i>                                                                                                                                                                                                                                                                                                                                                                                                                                                                                                                                                                   |
| 35238 | vitamin A biosynthetic process                                  | 9.91E-05 | 7.10E-03 | 3/387 0.7%   | 5/17777 0.0%     | <i>DHRS9 CYP1A1 AHRR</i>                                                                                                                                                                                                                                                                                                                                                                                                                                                                                                                                                                   |
| 4668  | protein-arginine deiminase activity                             | 9.91E-05 | 7.10E-03 | 3/387 0.7%   | 5/17777 0.0%     | <i>PADI3 PADI2 PADI1</i>                                                                                                                                                                                                                                                                                                                                                                                                                                                                                                                                                                   |
| 7507  | heart development                                               | 1.05E-04 | 7.40E-03 | 15/387 3.8%  | 221/17777 1.2%   | <i>EDN1 CITED2 SRF OSR1 PTCH1 TNC PTPRJ ACVR2B POU6F1 GLI2 TGFBR3 ERBB3 GJA5 SALL4 FGF19</i>                                                                                                                                                                                                                                                                                                                                                                                                                                                                                               |
| 7423  | sensory organ development                                       | 1.08E-04 | 7.45E-03 | 16/387 4.1%  | 247/17777 1.3%   | <i>FLG EDN1 WNT7B TSHZ1 OSR1 FASLG SOBP GLI2 ALDH1A3 TMIE ERBB3 SIX5 CYP1A1 AHRR OTX1 ATOH1</i>                                                                                                                                                                                                                                                                                                                                                                                                                                                                                            |
| 9889  | regulation of biosynthetic process                              | 1.15E-04 | 7.76E-03 | 95/387 24.5% | 3045/17777 17.1% | <i>CDKN1C ZNF512B CSRNPI BTG2 CSF2 ZBTB24 CITED2 CITED4 GUCA1B RORC HNF4G JADE1 CHD6 IRS2 AREG GLI2 NR3C2 AKAP12 SIX5 MYC SALL4 MYB DPF1 PDK4 ANKRD1 ZNF488 ZNF565 ZNF763 HOXA5 EID2B TIGD3 KDM6B ZNF362 EDN1 FOXD2 KMT5C MAMSTR ARID5B SOX12 BHLHA15 POU3F1 MYT1 GEM EREG KAT6B IRF2 TXNIP AHRR MDFI KDM7A HBEGF ZNF233 ZNF552 CREB5 ZNF792 ZNF395 SRF TSHZ1 ADCY4 KRBA2 GATA2 PTGS2 ADCY5 FGD2 PDZD3 DNAJB5 BRD8 OTX1 PPARGC1A ATOH1 HOXC6 ABCA1 EGR1 CDX2 SNAI3 CBX2 ZBTB10 GRHL3 CCK NR0B2 ELL2 ACVR2B PNRC1 POU6F1 FOSL1 NR4A2 SEPSECS BCL6 ZNF618 AGO4 FGF19 JMY SP5 RHEBL1 MXD4</i> |

|       |                                 |         |          |          |                 |                     |                                                                                                                                                                                                                                                                                                                                                                                                                                                          |
|-------|---------------------------------|---------|----------|----------|-----------------|---------------------|----------------------------------------------------------------------------------------------------------------------------------------------------------------------------------------------------------------------------------------------------------------------------------------------------------------------------------------------------------------------------------------------------------------------------------------------------------|
| 43687 | post-translational modification | protein | 1.20E-04 | 7.95E-03 | 48/387<br>12.4% | 1266/17777<br>7.1%  | <i>FLG OTUB2 CDKN1A BTG2 PTPRR PKDCC TXK JADE1 TESK2 TNFAIP3 PTPRJ PPM1K GNA14 NUA2 ERBB3 PDK4 BRD8 JAK3 PRKCG KDM6B DUSP5 EPHA4 MAP3K3 CDKL5 KMT5C GAD1 OSR1 MAMDC2 CCK MYT1 ACVR2B EFNA1 TGFB3 RNF144B MEX3B EPGN KAT6B LNX1 ULK1 PTPN7 SPRR1A PDZRN3 IVL MDFI FRK SPRR1B FGFR2 KDM7A</i>                                                                                                                                                              |
| 23046 | signaling process               |         | 1.30E-04 | 8.31E-03 | 72/387<br>18.6% | 2156/17777<br>12.1% | <i>GPSM1 CDKN1A VIPR1 GAL3ST1 CXCL8 GUCA1B TNC IRS2 FASLG CBLB NR3C2 AKAP12 SPRED3 ARHGAP42 PDK4 TNFSF10 ANKRD1 JAK3 EPHA4 EDN1 UNC5B STARD8 OSR1 BHLHA15 POU3F1 MTSSI GEM EREG ITPKB ARL4C TGFB3 ULK1 PDE5A RAPGEF5 MDFI HBEGF PTGES FLG CD274 GRB7 INPP1 TXK ADCY4 RHOTB1 ADCY5 DLL4 GNA14 PDZD3 ERBB3 BRD8 ABCA1 MAP3K3 FZD2 CCL20 GDF15 GAD1 PTCH1 HTR1D CCK ACVR2B ARHGAP24 APLN EFNA1 NR4A2 EPGN ARHGAP31 DLG2 NOVA1 GKAP1 ZYX RHEBL1 HIST1H4D</i> |
| 23060 | signal transmission             |         | 1.30E-04 | 8.31E-03 | 72/387<br>18.6% | 2156/17777<br>12.1% | <i>GPSM1 CDKN1A VIPR1 GAL3ST1 CXCL8 GUCA1B TNC IRS2 FASLG CBLB NR3C2 AKAP12 SPRED3 ARHGAP42 PDK4 TNFSF10 ANKRD1 JAK3 EPHA4 EDN1 UNC5B STARD8 OSR1 BHLHA15 POU3F1 MTSSI GEM EREG ITPKB ARL4C TGFB3 ULK1 PDE5A RAPGEF5 MDFI HBEGF PTGES FLG CD274 GRB7 INPP1 TXK ADCY4 RHOTB1 ADCY5 DLL4 GNA14 PDZD3 ERBB3 BRD8 ABCA1 MAP3K3 FZD2 CCL20 GDF15 GAD1 PTCH1 HTR1D CCK ACVR2B ARHGAP24 APLN EFNA1 NR4A2 EPGN ARHGAP31 DLG2 NOVA1 GKAP1 ZYX RHEBL1 HIST1H4D</i> |
| 48468 | cell development                |         | 1.37E-04 | 8.57E-03 | 29/387 7.4%     | 632/17777<br>3.5%   | <i>FLG CDKN1C SRF TNC FASLG GATA2 GLI2 ERBB3 SIX5 SLITRK6 ZNF488 HOXA5 ATOH1 SNTA1 EPHA4 EDN1 CDX2 UNC5B WNT7B CCK BHLHA15 POU3F1 EREG NR4A2 TGFB3 BCL6 FGF19 ULK1 CHST3</i>                                                                                                                                                                                                                                                                             |

|       |                                                                   |          |          |                 |                     |                                                                                                                                                                                                                                                                                                                                                                                                                                                                                                                                                                                                                                  |
|-------|-------------------------------------------------------------------|----------|----------|-----------------|---------------------|----------------------------------------------------------------------------------------------------------------------------------------------------------------------------------------------------------------------------------------------------------------------------------------------------------------------------------------------------------------------------------------------------------------------------------------------------------------------------------------------------------------------------------------------------------------------------------------------------------------------------------|
| 7398  | ectoderm development                                              | 1.43E-04 | 8.78E-03 | 14/387 3.6%     | 202/17777<br>1.1%   | <i>FLG ERRFII SPRR3 PTCH1 GRHL3 PTGS2 POU3F1 GLI2<br/>EREG KRT17 TXNIP SPRR1A IVL SPRR1B</i>                                                                                                                                                                                                                                                                                                                                                                                                                                                                                                                                     |
| 40007 | growth                                                            | 1.94E-04 | 1.14E-02 | 14/387 3.6%     | 208/17777<br>1.1%   | <i>FLG WNT7B SERPINE1 ARID5B PTGS2 ACVR2B GLI2<br/>EREG TGFB3 IGSF10 GATM ULK1 HOXA5 FGFR2</i>                                                                                                                                                                                                                                                                                                                                                                                                                                                                                                                                   |
| 42362 | fat-soluble vitamin<br>biosynthetic process                       | 1.95E-04 | 1.14E-02 | 3/387 0.7%      | 6/17777 0.0%        | <i>DHRS9 CYP11A1 AHRR</i>                                                                                                                                                                                                                                                                                                                                                                                                                                                                                                                                                                                                        |
| 19240 | citrulline biosynthetic process                                   | 1.95E-04 | 1.14E-02 | 3/387 0.7%      | 6/17777 0.0%        | <i>PADI3 PADI2 PADI1</i>                                                                                                                                                                                                                                                                                                                                                                                                                                                                                                                                                                                                         |
| 6357  | regulation of transcription<br>from RNA polymerase II<br>promoter | 2.18E-04 | 1.24E-02 | 32/387 8.2%     | 747/17777<br>4.2%   | <i>CDKN1C CSRNP1 CITED2 SRF HNF4G GATA2 GLI2<br/>DNAJB5 MYC SALL4 ANKRD1 BRD8 OTX1 PPARGC1A<br/>HOXA5 ATOH1 HOXC6 KDM6B EGR1 CDX2 CBX2 SOX12<br/>BHLHA15 NR0B2 FOSL1 NR4A2 BCL6 JMY IRF2 TXNIP<br/>MDF1 MXD4</i>                                                                                                                                                                                                                                                                                                                                                                                                                 |
| 42127 | regulation of cell proliferation                                  | 2.19E-04 | 1.24E-02 | 35/387 9.0%     | 847/17777<br>4.7%   | <i>FLG CDKN1C CD274 CDKN1A BTG2 VIPR1 CSF2 CXCL8<br/>SERPINE1 IRS2 FASLG CBLB PTGS2 GLI2 ERBB3 SIX5<br/>MYC SESN1 HOXA5 EDN1 PTCH1 DLEC1 CCK EREG<br/>FOSL1 TGFB3 EPGN BCL6 FGF19 TXNIP FRK FGFR2<br/>PTGES MXD4 BNIPL</i>                                                                                                                                                                                                                                                                                                                                                                                                       |
| 51171 | regulation of nitrogen<br>compound metabolic process              | 2.78E-04 | 1.54E-02 | 93/387<br>24.0% | 3039/17777<br>17.0% | <i>CDKN1C ZNF512B CSRNP1 BTG2 CSF2 ZBTB24 CITED2<br/>CITED4 GUCA1B TNC RORC HNF4G JADE1 CHD6 AREG<br/>GLI2 NR3C2 AKAP12 SIX5 MYC SALL4 MYB DPF1<br/>ANKRD1 ZNF488 ZNF565 ZNF763 HOXA5 EID2B AGFG2<br/>PRKCG TIGD3 KDM6B ZNF362 EDN1 FOXD2 KMT5C<br/>MAMSTR ARID5B SOX12 BHLHA15 TNFRSF1B POU3F1<br/>MYT1 GEM EREG KAT6B IRF2 TXNIP AHRR MDF1 KDM7A<br/>ZNF233 ZNF552 CREB5 ZNF792 ZNF395 SRF TSHZ1<br/>ADCY4 KRBA2 GATA2 PTGS2 ADCY5 FGD2 PDZD3<br/>DNAJB5 BRD8 OTX1 PPARGC1A ATOH1 HOXC6 ABCA1<br/>EGR1 CDX2 SNAI3 CBX2 ZBTB10 GRHL3 CCK NR0B2<br/>ELL2 ACVR2B PNRC1 POU6F1 FOSL1 NR4A2 BCL6<br/>ZNF618 JMY SP5 RHEBL1 MXD4</i> |

|       |                                                                                     |          |          |                  |                     |                                                                                                                                                                                                                                                                                                                                                                                                                                                                                                                                                                                                                                                                                                          |
|-------|-------------------------------------------------------------------------------------|----------|----------|------------------|---------------------|----------------------------------------------------------------------------------------------------------------------------------------------------------------------------------------------------------------------------------------------------------------------------------------------------------------------------------------------------------------------------------------------------------------------------------------------------------------------------------------------------------------------------------------------------------------------------------------------------------------------------------------------------------------------------------------------------------|
| 19219 | regulation of nucleobase, nucleoside, nucleotide and nucleic acid metabolic process | 3.27E-04 | 1.79E-02 | 92/387<br>23.7%  | 3013/17777<br>16.9% | CDKN1C ZNF512B CSRNPI BTG2 CSF2 ZBTB24 CITED2 CITED4 GUCA1B TNC RORC HNF4G JADE1 CHD6 AREG GLI2 NR3C2 AKAP12 SIX5 MYC SALL4 MYB DPF1 ANKRD1 ZNF488 ZNF565 ZNF763 HOXA5 EID2B AGFG2 PRKCG TIGD3 KDM6B ZNF362 EDN1 FOXD2 KMT5C MAMSTR ARID5B SOX12 BHLHA15 TNFRSF1B POU3F1 MYT1 GEM EREG KAT6B IRF2 TXNIP AHRR MDFI KDM7A ZNF233 ZNF552 CREB5 ZNF792 ZNF395 SRF TSHZ1 ADCY4 KRBA2 GATA2 ADCY5 FGD2 PDZD3 DNAJB5 BRD8 OTX1 PPARGC1A ATOH1 HOXC6 ABCA1 EGR1 CDX2 SNAI3 CBX2 ZBTB10 GRHL3 CCK NR0B2 ELL2 ACVR2B PNRC1 POU6F1 FOSL1 NR4A2 BCL6 ZNF618 JMY SP5 RHEBL1 MXD4                                                                                                                                      |
| 52    | citruiline metabolic process                                                        | 3.36E-04 | 1.81E-02 | 3/387 0.7%       | 7/17777 0.0%        | PADI3 PADI2 PADI1                                                                                                                                                                                                                                                                                                                                                                                                                                                                                                                                                                                                                                                                                        |
| 19222 | regulation of metabolic process                                                     | 3.41E-04 | 1.81E-02 | 114/387<br>29.4% | 3916/17777<br>22.0% | ERRFI1 CSF2 ZBTB24 SERPINE1 GUCA1B TNC RORC JADE1 IRS2 CBLB NR3C2 MYC SALL4 MYB LIPG DPF1 PDK4 ZNF565 HOXA5 AGFG2 PRKCG KMT5C MAMSTR OSR1 ARID5B SOX12 BHLHA15 POU3F1 MYT1 CPT1B GEM EREG KAT6B TXNIP ULK1 ZNF552 FLG ZNF792 ZNF395 TSHZ1 KRBA2 GATA2 PDZD3 OTX1 PPARGC1A HOXC6 ABCA1 EGR1 SNAI3 CBX2 ZBTB10 NR0B2 ELL2 POU6F1 FOSL1 EFNA1 NR4A2 SEPSECS BCL6 AGO4 FGF19 CCDC88C JMY SP5 MXD4 CDKN1C ZNF512B CSRNPI CDKN1A BTG2 CITED2 CITED4 HNF4G CHD6 AREG GLI2 AKAP12 SPRED3 H2AFJ SIX5 ANKRD1 ZNF488 ZNF763 EID2B TIGD3 KDM6B ZNF362 EDN1 FOXD2 TNFRSF1B CNKSR3 IRF2 AHRR MDFI KDM7A HBEGF ZNF233 CREB5 SRF ADCY4 PTGS2 ADCY5 FGD2 DNAJB5 BRD8 ATOH1 CDX2 GRHL3 CCK ACVR2B PNRC1 EPGN ZNF618 RHEBL1 |
| 43583 | ear development                                                                     | 3.58E-04 | 1.84E-02 | 9/387 2.3%       | 101/17777<br>0.5%   | FLG TMIE EDN1 TSHZ1 OSR1 OTX1 SOBP ATOH1 GLI2                                                                                                                                                                                                                                                                                                                                                                                                                                                                                                                                                                                                                                                            |
| 90068 | positive regulation of cell cycle process                                           | 3.59E-04 | 1.84E-02 | 6/387 1.5%       | 44/17777<br>0.2%    | CDKN1A EDN1 EPGN CYP11A1 AHRR EREG                                                                                                                                                                                                                                                                                                                                                                                                                                                                                                                                                                                                                                                                       |



|       |                                          |          |          |               |                  |                                                                                                                                                                                                                                                                                                                                                                                                                                                                                                                                                                                                                                                                                   |
|-------|------------------------------------------|----------|----------|---------------|------------------|-----------------------------------------------------------------------------------------------------------------------------------------------------------------------------------------------------------------------------------------------------------------------------------------------------------------------------------------------------------------------------------------------------------------------------------------------------------------------------------------------------------------------------------------------------------------------------------------------------------------------------------------------------------------------------------|
| 9966  | regulation of signal transduction        | 3.96E-04 | 2.01E-02 | 32/387 8.2%   | 773/17777 4.3%   | <i>FLG ERRF1 CSF2 RGS16 SERPINE1 SECTM1 TNFAIP3 FASLG KNDC1 FGD2 AKAP12 SPRED3 ERBB3 RASGEF1B TNFSF10 GPAT3 FBXO8 AGFG2 MAP3K3 EDN1 CCK EREG ITPKB EFNA1 EPGN BCL6 FGF19 DDIT4 CNKSR3 RAPGEF5 MDFI HBEGF</i>                                                                                                                                                                                                                                                                                                                                                                                                                                                                      |
| 1523  | retinoid metabolic process               | 4.34E-04 | 2.03E-02 | 5/387 1.2%    | 30/17777 0.1%    | <i>ALDH1A3 DHRS9 CYP1A1 AHRR BCO2</i>                                                                                                                                                                                                                                                                                                                                                                                                                                                                                                                                                                                                                                             |
| 6776  | vitamin A metabolic process              | 4.34E-04 | 2.03E-02 | 5/387 1.2%    | 30/17777 0.1%    | <i>ALDH1A3 DHRS9 CYP1A1 AHRR BCO2</i>                                                                                                                                                                                                                                                                                                                                                                                                                                                                                                                                                                                                                                             |
| 16101 | diterpenoid metabolic process            | 4.34E-04 | 2.03E-02 | 5/387 1.2%    | 30/17777 0.1%    | <i>ALDH1A3 DHRS9 CYP1A1 AHRR BCO2</i>                                                                                                                                                                                                                                                                                                                                                                                                                                                                                                                                                                                                                                             |
| 31323 | regulation of cellular metabolic process | 4.37E-04 | 2.03E-02 | 109/387 28.1% | 3733/17777 20.9% | <i>ERRF1 CSF2 ZBTB24 GUCA1B TNC RORC JADE1 IRS2 NR3C2 MYC SALL4 MYB LIPG DPF1 PDK4 ZNF565 HOXA5 AGFG2 PRKCG KMT5C MAMSTR ARID5B SOX12 BHLHA15 POU3F1 MYT1 CPT1B GEM EREG KAT6B TXNIP ULK1 ZNF552 ZNF792 ZNF395 TSHZ1 KRBA2 GATA2 PDZD3 OTX1 PPARGC1A HOXC6 ABCA1 EGR1 SNAI3 CBX2 ZBTB10 NR0B2 ELL2 POU6F1 FOSL1 EFNA1 NR4A2 SEPSECS BCL6 AGO4 FGF19 CCDC88C JMY SP5 MXD4 CDKN1C ZNF512B CSRNP1 CDKN1A BTG2 CITED2 CITED4 HNF4G CHD6 AREG GLI2 AKAP12 SPRED3 SIX5 ANKRD1 ZNF488 ZNF763 EID2B TIGD3 KDM6B ZNF362 EDN1 FOXD2 TNFRSF1B CNKSR3 IRF2 AHRR MDFI KDM7A HBEGF ZNF233 CREB5 SRF ADCY4 PTGS2 ADCY5 FGD2 DNAJB5 BRD8 ATOH1 CDX2 GRHL3 CCK ACVR2B PNRC1 EPGN ZNF618 RHEBL1</i> |
| 23051 | regulation of signaling process          | 4.43E-04 | 2.03E-02 | 32/387 8.2%   | 778/17777 4.3%   | <i>FLG ERRF1 CSF2 RGS16 SERPINE1 SECTM1 TNFAIP3 FASLG KNDC1 FGD2 AKAP12 SPRED3 ERBB3 RASGEF1B TNFSF10 GPAT3 FBXO8 AGFG2 MAP3K3 EDN1 CCK EREG ITPKB EFNA1 EPGN BCL6 FGF19 DDIT4 CNKSR3 RAPGEF5 MDFI HBEGF</i>                                                                                                                                                                                                                                                                                                                                                                                                                                                                      |

|       |                                       |          |          |              |                 |                                                                                                                                                                                                                                                                                                                 |
|-------|---------------------------------------|----------|----------|--------------|-----------------|-----------------------------------------------------------------------------------------------------------------------------------------------------------------------------------------------------------------------------------------------------------------------------------------------------------------|
| 16711 | flavonoid 3'-monooxygenase activity   | 4.73E-04 | 2.03E-02 | 2/387 0.5%   | 2/17777 0.0%    | <i>CYP1A1 AHRR</i>                                                                                                                                                                                                                                                                                              |
| 17143 | insecticide metabolic process         | 4.73E-04 | 2.03E-02 | 2/387 0.5%   | 2/17777 0.0%    | <i>CYP1A1 AHRR</i>                                                                                                                                                                                                                                                                                              |
| 9635  | response to herbicide                 | 4.73E-04 | 2.03E-02 | 2/387 0.5%   | 2/17777 0.0%    | <i>CYP1A1 AHRR</i>                                                                                                                                                                                                                                                                                              |
| 19341 | dibenzo-p-dioxin catabolic process    | 4.73E-04 | 2.03E-02 | 2/387 0.5%   | 2/17777 0.0%    | <i>CYP1A1 AHRR</i>                                                                                                                                                                                                                                                                                              |
| 60482 | lobar bronchus development            | 4.73E-04 | 2.03E-02 | 2/387 0.5%   | 2/17777 0.0%    | <i>WNT7B HOXA5</i>                                                                                                                                                                                                                                                                                              |
| 60535 | trachea morphogenesis cartilage       | 4.73E-04 | 2.03E-02 | 2/387 0.5%   | 2/17777 0.0%    | <i>WNT7B HOXA5</i>                                                                                                                                                                                                                                                                                              |
| 60536 | cartilage morphogenesis               | 4.73E-04 | 2.03E-02 | 2/387 0.5%   | 2/17777 0.0%    | <i>WNT7B HOXA5</i>                                                                                                                                                                                                                                                                                              |
| 9404  | toxin metabolic process               | 5.29E-04 | 2.22E-02 | 3/387 0.7%   | 8/17777 0.0%    | <i>CYP1A1 CYP1B1 AHRR</i>                                                                                                                                                                                                                                                                                       |
| 60638 | mesenchymal-epithelial cell signaling | 5.29E-04 | 2.22E-02 | 3/387 0.7%   | 8/17777 0.0%    | <i>FLG TNC HOXA5</i>                                                                                                                                                                                                                                                                                            |
| 42221 | response to chemical stimulus         | 5.72E-04 | 2.37E-02 | 51/387 13.1% | 1466/17777 8.2% | <i>CDKN1A BTG2 CXCL8 CITED2 SERPINE1 TNC IRS2 FASLG SLC7A11 AQP3 CXCL2 MYC LIPG CYP1B1 PRSS8 CHAC1 PDIA2 EDN1 OSR1 EREG TGFB3 ALDH1A3 DDIT4 TXNIP AHRR PDE5A SRF ADCY4 STC1 PTGS2 NDRG1 ADCY5 PDZD3 ERBB3 DNAJB5 EGR1 FZD4 CCL20 WNT7B PTCH1 HTR1D CCK SUOX NR0B2 ACVR2B FOSL1 NR4A2 GATM VNN1 CYP1A1 CALM2</i> |
| 7050  | cell cycle arrest                     | 5.87E-04 | 2.41E-02 | 9/387 2.3%   | 108/17777 0.6%  | <i>CDKN1C CDKN1A CXCL8 SESN3 MYC SESN1 TP53INP1 JMY HBP1</i>                                                                                                                                                                                                                                                    |
| 34754 | cellular hormone metabolic process    | 6.21E-04 | 2.51E-02 | 7/387 1.8%   | 67/17777 0.3%   | <i>ALDH1A3 DHRS9 HSD3B1 CYP1A1 CYP1B1 AHRR BCO2</i>                                                                                                                                                                                                                                                             |

|       |                                              |          |          |               |                  |                                                                                                                                                                                                                                                                                                                                                                                                                                                                                                                                                       |
|-------|----------------------------------------------|----------|----------|---------------|------------------|-------------------------------------------------------------------------------------------------------------------------------------------------------------------------------------------------------------------------------------------------------------------------------------------------------------------------------------------------------------------------------------------------------------------------------------------------------------------------------------------------------------------------------------------------------|
| 51094 | positive regulation of developmental process | 6.36E-04 | 2.54E-02 | 18/387 4.6%   | 347/17777 1.9%   | <i>FLG CSF2 PKDCC CDX2 WNT7B SRF SERPINE1 CCK GATA2 PTGS2 ACVR2B GLI2 ITPKB VNN1 MYC ZNF488 HOXA5 ATOH1</i>                                                                                                                                                                                                                                                                                                                                                                                                                                           |
| 35466 | regulation of signaling pathway              | 6.44E-04 | 2.55E-02 | 38/387 9.8%   | 1003/17777 5.6%  | <i>FLG CDKN1C GPSM1 ERRF11 CSF2 CITED2 RGS16 SECTM1 TNFAIP3 FASLG CBLB KNDC1 GLI2 FGD2 AKAP12 SPRED3 ERBB3 RASGEF1B TNFSF10 GPAT3 FBXO8 AGFG2 MAP3K3 EDN1 PTCH1 CCK ACVR2B EREG ITPKB EFNA1 EPGN BCL6 FGF19 CNKSR3 ULK1 RAPGEF5 MDFI HBEGF</i>                                                                                                                                                                                                                                                                                                        |
| 8285  | negative regulation of cell proliferation    | 6.86E-04 | 2.68E-02 | 19/387 4.9%   | 379/17777 2.1%   | <i>CDKN1C CD274 CDKN1A BTG2 CXCL8 PTCH1 CBLB DLEC1 PTGS2 EREG FOSL1 TGFBR3 BCL6 SIX5 SESN1 FRK PTGES MXD4 BNIPL</i>                                                                                                                                                                                                                                                                                                                                                                                                                                   |
| 3002  | regionalization                              | 7.54E-04 | 2.91E-02 | 13/387 3.3%   | 211/17777 1.1%   | <i>BTG2 EDN1 CDX2 WNT7B TSHZ1 PTCH1 ACVR2B GLI2 LFNG OTX1 HOXA5 MDFI HOXC6</i>                                                                                                                                                                                                                                                                                                                                                                                                                                                                        |
| 17085 | response to insecticide                      | 7.80E-04 | 2.94E-02 | 3/387 0.7%    | 9/17777 0.0%     | <i>NR4A2 CYP1A1 AHRR</i>                                                                                                                                                                                                                                                                                                                                                                                                                                                                                                                              |
| 18195 | peptidyl-arginine modification               | 7.80E-04 | 2.94E-02 | 3/387 0.7%    | 9/17777 0.0%     | <i>PADI3 PADI2 PADI1</i>                                                                                                                                                                                                                                                                                                                                                                                                                                                                                                                              |
| 10035 | response to inorganic substance              | 7.86E-04 | 2.94E-02 | 14/387 3.6%   | 239/17777 1.3%   | <i>CDKN1A PTCH1 SERPINE1 TNC PTGS2 AQP3 NDRG1 FOSL1 NR4A2 GATM CYP1A1 TXNIP AHRR CALM2</i>                                                                                                                                                                                                                                                                                                                                                                                                                                                            |
| 80090 | regulation of primary metabolic process      | 8.58E-04 | 3.18E-02 | 103/387 26.6% | 3552/17777 19.9% | <i>ERRF11 CSF2 ZBTB24 SERPINE1 GUCA1B TNC RORC JADE1 IRS2 CBLB NR3C2 MYC SALL4 MYB DPF1 ZNF565 HOXA5 AGFG2 PRKCG KMT5C MAMSTR ARID5B SOX12 BHLHA15 POU3F1 MYT1 CPT1B GEM EREG KAT6B TXNIP ZNF552 ZNF792 ZNF395 TSHZ1 KRBA2 GATA2 PDZD3 OTX1 PPARGC1A HOXC6 ABCA1 EGR1 SNAI3 CBX2 ZBTB10 NR0B2 ELL2 POU6F1 FOSL1 NR4A2 SEPSECS BCL6 AGO4 FGF19 CCDC88C JMY SP5 MXD4 CDKN1C ZNF512B CSRNPI BTG2 CITED2 CITED4 HNF4G CHD6 AREG GLI2 AKAP12 SIX5 ANKRD1 ZNF488 ZNF763 EID2B TIGD3 KDM6B ZNF362 EDN1 FOXD2 TNFRSF1B CNKSR3 IRF2 AHRR MDFI KDM7A ZNF233</i> |

|       |                                            |          |          |              |                  |  |                                                                                                                                                                                                                                                                                                                                                                                                           |
|-------|--------------------------------------------|----------|----------|--------------|------------------|--|-----------------------------------------------------------------------------------------------------------------------------------------------------------------------------------------------------------------------------------------------------------------------------------------------------------------------------------------------------------------------------------------------------------|
|       |                                            |          |          |              |                  |  | <i>CREB5 SRF ADCY4 PTGS2 ADCY5 FGD2 DNAJB5 BRD8 ATOH1 CDX2 GRHL3 CCK ACVR2B PNRC1 ZNF618 RHEBL1</i>                                                                                                                                                                                                                                                                                                       |
| 45787 | positive regulation of cell cycle          | 8.81E-04 | 3.23E-02 | 7/387 1.8%   | 71/17777 0.3%    |  | <i>FOSL1 EDN1 EPGN CITED2 CYP1A1 AHRR EREG</i>                                                                                                                                                                                                                                                                                                                                                            |
| 4879  | ligand-dependent nuclear receptor activity | 8.95E-04 | 3.24E-02 | 6/387 1.5%   | 52/17777 0.2%    |  | <i>NR4A2 RORC HNF4G BRD8 NR0B2 NR3C2</i>                                                                                                                                                                                                                                                                                                                                                                  |
| 4713  | protein tyrosine kinase activity           | 9.41E-04 | 3.37E-02 | 10/387 2.5%  | 139/17777 0.7%   |  | <i>FLG EPHA4 EFNA3 ERBB3 TXK TESK2 JAK3 EFNA4 FRK FGFR2</i>                                                                                                                                                                                                                                                                                                                                               |
| 31667 | response to nutrient levels                | 9.61E-04 | 3.41E-02 | 14/387 3.6%  | 244/17777 1.3%   |  | <i>FZD4 WNT7B PTCH1 STC1 CCK PTGS2 SUOX AQP3 GATM NUA2 LIPG CYP1A1 AHRR PPARGC1A</i>                                                                                                                                                                                                                                                                                                                      |
| 10469 | regulation of receptor activity            | 9.87E-04 | 3.44E-02 | 4/387 1.0%   | 21/17777 0.1%    |  | <i>ERRF1 EPGN SERPINE1 EREG</i>                                                                                                                                                                                                                                                                                                                                                                           |
| 42472 | inner ear morphogenesis                    | 9.91E-04 | 3.44E-02 | 6/387 1.5%   | 53/17777 0.2%    |  | <i>FLG TMIE OTX1 SOBP ATOH1 GLI2</i>                                                                                                                                                                                                                                                                                                                                                                      |
| 48729 | tissue morphogenesis                       | 1.03E-03 | 3.55E-02 | 15/387 3.8%  | 274/17777 1.5%   |  | <i>FLG ERRF1 EDN1 WNT7B SRF OSR1 PTCH1 TNC GLI2 TGFR3 ALDH1A3 MYC TRIM15 HOXA5 FREM2</i>                                                                                                                                                                                                                                                                                                                  |
| 48522 | positive regulation of cellular process    | 1.05E-03 | 3.57E-02 | 64/387 16.5% | 2003/17777 11.2% |  | <i>CDKN1C CSRNPI CDKN1A VIPR1 CSF2 CITED2 SERPINE1 CITED4 SECTM1 IRS2 FASLG AREG GLI2 AKAP12 MYC SALL4 DPF1 TNFSF10 ZNF488 PHLDA1 HOXA5 PRKCG EDN1 BHLHA15 EREG ITPKB ALDH1A3 KAT6B TXNIP AHRR PDE5A HBEGF CHST3 CREB5 FLG PKDCC SRF GATA2 PTGS2 FGD2 ERBB3 TP53INP1 PPARGC1A ATOH1 ABCA1 EGR1 MAP3K3 CDX2 WNT7B CIDEA GRHL3 CCK NR0B2 ACVR2B FOSL1 NR4A2 EPGN VNN1 BCL6 FGF19 JMY CYP1A1 FGFR2 BNIPL</i> |
| 46685 | response to arsenic                        | 1.10E-03 | 3.68E-02 | 3/387 0.7%   | 10/17777 0.0%    |  | <i>CDKN1A CYP1A1 AHRR</i>                                                                                                                                                                                                                                                                                                                                                                                 |

|       |                                    |          |          |                 |                     |                                                                                                                                                                                                                                                                                                                                                                                                                                                                                                                                                    |
|-------|------------------------------------|----------|----------|-----------------|---------------------|----------------------------------------------------------------------------------------------------------------------------------------------------------------------------------------------------------------------------------------------------------------------------------------------------------------------------------------------------------------------------------------------------------------------------------------------------------------------------------------------------------------------------------------------------|
| 48732 | gland development                  | 1.10E-03 | 3.68E-02 | 12/387 3.1%     | 193/17777<br>1.0%   | <i>FLG ALDH1A3 ERBB3 CITED2 WNT7B PTCH1 TNC IRS2 GATA2 HOXA5 GLI2 APLN</i>                                                                                                                                                                                                                                                                                                                                                                                                                                                                         |
| 45595 | regulation of cell differentiation | 1.11E-03 | 3.68E-02 | 24/387 6.2%     | 553/17777<br>3.1%   | <i>FLG ABCA1 ERFF1 EDN1 CSF2 PKDCC CDX2 WNT7B SRF OSR1 CCK AQP3 ACVR2B GLI2 EREG ITPKB EFNA1 VNN1 BCL6 ULK1 ZNF488 HIST1H4D HOXA5 ATOH1</i>                                                                                                                                                                                                                                                                                                                                                                                                        |
| 10468 | regulation of gene expression      | 1.18E-03 | 3.88E-02 | 87/387<br>22.4% | 2928/17777<br>16.4% | <i>CDKN1C ZNF512B CSRNPI BTG2 CSF2 ZBTB24 CITED2 SERPINE1 CITED4 RORC HNF4G JADE1 CHD6 GLI2 NR3C2 H2AFJ SIX5 MYC SALL4 MYB DPF1 ANKRD1 ZNF488 ZNF565 ZNF763 HOXA5 EID2B TIGD3 KDM6B ZNF362 FOXD2 KMT5C MAMSTR OSR1 ARID5B SOX12 BHLHA15 TNFRSF1B POU3F1 MYT1 GEM EREG KAT6B IRF2 TXNIP AHRR MDFI KDM7A ZNF233 ZNF552 CREB5 FLG ZNF792 ZNF395 SRF TSHZ1 KRBA2 GATA2 DNAJB5 BRD8 OTX1 PPARGC1A ATOH1 HOXC6 EGR1 CDX2 SNAI3 CBX2 ZBTB10 GRHL3 CCK NR0B2 ELL2 ACVR2B PNRC1 POU6F1 FOSL1 NR4A2 SEPSECS BCL6 ZNF618 AGO4 CCDC88C JMY SP5 RHEBL1 MXD4</i> |
| 48565 | digestive tract development        | 1.21E-03 | 3.90E-02 | 6/387 1.5%      | 55/17777<br>0.3%    | <i>PKDCC CYP1A1 AHRR ACVR2B HOXA5 GLI2</i>                                                                                                                                                                                                                                                                                                                                                                                                                                                                                                         |
| 7584  | response to nutrient               | 1.21E-03 | 3.90E-02 | 11/387 2.8%     | 169/17777<br>0.9%   | <i>GATM FZD4 WNT7B PTCH1 LIPG CYP1A1 AHRR STC1 PTGS2 SUOXAQP3</i>                                                                                                                                                                                                                                                                                                                                                                                                                                                                                  |
| 48469 | cell maturation                    | 1.32E-03 | 4.08E-02 | 7/387 1.8%      | 76/17777<br>0.4%    | <i>FLG CDKN1C NR4A2 BHLHA15 GATA2 HOXA5 EREG</i>                                                                                                                                                                                                                                                                                                                                                                                                                                                                                                   |
| 6721  | terpenoid metabolic process        | 1.32E-03 | 4.08E-02 | 5/387 1.2%      | 38/17777<br>0.2%    | <i>ALDH1A3 DHRS9 CYP1A1 AHRR BCO2</i>                                                                                                                                                                                                                                                                                                                                                                                                                                                                                                              |
| 21700 | developmental maturation           | 1.34E-03 | 4.08E-02 | 8/387 2.0%      | 98/17777<br>0.5%    | <i>FLG CDKN1C NR4A2 BHLHA15 GATA2 PTGS2 HOXA5 EREG</i>                                                                                                                                                                                                                                                                                                                                                                                                                                                                                             |

|       |                                                                                           |          |          |                 |                    |                                                                                                                                                                                                                                                                                  |
|-------|-------------------------------------------------------------------------------------------|----------|----------|-----------------|--------------------|----------------------------------------------------------------------------------------------------------------------------------------------------------------------------------------------------------------------------------------------------------------------------------|
| 7399  | nervous system development                                                                | 1.39E-03 | 4.08E-02 | 41/387<br>10.5% | 1155/17777<br>6.4% | <i>FLG CDKN1C GPSM1 BTG2 SEMA7A PTPRR GAL3ST1<br/>CITED2 SRF CHD6 IRS2 GATA2 GLI2 ERBB3 DPF1<br/>SLITRK6 OTX1 ZNF488 ATOH1 EPHA4 FZD2 UNC5B FZD4<br/>WNT7B PTCH1 LRRN4 CCK POU3F1 MYT1 POU6F1<br/>EFNA1 NR4A2 SLC7A5 ALDH1A3 FGF19 ULK1 PDE5A<br/>TAGLN3 RAPGEF5 KDM7A CHST3</i> |
| 33829 | O-fucosylpeptide 3-beta-N-acetylglucosaminyltransferase activity                          | 1.40E-03 | 4.08E-02 | 2/387 0.5%      | 3/17777 0.0%       | <i>LFNG MFNG</i>                                                                                                                                                                                                                                                                 |
| 42178 | xenobiotic catabolic process                                                              | 1.40E-03 | 4.08E-02 | 2/387 0.5%      | 3/17777 0.0%       | <i>CYP1A1 AHRR</i>                                                                                                                                                                                                                                                               |
| 10041 | response to iron(III) ion                                                                 | 1.40E-03 | 4.08E-02 | 2/387 0.5%      | 3/17777 0.0%       | <i>CYP1A1 AHRR</i>                                                                                                                                                                                                                                                               |
| 18894 | dibenzo-p-dioxin metabolic process                                                        | 1.40E-03 | 4.08E-02 | 2/387 0.5%      | 3/17777 0.0%       | <i>CYP1A1 AHRR</i>                                                                                                                                                                                                                                                               |
| 60534 | trachea cartilage development                                                             | 1.40E-03 | 4.08E-02 | 2/387 0.5%      | 3/17777 0.0%       | <i>WNT7B HOXA5</i>                                                                                                                                                                                                                                                               |
| 5294  | neutral L-amino acid secondary active transmembrane transporter activity                  | 1.40E-03 | 4.08E-02 | 2/387 0.5%      | 3/17777 0.0%       | <i>SLC6A9 SLC7A11</i>                                                                                                                                                                                                                                                            |
| 72080 | nephron tubule development                                                                | 1.40E-03 | 4.08E-02 | 2/387 0.5%      | 3/17777 0.0%       | <i>WNT7B OSR1</i>                                                                                                                                                                                                                                                                |
| 1533  | cornified envelope                                                                        | 1.41E-03 | 4.08E-02 | 4/387 1.0%      | 23/17777<br>0.1%   | <i>FLG SPRR1A IVL SPRR1B</i>                                                                                                                                                                                                                                                     |
| 16813 | hydrolase activity, acting on carbon-nitrogen (but not peptide) bonds, in linear amidines | 1.48E-03 | 4.18E-02 | 3/387 0.7%      | 11/17777<br>0.0%   | <i>PADI3 PADI2 PADI1</i>                                                                                                                                                                                                                                                         |
| 60428 | lung epithelium development                                                               | 1.48E-03 | 4.18E-02 | 3/387 0.7%      | 11/17777<br>0.0%   | <i>ERRF1 WNT7B HOXA5</i>                                                                                                                                                                                                                                                         |

|       |                                                                      |          |          |                 |                     |                                                                                                                                                                                                                                                                                                                                                                                                                                                                                                                                |
|-------|----------------------------------------------------------------------|----------|----------|-----------------|---------------------|--------------------------------------------------------------------------------------------------------------------------------------------------------------------------------------------------------------------------------------------------------------------------------------------------------------------------------------------------------------------------------------------------------------------------------------------------------------------------------------------------------------------------------|
| 55093 | response to hyperoxia                                                | 1.48E-03 | 4.18E-02 | 3/387 0.7%      | 11/17777<br>0.0%    | <i>CDKN1A CYP1A1 AHRR</i>                                                                                                                                                                                                                                                                                                                                                                                                                                                                                                      |
| 122   | negative regulation of transcription from RNA polymerase II promoter | 1.58E-03 | 4.41E-02 | 15/387 3.8%     | 286/17777<br>1.6%   | <i>CDKN1C KDM6B EGR1 CDX2 CITED2 CBX2 NR0B2 GLI2 BCL6 DNAJB5 SALL4 IRF2 TXNIP MDFI MXD4</i>                                                                                                                                                                                                                                                                                                                                                                                                                                    |
| 4672  | protein kinase activity                                              | 1.59E-03 | 4.41E-02 | 24/387 6.2%     | 568/17777<br>3.1%   | <i>PRKCG FLG EPHA4 MAP3K3 CDKN1A CDKL5 PKDCC TXK OSR1 TESK2 CCK MYT1 EFNA4 ACVR2B TGFBR3 EPGN EFNA3 NUA2 ERBB3 PDK4 ULK1 JAK3 FRK FGFR2</i>                                                                                                                                                                                                                                                                                                                                                                                    |
| 10556 | regulation of macromolecule biosynthetic process                     | 1.62E-03 | 4.46E-02 | 85/387<br>21.9% | 2877/17777<br>16.1% | <i>CDKN1C ZNF512B CSRNPI BTG2 CSF2 ZBTB24 CITED2 CITED4 RORC HNF4G JADE1 CHD6 IRS2 AREG GLI2 NR3C2 SIX5 MYC SALL4 MYB DPF1 ANKRD1 ZNF488 ZNF565 ZNF763 HOXA5 EID2B TIGD3 KDM6B ZNF362 EDN1 FOXD2 KMT5C MAMSTR ARID5B SOX12 BHLHA15 POU3F1 MYT1 GEM EREG KAT6B IRF2 TXNIP AHRR MDFI KDM7A HBEGF ZNF233 ZNF552 CREB5 ZNF792 ZNF395 SRF TSHZ1 KRBA2 GATA2 DNAJB5 BRD8 OTX1 PPARGC1A ATOH1 HOXC6 EGR1 CDX2 SNAI3 CBX2 ZBTB10 GRHL3 CCK NR0B2 ELL2 ACVR2B PNRC1 POU6F1 FOSL1 NR4A2 SEPSECS BCL6 ZNF618 AGO4 JMY SP5 RHEBL1 MXD4</i> |
| 42058 | regulation of epidermal growth factor receptor signaling pathway     | 1.66E-03 | 4.48E-02 | 4/387 1.0%      | 24/17777<br>0.1%    | <i>ERRF1 EPGN FASLG EREG</i>                                                                                                                                                                                                                                                                                                                                                                                                                                                                                                   |
| 6775  | fat-soluble vitamin metabolic process                                | 1.68E-03 | 4.48E-02 | 5/387 1.2%      | 40/17777<br>0.2%    | <i>ALDH1A3 DHRS9 CYP1A1 AHRR BCO2</i>                                                                                                                                                                                                                                                                                                                                                                                                                                                                                          |
| 31970 | organelle envelope lumen                                             | 1.68E-03 | 4.48E-02 | 5/387 1.2%      | 40/17777<br>0.2%    | <i>GATM HSD3B1 TXNIP SUOX PTGES</i>                                                                                                                                                                                                                                                                                                                                                                                                                                                                                            |
| 45786 | negative regulation of cell cycle                                    | 1.68E-03 | 4.48E-02 | 11/387 2.8%     | 176/17777<br>0.9%   | <i>CDKN1C CDKN1A CXCL8 SESN3 BCL6 MYC SESN1 TP53INP1 JMY HBP1 GEM</i>                                                                                                                                                                                                                                                                                                                                                                                                                                                          |

|       |                                                                                 |          |          |             |                   |                                                                                                                                                                                                          |
|-------|---------------------------------------------------------------------------------|----------|----------|-------------|-------------------|----------------------------------------------------------------------------------------------------------------------------------------------------------------------------------------------------------|
| 30182 | neuron differentiation                                                          | 1.74E-03 | 4.60E-02 | 20/387 5.1% | 442/17777<br>2.4% | <i>FLG CDKN1C EPHA4 BTG2 PTPRR FZD2 UNC5B FZD4 WNT7B SRF CCK GATA2 GLI2 EFNA1 NR4A2 ERBB3 SLITRK6 ULK1 ATOH1 CHST3</i>                                                                                   |
| 19199 | transmembrane receptor<br>protein kinase activity                               | 1.78E-03 | 4.68E-02 | 7/387 1.8%  | 80/17777<br>0.4%  | <i>FLG TGFBR3 EPHA4 EFNA3 ERBB3 EFNA4 FGFR2</i>                                                                                                                                                          |
| 51173 | positive regulation of nitrogen<br>compound metabolic process                   | 1.91E-03 | 4.98E-02 | 27/387 6.9% | 677/17777<br>3.8% | <i>CSRNPI CSF2 CITED2 SRF CITED4 GATA2 PTGS2 AREG GLI2 FGD2 AKAP12 MYC SALL4 PPARGC1A HOXA5 ATOH1 PRKCG ABCA1 EGRI EDNI GRHL3 BHLHA15 EREG FOSL1 NR4A2 KAT6B CREB5</i>                                   |
| 42981 | regulation of apoptosis                                                         | 1.93E-03 | 5.00E-02 | 32/387 8.2% | 851/17777<br>4.7% | <i>FLG CDKN1A BTG2 CSF2 TNFRSF6B CITED2 SERPINE1 TNFAIP3 IRS2 FASLG PTGS2 FGD2 NUA2 ERBB3 TP53INP1 DPF1 TNFSF10 PHLDA1 HOXA5 OSR1 CIDEA CCK FOSL1 NR4A2 ALDH1A3 VNN1 PROC BCL6 JMY TXNIP PDE5A BNIPL</i> |
| 45742 | positive regulation of<br>epidermal growth factor<br>receptor signaling pathway | 1.95E-03 | 5.00E-02 | 3/387 0.7%  | 12/17777<br>0.0%  | <i>EPGN FASLG EREG</i>                                                                                                                                                                                   |

<sup>a</sup> *p*-value in hypergeometric test after correction

<sup>b</sup> The denominator represents the total number of genes with GO annotation and the numerator represents the number of genes belonging to each GO term

<sup>c</sup> The denominator represents the number of reference genes with GO annotation and the numerator represents the number of references genes annotated in the listed GO terms



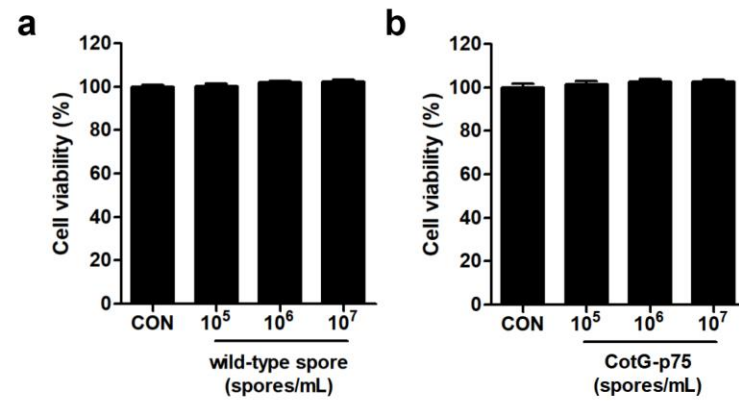

**Figure S1.** Effect of wild-type spores (a) and CotG-p75 (b) on cell viability of intestinal epithelial HT-29 cells. Cell viability was determined after 24 h incubation with each spore. Each column represents the mean  $\pm$  standard deviation ( $n = 3$ ) with respect to 100% control. Statistical analysis was performed by a one-way ANOVA and Tukey-Kramer post-hoc analysis.

**A**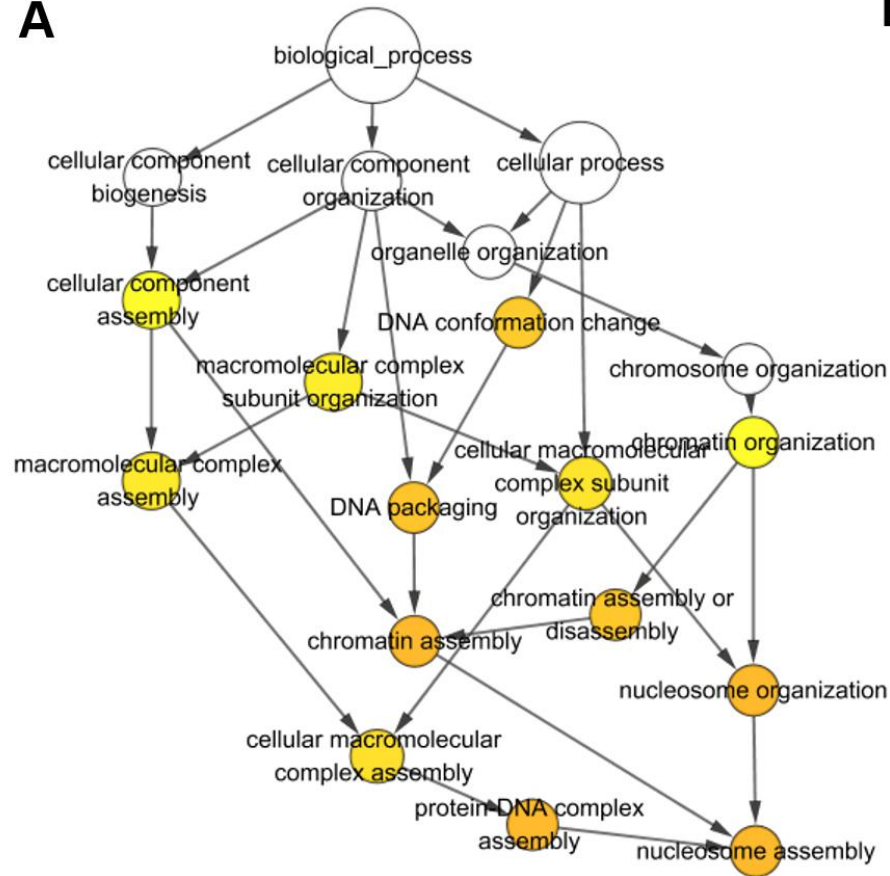**B**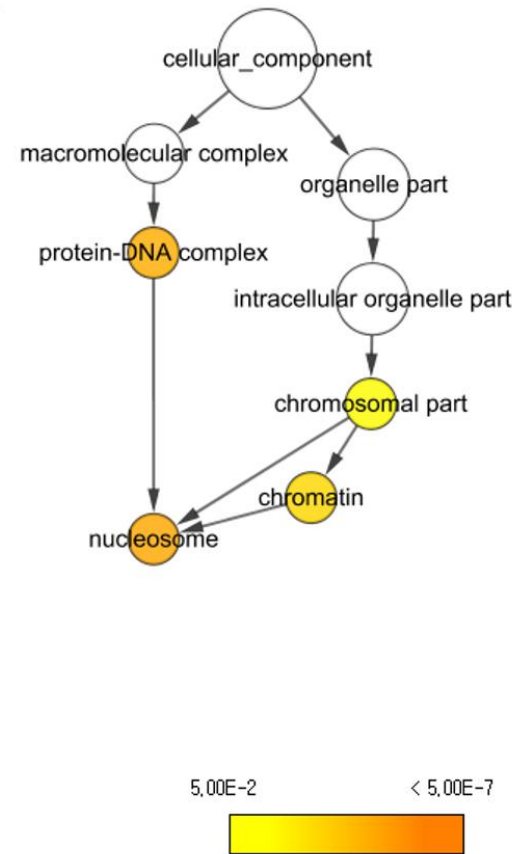

**Figure S2.** Illustration of Gene ontology (GO) term networks of differentially expressed genes between wild-type spore-stimulated HT-29 cells and control. The networks were generated by Cytoscape BiNGO. All significantly enriched GO terms in biological process (A) and cellular component (B) are presented. Circle size represents GO hierarchy. Yellow shade represents enrichment level. The threshold of hypergeometric distribution of the functional annotation was set at corrected  $p$ -value < 0.005

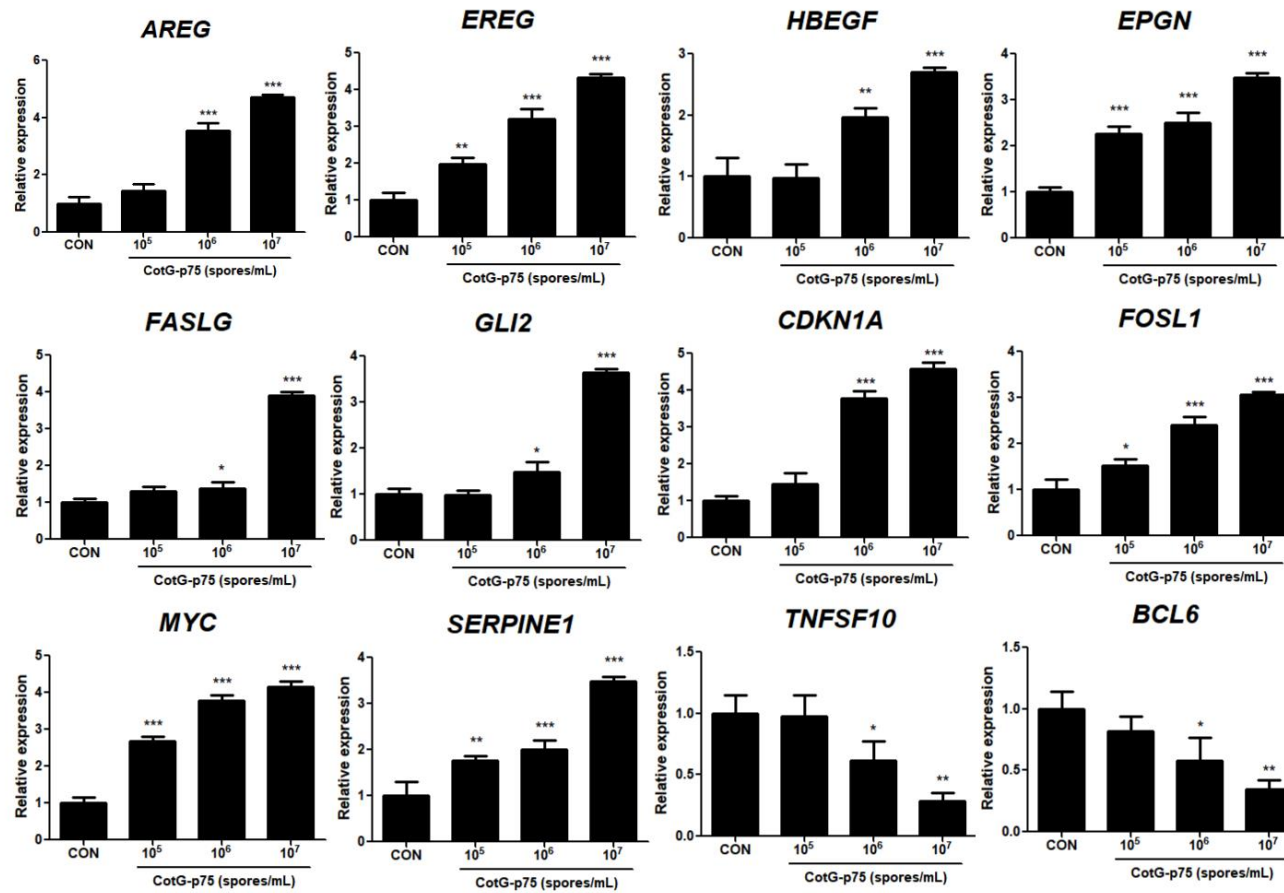

**Figure S3.** The mRNA expression of the genes involved in cell survival and proliferation from HT-29 stimulated by different doses of CotG-p75. HT-29 cells were incubated with 10<sup>5</sup>, 10<sup>6</sup>, and 10<sup>7</sup> spores/mL of CotG-p75 for 3 h. The relative expression level was determined by real-time quantitative PCR. RT-qPCR data presented as mean  $\pm$  standard deviation (n = 3). Statistical analysis was performed by a one-way ANOVA and Tukey-Kramer post-hoc analysis. Asterisks (\*) indicate a significance difference from the control (\*  $p < 0.05$ , \*\*  $p < 0.01$ , \*\*\*  $p < 0.001$ ).

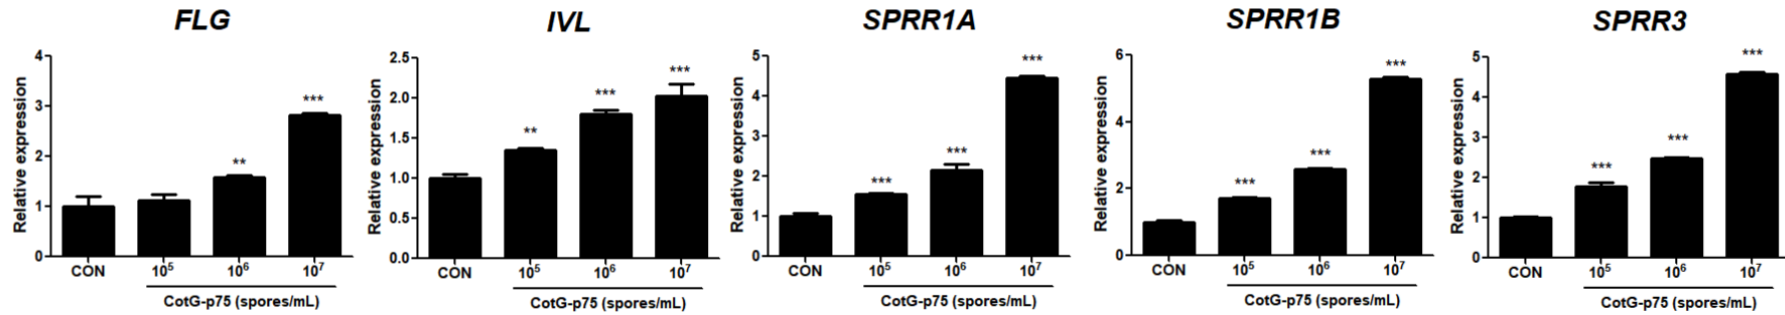

**Figure S4.** The mRNA expression of the genes involved in epithelium development and differentiation from HT-29 stimulated by different doses of CotG-p75. HT-29 cells were incubated with 10<sup>5</sup>, 10<sup>6</sup>, and 10<sup>7</sup> spores/mL of CotG-p75 for 3 h. The relative expression level was determined by real-time quantitative PCR. RT-qPCR data presented as mean  $\pm$  standard deviation ( $n = 3$ ). Statistical analysis was performed by a one-way ANOVA and Tukey-Kramer post-hoc analysis. Asterisks (\*) indicate a significance difference from the control (\*  $p < 0.05$ , \*\*  $p < 0.01$ , \*\*\*  $p < 0.001$ ).

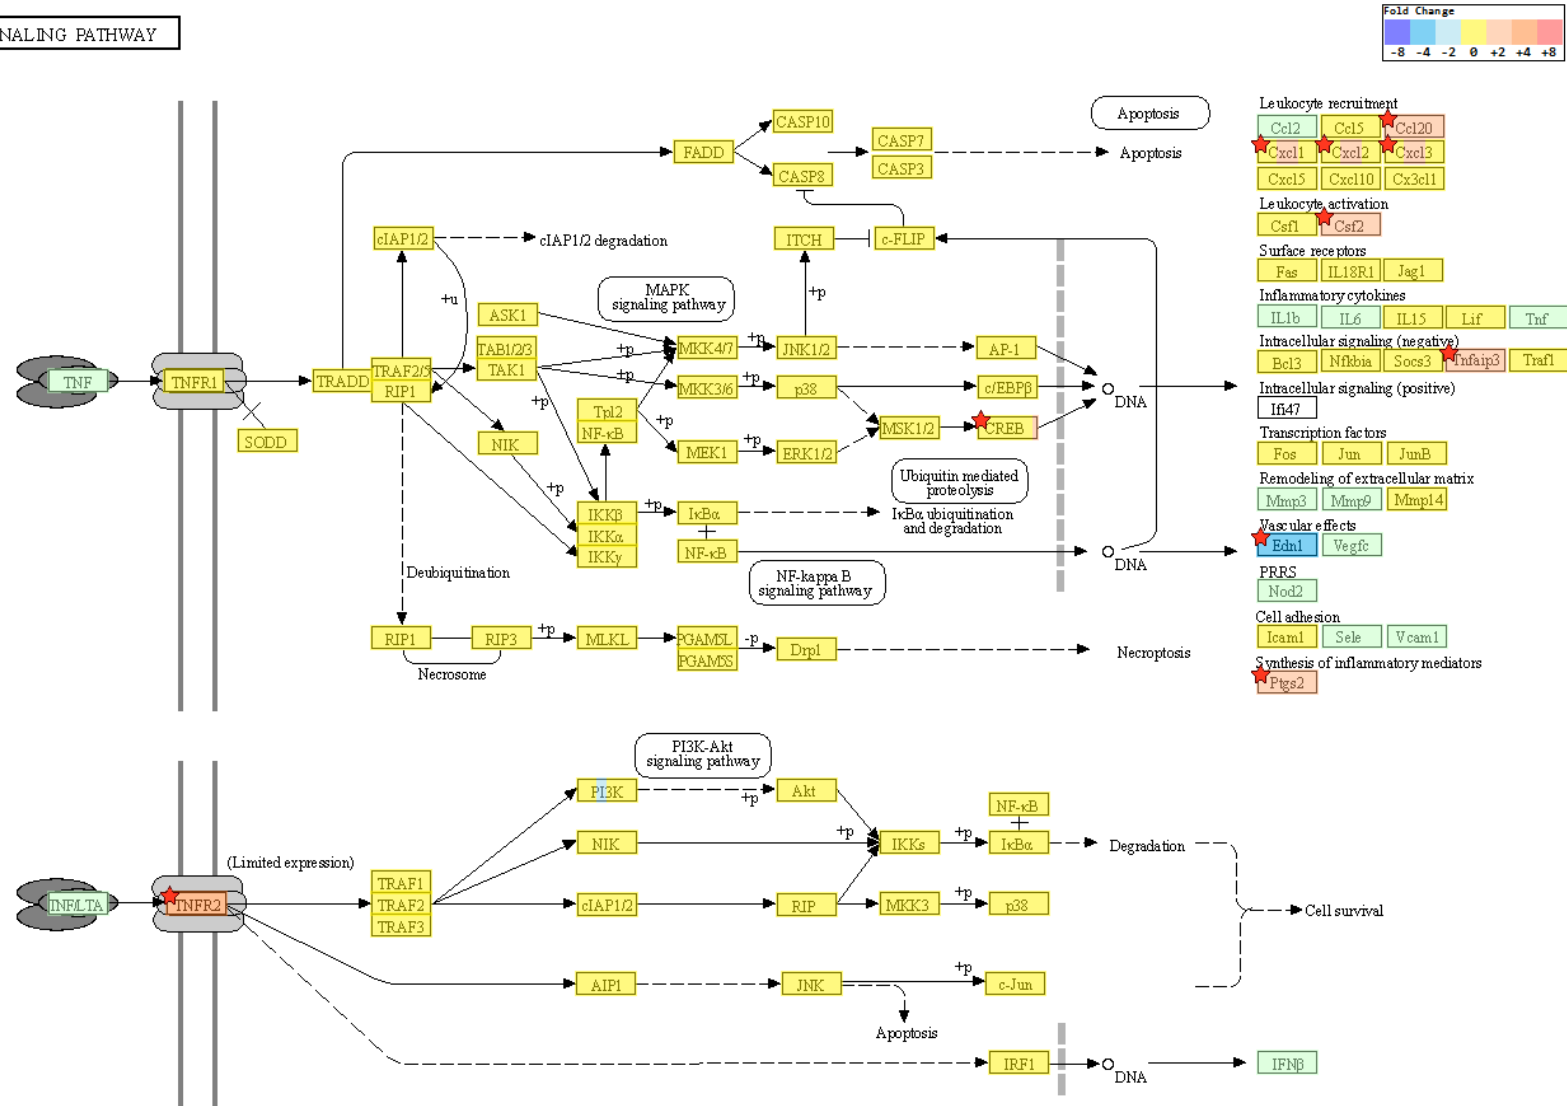

**Figure S5.** TNF signaling pathway in KEGG pathway analysis. Red and blue colors represent up-regulated and down-regulated DEGs, respectively.

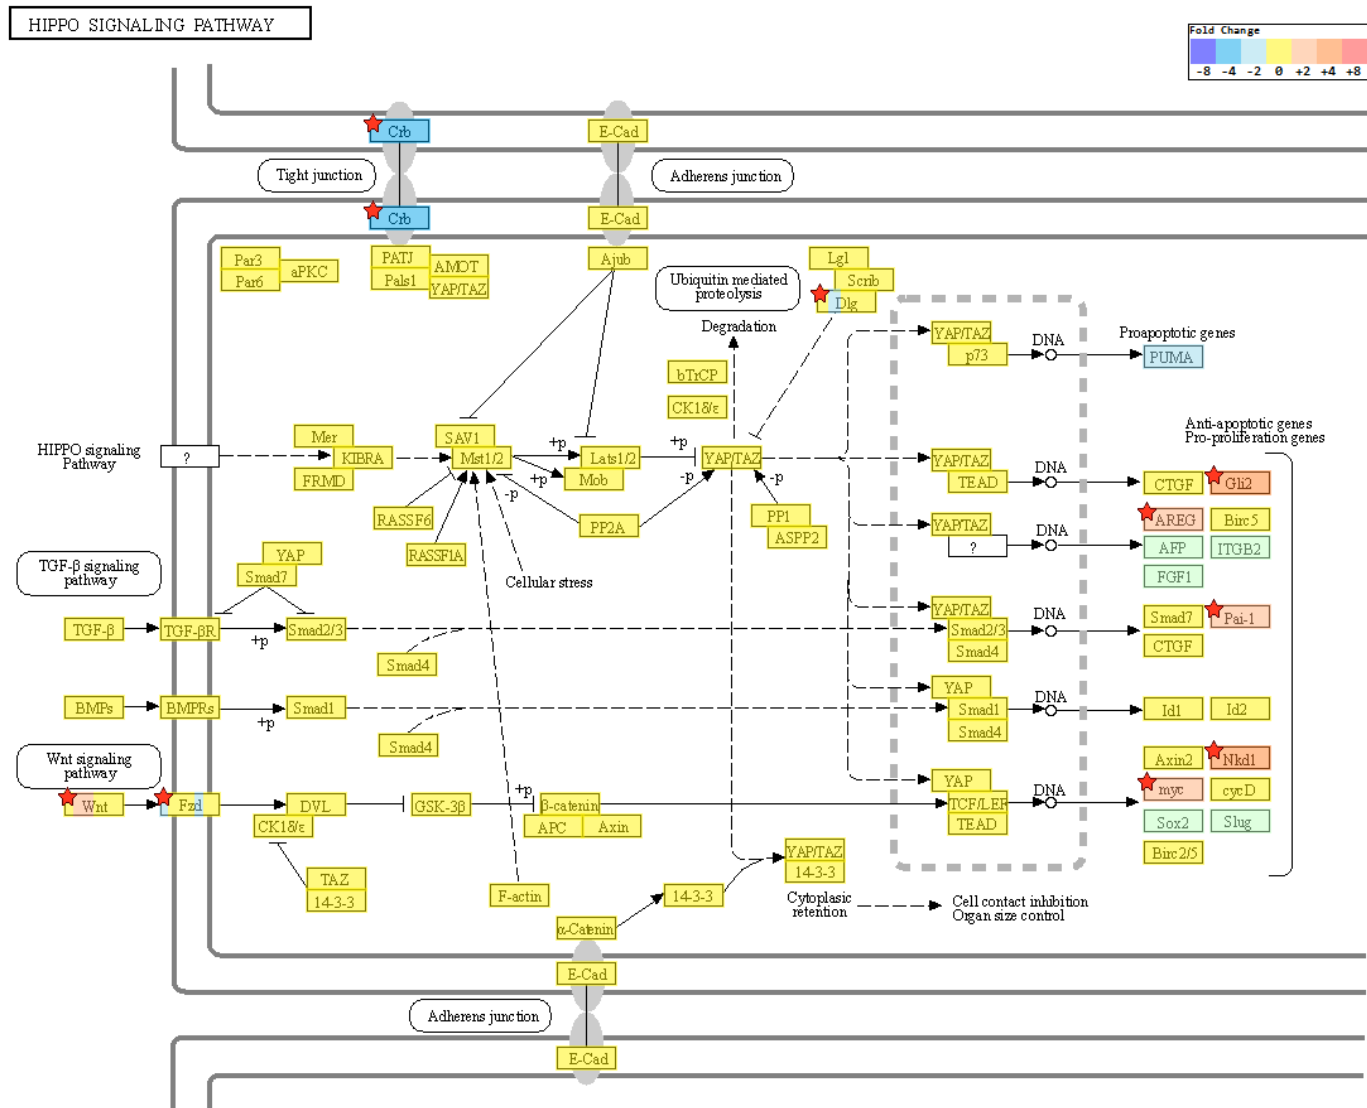

**Figure S6.** Hippo signaling pathway in KEGG pathway analysis. Red and blue colors represent up-regulated and down-regulated DEGs, respectively.
